# Supplementary material
Source: Frontiers journal article supplement (https://www.frontiersin.org/articles/260772)
Supplement: Data_Sheet_1.XLSX [file Data_Sheet_1.XLSX]

## Sheet: alkane_d13C
Study	Growth	Location	Material	Type	Subtype	LeafType	SeedType	Genus	species	bulk	C25	C27	C29	C31	C33	C35
Vogts2009	outdoor	Gabon	leaves	C3	NA	NA	A	Combretum	conchipetalum	-29.2	NA	NA	-37.3	-36.2	NA	NA
Vogts2009	outdoor	Gabon	leaves	C3	NA	NA	A	Combretum	racemosum	-29.7	NA	NA	-38.7	-38.1	NA	NA
Vogts2009	outdoor	Gabon	leaves	C3	NA	NA	A	Cuervea	macrophylla	-28.5	NA	NA	-38.2	-38.7	NA	NA
Vogts2009	outdoor	Gabon	leaves	C3	NA	NA	A	Landolphia	mannii	-28.1	NA	NA	NA	NA	-34.9	NA
Vogts2009	outdoor	Gabon	leaves	C3	NA	NA	A	Paullinia	pinnata	-30	NA	NA	-39.7	-38.5	NA	NA
Vogts2009	outdoor	Gabon	leaves	C3	NA	NA	A	Psychotria	ealensis	-29	NA	NA	-35.5	-35.3	NA	NA
Vogts2009	outdoor	Gabon	leaves	C3	NA	NA	A	Coffea	sp.	-29.9	NA	NA	-35.1	-34.6	NA	NA
Vogts2009	outdoor	Gabon	leaves	C3	NA	NA	A	Combretum	erosum	-30.6	NA	-33	-32.3	-32	NA	NA
Vogts2009	outdoor	Gabon	leaves	C3	NA	NA	A	Combretum	indicum	-26.3	NA	NA	-35.6	-36.1	-37	NA
Vogts2009	outdoor	Benin	leaves	C3	NA	NA	A	Combretum	indicum	-26.9	NA	NA	-35.6	-36.1	-34	NA
Vogts2009	outdoor	Benin	leaves	C3	NA	NA	A	Combretum	indicum	-27.8	NA	-34.5	-36.7	-36.5	NA	NA
Vogts2009	outdoor	Benin	leaves	C3	NA	NA	A	Combretum	molle	-28.6	NA	-31.9	-34.3	-35.7	NA	NA
Vogts2009	outdoor	Gabon	leaves	C3	NA	NA	A	Englerina	gabonensis	-31.2	NA	NA	-42.2	NA	NA	NA
Vogts2009	outdoor	Congo	leaves	C3	NA	NA	A	Ficus	natalensis subsp. Leprieurii	-30.1	NA	NA	-38.8	NA	NA	NA
Vogts2009	outdoor	Benin	leaves	C3	NA	NA	A	Ficus	thonningii	-30.9	NA	NA	-37.8	-37.9	-37.9	NA
Vogts2009	outdoor	Gabon	leaves	C3	NA	NA	NA	Oxyanthus	unilocularis	-29.3	NA	NA	-36.8	-37	-35.8	NA
Vogts2009	outdoor	Gabon	leaves	C3	NA	NA	NA	Stipularia	africana	-30.6	NA	NA	-34.3	NA	NA	NA
Vogts2009	outdoor	Gabon	leaves	C3	NA	NA	NA	Berlinia	confusa	-27.3	NA	NA	-34.7	NA	NA	NA
Vogts2009	outdoor	Gabon	leaves	C3	NA	NA	NA	Cynometra	mannii	-30.2	NA	NA	-39.1	NA	NA	NA
Vogts2009	outdoor	Gabon	leaves	C3	NA	NA	NA	Ficus	ottoniifolia	-36	NA	NA	-44.9	-45.9	NA	NA
Vogts2009	outdoor	Burkina Faso	leaves	C3	NA	NA	NA	Oncoba	spinosa	-29.8	NA	NA	-38	-38.4	NA	NA
Vogts2009	outdoor	Gabon	leaves	C3	NA	NA	NA	Psychotria	djumaensis	-29	NA	NA	-33.9	-33.1	NA	NA
Vogts2009	outdoor	Gabon	leaves	C3	NA	NA	NA	Treculia	africana	-30.4	NA	NA	-38.1	-39.4	NA	NA
Vogts2009	outdoor	Gabon	leaves	C3	NA	NA	NA	Uapaca	guineensis	-31.1	NA	NA	-39.3	-38.6	-37.2	NA
Vogts2009	outdoor	Sudan	whole.plant	C3	NA	NA	NA	Abutilon	graveolens	-26.5	-32.2	-33.4	-33.6	-34.4	-33.5	NA
Vogts2009	outdoor	Sudan	whole.plant	C3	NA	NA	NA	Achyrantes	aspera	-26.7	NA	NA	-32.2	-34.2	-35.9	NA
Vogts2009	outdoor	Sudan	whole.plant	C3	NA	NA	NA	Digeria	muricata	-27.7	NA	-37.9	-36.9	-37.7	-37.6	NA
Vogts2009	outdoor	Sudan	whole.plant	C3	NA	NA	NA	Heliotropium	sp.	-27.5	-32.6	-33.5	-36	-36.2	-36.2	NA
Vogts2009	outdoor	Sudan	whole.plant	C3	NA	NA	NA	Ipomoea	cordofana	-26.8	NA	-33.7	-34.6	-36.7	-37.1	NA
Vogts2009	outdoor	Sudan	whole.plant	C3	NA	NA	NA	Ocimum	basilicum	-29.3	NA	-30.3	-29.1	-31.8	-33.1	-28.2
Vogts2009	outdoor	Sudan	whole.plant	C3	NA	NA	NA	Vigna	sp.	-28.7	NA	-36.2	-36.6	-39.4	-38.4	NA
Vogts2009	outdoor	Sudan	whole.plant	C3	NA	NA	NA	Xanthium	brasilicum	-26.4	NA	NA	-33.7	-34.8	-34.7	NA
Vogts2009	outdoor	Namibia	leaves	C3	NA	NA	NA	Acacia	mellifera	-27.2	NA	-31.6	-32.6	-32.8	NA	NA
Vogts2009	outdoor	Namibia	leaves	C3	NA	NA	NA	Acacia	nebrownii	-24.9	NA	-30.6	-32.3	-33.9	NA	NA
Vogts2009	outdoor	Namibia	leaves	C3	NA	NA	NA	Catophractes	alexandri	-27.1	NA	NA	-34	-34.6	NA	NA
Vogts2009	outdoor	Tanzania	whole.plant	C3	NA	NA	NA	Crassocephalum	mannii	-28.3	NA	NA	-33.8	-35.1	-34.6	NA
Vogts2009	outdoor	Namibia	leaves	C3	NA	NA	NA	Dichrostachis	cinera	-28.5	-31.6	-32.9	-33.8	-32.5	-31.6	NA
Vogts2009	outdoor	Namibia	leaves	C3	NA	NA	NA	Grewia	flavescens	-27.2	NA	NA	-36.1	-35.4	NA	NA
Vogts2009	outdoor	Namibia	leaves	C3	NA	NA	NA	Grewia	flavescens	-28.4	NA	NA	-35.7	-37	-35.5	NA
Vogts2009	outdoor	Namibia	leaves	C3	NA	NA	NA	Gymnosporia	buxifolia	-25.4	NA	-35.3	-33.9	-33.1	-32.8	NA
Vogts2009	outdoor	Namibia	leaves	C3	NA	NA	NA	Salvadora	persica	-27.2	-33.5	-34.3	-36.3	-35.5	-34.1	NA
Vogts2009	outdoor	Namibia	leaves	C3	NA	NA	NA	Acacia	erioloba	-29.1	-33.7	-34.4	-34.6	-36.3	-34.8	NA
Vogts2009	outdoor	Namibia	leaves	C3	NA	NA	NA	Acacia	karroo	-27.7	-31.9	-32.3	-32.2	-33.7	NA	NA
Vogts2009	outdoor	Namibia	leaves	C3	NA	NA	NA	Acacia	kirkii	-28	NA	NA	-35.5	-37.1	-37.1	NA
Vogts2009	outdoor	Namibia	leaves	C3	NA	NA	NA	Acacia	luederitzii	-27.4	-30.2	-31.4	-31.3	-30.1	-31.4	NA
Vogts2009	outdoor	Sudan	leaves	C3	NA	NA	NA	Acacia	mellifera	-26.2	-33.1	-32.6	-33.6	-33	NA	NA
Vogts2009	outdoor	Sudan	leaves	C3	NA	NA	NA	Acacia	senegal	-27.1	NA	-34.5	-32.3	-34.9	-35.2	NA
Vogts2009	outdoor	Namibia	leaves	C3	NA	NA	NA	Adansonia	digitata	-27	NA	-35.3	-36	-36	-37	NA
Vogts2009	outdoor	Namibia	leaves	C3	NA	NA	NA	Albizia	anthelmintica	-27.3	-31.4	-33	-33.5	NA	NA	NA
Vogts2009	outdoor	Sudan	leaves	C3	NA	NA	NA	Balanites	aegyptiaca	-26.3	NA	-30.8	-31.5	-31.8	NA	NA
Vogts2009	outdoor	Namibia	leaves	C3	NA	NA	NA	Boscia	albitrunca	-26.8	NA	NA	NA	NA	NA	NA
Vogts2009	outdoor	Namibia	leaves	C3	NA	NA	NA	Boscia	foetida	-26.3	NA	NA	-34.3	-30.9	-32.8	NA
Vogts2009	outdoor	Namibia	leaves	C3	NA	NA	NA	Burkea	africana	-28.3	NA	NA	NA	-36	-36	NA
Vogts2009	outdoor	Namibia	leaves	C3	NA	NA	NA	Colophospermum	mopane	-24.2	NA	-29.3	-30.1	-30.6	-30.9	NA
Vogts2009	outdoor	Namibia	leaves	C3	NA	NA	NA	Colophospermum	mopane	-28.3	NA	NA	-31.9	-32.3	-30.4	NA
Vogts2009	outdoor	Namibia	leaves	C3	NA	NA	NA	Combretum	apiculatum	-25.2	NA	NA	NA	-34.7	-34.8	NA
Vogts2009	outdoor	Namibia	leaves	C3	NA	NA	NA	Combretum	imberbe	-26	-32.4	-28.9	-32.1	-33.1	NA	NA
Vogts2009	outdoor	Namibia	leaves	C3	NA	NA	NA	Commiphora	glaucescens	-26.8	-30.6	-30.4	-30.9	-30.1	-30.1	-29.4
Vogts2009	outdoor	Namibia	leaves	C3	NA	NA	NA	Commiphora	merkeri	-28.4	NA	-36	-37.7	-37.7	-36.3	NA
Vogts2009	outdoor	Namibia	leaves	C3	NA	NA	NA	Euclea	pseudebenus	-24.6	NA	NA	NA	-31	-30.2	NA
Vogts2009	outdoor	Namibia	leaves	C3	NA	NA	NA	Faidherbia	albida	-27.7	NA	-33.2	-31.9	NA	NA	NA
Vogts2009	outdoor	Tanzania	leaves	C3	NA	NA	NA	Leucaena	leucocephala	-27.6	-33.3	-32.4	-36.9	-33.6	NA	NA
Vogts2009	outdoor	Tanzania	leaves	C3	NA	NA	NA	Morus	alba	-28	NA	-35.5	-35.5	-37.4	-38.1	NA
Vogts2009	outdoor	Namibia	leaves	C3	NA	NA	NA	Sclerocarya	birrea subsp. Caffra	-28.1	NA	-31.4	-31.7	-31.7	NA	NA
Vogts2009	outdoor	Tanzania	leaves	C3	NA	NA	NA	Sesbania	sesban	-28.8	-32.9	-34.9	-36.3	-37.1	-33.5	NA
Vogts2009	outdoor	Namibia	leaves	C3	NA	NA	NA	Tamarix	usneoides	-24	NA	-28.9	-28.1	-27.4	NA	NA
Vogts2009	outdoor	Namibia	leaves	C3	NA	NA	NA	Terminalia	prunioides	-25.7	NA	-31.8	-33	-36.2	NA	NA
Vogts2009	outdoor	Namibia	leaves	C3	NA	NA	NA	Ziziphus	mucronata	-25.7	-29.7	-32.6	-29.9	-33.8	-34.4	NA
Vogts2009	outdoor	Sudan	leaves	C3	NA	NA	NA	Ziziphus	spina-christi	-26.8	-32.6	-32.3	-32.3	-35	-35.4	-35.5
Rommerskirchen2006	outdoor	Namibia	leaves	C4	NADP_ME	NA	NA	Aristida	adscensionisc	NA	NA	-29	-24.9	-25.3	-23.8	NA
Rommerskirchen2006	outdoor	Zimbabwe	leaves	C4	NADP_ME	NA	NA	Aristida	barbicollis	NA	NA	-20	-21.4	-23.9	-22.1	-21
Rommerskirchen2006	outdoor	Namibia	leaves	C4	NADP_ME	NA	NA	Aristida	congesta	NA	NA	-20.4	-22.9	-24.3	-24	-24
Rommerskirchen2006	outdoor	Zimbabwe	leaves	C4	NADP_ME	NA	NA	Aristida	graciliflora	NA	NA	-25.6	-23.9	-24.1	-23.9	NA
Rommerskirchen2006	outdoor	Zimbabwe	leaves	C4	NADP_ME	NA	NA	Aristida	meridionalis	NA	NA	-21.4	-22.4	-22.8	-22.4	NA
Rommerskirchen2006	outdoor	Namibia	leaves	C4	NADP_ME	NA	NA	Aristida	meridionalis	NA	NA	-20.8	-21.4	-21.9	-22.7	NA
Rommerskirchen2006	outdoor	Namibia	leaves	C4	NAD_ME	NA	NA	Stipagrostis	ciliatac	NA	NA	-24.7	-21.7	-19.8	-20.7	NA
Rommerskirchen2006	outdoor	Namibia	leaves	C4	NAD_ME	NA	NA	Stipagrostis	hirtiglumac	NA	NA	-25.3	-25	-23.2	-24	NA
Rommerskirchen2006	outdoor	Namibia	leaves	C4	NAD_ME	NA	NA	Stipagrostis	uniplumis	NA	NA	-23.2	-24.5	-25.9	-24	NA
Rommerskirchen2006	outdoor	Zimbabwe	leaves	C4	PCK	NA	NA	Chloris	gayana	NA	NA	-23	-22.5	-23.4	-24.9	-24
Rommerskirchen2006	outdoor	Zimbabwe	leaves	C4	PCK	NA	NA	Chloris	virgata	NA	NA	-20.3	-19.6	-20.2	-21.1	-21
Rommerskirchen2006	outdoor	Namibia	leaves	C4	PCK	NA	NA	Chloris	virgatac	NA	NA	-24.2	-20.6	-21.7	-21.1	-20
Rommerskirchen2006	outdoor	Namibia	leaves	C4	NAD_ME	NA	NA	Enneapogon	sp.	NA	NA	-22.3	-23	-22.7	-22.5	-23
Rommerskirchen2006	outdoor	Zimbabwe	leaves	C4	NAD_ME	NA	NA	Enneapogon	cenchroides	NA	NA	-19.5	-19.4	-20.9	-22.7	-23
Rommerskirchen2006	outdoor	Namibia	leaves	C4	NAD_ME	NA	NA	Enneapogon	cenchroidesc	NA	NA	-19.5	-18.3	-20.1	-20.1	NA
Rommerskirchen2006	outdoor	Namibia	leaves	C4	NAD_ME	NA	NA	Eragrostis	nindensis	NA	NA	-24.4	-22.7	-24.6	-24	NA
Rommerskirchen2006	outdoor	Zimbabwe	leaves	C4	NAD_ME	NA	NA	Eragrostis	superba	NA	NA	-20.4	-20.8	-21.8	-22.7	-23
Rommerskirchen2006	outdoor	Sudan	leaves	C4	NAD_ME	NA	NA	Eragrostis	tremula	NA	NA	-24	-25.1	-25.9	-26.3	-26
Rommerskirchen2006	outdoor	Zimbabwe	leaves	C4	NAD_ME	NA	NA	Eragrostis	violacea de winter	NA	NA	-18	-18.1	-19.6	-19.2	-19.3
Rommerskirchen2006	outdoor	Zimbabwe	leaves	C4	NAD_ME	NA	NA	Eragrostis	viscosa	NA	NA	-20	-19.6	-21.8	-22.4	-21
Rommerskirchen2006	outdoor	Namibia	leaves	C4	PCK	NA	NA	Schmidtia	kalahariensisc	NA	NA	-21.8	-22	-22.9	-20.5	-21
Rommerskirchen2006	outdoor	Zimbabwe	leaves	C4	NAD_ME	NA	NA	Sporobolus	ioclados	NA	NA	-19.9	-21.8	-22.4	-22	-21
Rommerskirchen2006	outdoor	Zimbabwe	leaves	C4	PCK	NA	NA	Sporobolus	pyramidalis	NA	NA	-21.2	-22	-22.1	-22.7	-23
Rommerskirchen2006	outdoor	Zimbabwe	leaves	C4	NADP_ME	NA	NA	Bothriochloa	insculpta	NA	NA	-18	-19.2	-18.7	-18.6	NA
Rommerskirchen2006	outdoor	Zimbabwe	leaves	C4	PCK	NA	NA	Brachiaria	erucitormis	NA	NA	-21.9	-20.4	-20.9	-20.3	NA
Rommerskirchen2006	outdoor	Zimbabwe	leaves	C4	NADP_ME	NA	NA	Digitaria	milanjiana	NA	NA	-20.5	-18.9	-19.5	-19.7	-20
Rommerskirchen2006	outdoor	Zimbabwe	leaves	C4	NADP_ME	NA	NA	Hyparrhenia	filipendula	NA	NA	-21.5	-21.9	-21.9	-22.8	-23
Rommerskirchen2006	outdoor	Zimbabwe	leaves	C4	NADP_ME	NA	NA	Loudetia	simplex	NA	NA	-19.8	-18.6	-18.2	-20	-22
Rommerskirchen2006	outdoor	Namibia	leaves	C4	?	NA	NA	Panicum	sp.	NA	NA	-22.2	-22.6	-23	-22.7	-22
Rommerskirchen2006	outdoor	Namibia	leaves	C4	NAD_ME	NA	NA	Panicum	arbusculumc	NA	NA	-24.1	-22	-24	-21.4	-21
Rommerskirchen2006	outdoor	Zimbabwe	leaves	C4	PCK	NA	NA	Panicum	maximum	NA	NA	-20	-20.8	-19.4	-23.3	NA
Rommerskirchen2006	outdoor	Namibia	leaves	C4	PCK	NA	NA	Panicum	maximum	NA	NA	-24.7	-24.2	-24.5	-24.8	NA
Rommerskirchen2006	outdoor	Zimbabwe	leaves	C4	NADP_ME	NA	NA	Themeda	triandra	NA	NA	-18.7	-21.3	-19.6	-20	-20
Rommerskirchen2006	outdoor	Australia	leaves	C3	NA	NA	NA	Bromus	sp.	NA	NA	-36	-35.7	-36	-37.5	-38.9
Rommerskirchen2006	outdoor	Peru	leaves	C3	NA	NA	NA	Festuca	orthophylla	NA	NA	-30.2	-30.3	-31.3	-31.2	NA
Rommerskirchen2006	outdoor	Peru	leaves	C3	NA	NA	NA	Festuca	orthophylla	NA	NA	-31	-31.2	-32.2	-33.1	NA
Rommerskirchen2006	outdoor	Tanzania	leaves	C4	C4	NA	NA	Sporobolus	sp.	NA	NA	NA	NA	-20.6	-20	-20.9
Rommerskirchen2006	outdoor	Tanzania	flowers	C4	C4	NA	NA	Sporobolus	sp.	NA	NA	-19.9	-19.6	-20.5	-20.4	-21.8
Rommerskirchen2006	outdoor	Tanzania	stems	C4	C4	NA	NA	Sporobolus	sp.	NA	NA	NA	-20	-19.6	-18.9	-20
Rommerskirchen2006	outdoor	Tanzania	leaves	C4	PCK	NA	NA	Brachiaria	sp.	NA	NA	-19.6	-19.2	-19.7	-19.9	-19.8
Rommerskirchen2006	outdoor	Tanzania	flowers	C4	PCK	NA	NA	Brachiaria	sp.	NA	NA	-19.1	-19	-18.8	-18.6	-21.4
Rommerskirchen2006	outdoor	Tanzania	stems	C4	PCK	NA	NA	Brachiaria	sp.	NA	NA	-22.5	-20.7	-20.2	-20	-21.3
Rieley1991	outdoor	UK	leaves	C3	NA	NA	NA	Fagus	sylvatica L.	NA	NA	-30.1	NA	NA	NA	NA
Rieley1991	outdoor	UK	leaves	C3	NA	NA	NA	Alnus	glutinosa L. Gaertn	NA	NA	-33.1	-32	NA	NA	NA
Rieley1991	outdoor	UK	leaves	C3	NA	NA	NA	Salix	alba	NA	-35.2	-34.5	-35.2	NA	NA	NA
Rieley1991	outdoor	UK	leaves	C3	NA	NA	NA	Quercus	rober	NA	-36	-35	-35.9	-36.3	NA	NA
Rieley1991	outdoor	UK	leaves	C3	NA	NA	NA	Acer	pseudoplatanus	NA	-32.1	-34.9	-37.3	-34.9	-33.2	NA
Rieley1991	outdoor	UK	leaves	C3	NA	NA	NA	Aesculus	hippocastanum	NA	NA	-38	-38.7	NA	NA	NA
Pedentchouk2008	outdoor	Washington	leaves	C3	NA	D	A	Betula	pendula	NA	-30.3	-30.1	NA	-32.2	NA	NA
Pedentchouk2008	outdoor	Washington	leaves	C3	NA	D	A	Betula	pendula	NA	-26.7	-26	NA	NA	NA	NA
Pedentchouk2008	outdoor	Washington	leaves	C3	NA	D	A	Betula	pendula	NA	-28.1	-27.9	NA	-32	NA	NA
Pedentchouk2008	outdoor	Washington	leaves	C3	NA	D	A	Betula	pendula	NA	-26.6	-26.9	NA	-30.7	NA	NA
Pedentchouk2008	outdoor	Washington	leaves	C3	NA	D	A	Betula	pendula	NA	-26.3	-26.6	NA	-31.1	NA	NA
Pedentchouk2008	outdoor	Washington	leaves	C3	NA	D	A	Betula	pendula	NA	-25.6	-26.3	NA	-31.4	NA	NA
Pedentchouk2008	outdoor	Washington	leaves	C3	NA	D	A	Betula	pendula	NA	-26.7	-26.1	NA	-31.7	NA	NA
Pedentchouk2008	outdoor	Washington	leaves	C3	NA	NA	A	Syringa	vulgaris	NA	NA	-32.4	-32.3	-33.2	-33.3	NA
Pedentchouk2008	outdoor	Washington	leaves	C3	NA	NA	A	Syringa	vulgaris	NA	NA	-32.3	-32.5	-33.6	-33.5	NA
Pedentchouk2008	outdoor	Washington	leaves	C3	NA	NA	A	Syringa	vulgaris	NA	NA	-32.2	-32.6	-33.3	-33.4	NA
Pedentchouk2008	outdoor	Washington	leaves	C3	NA	NA	A	Syringa	vulgaris	NA	NA	-32	-32.6	-34.2	-34.2	NA
Pedentchouk2008	outdoor	Washington	leaves	C3	NA	NA	A	Syringa	vulgaris	NA	NA	-32.7	-33.4	-34.6	-34.6	NA
Pedentchouk2008	outdoor	Washington	leaves	C3	NA	NA	A	Syringa	vulgaris	NA	NA	-32.2	-32.5	-33.1	-33.2	NA
Pedentchouk2008	outdoor	Washington	leaves	C3	NA	NA	A	Syringa	vulgaris	NA	NA	-32.4	-32.6	-33.7	-33.5	NA
Pedentchouk2008	outdoor	Washington	leaves	C3	NA	D	A	Populus	tremuloides	NA	-31.7	-32	NA	NA	NA	NA
Pedentchouk2008	outdoor	Washington	leaves	C3	NA	D	A	Populus	tremuloides	NA	-32.5	-32.5	NA	NA	NA	NA
Pedentchouk2008	outdoor	Washington	leaves	C3	NA	D	A	Populus	tremuloides	NA	-32.7	-32.7	NA	NA	NA	NA
Pedentchouk2008	outdoor	Washington	leaves	C3	NA	D	A	Populus	tremuloides	NA	-32.7	-32.3	NA	NA	NA	NA
Pedentchouk2008	outdoor	Washington	leaves	C3	NA	D	A	Populus	tremuloides	NA	-32.3	-31.9	NA	NA	NA	NA
Pedentchouk2008	outdoor	Washington	leaves	C3	NA	D	A	Populus	tremuloides	NA	-32.5	-32.3	NA	NA	NA	NA
Pedentchouk2008	outdoor	Washington	leaves	C3	NA	D	A	Populus	tremuloides	NA	-33.2	-32.7	NA	NA	NA	NA
Pedentchouk2008	outdoor	Washington	leaves	C3	NA	E	G	Pinus	sylvestris	NA	-28.2	-28.8	-28.5	-30.3	NA	NA
Pedentchouk2008	outdoor	Washington	leaves	C3	NA	E	G	Pinus	sylvestris	NA	-30.3	-30.6	-28.8	-31.4	NA	NA
Pedentchouk2008	outdoor	Washington	leaves	C3	NA	E	G	Pinus	sylvestris	NA	-29.8	-29.2	-27.6	-29.5	NA	NA
Pedentchouk2008	outdoor	Washington	leaves	C3	NA	E	G	Pinus	sylvestris	NA	-29.1	-29.2	-28.4	NA	NA	NA
Pedentchouk2008	outdoor	Washington	leaves	C3	NA	E	G	Pinus	sylvestris	NA	-29.4	-29.4	-28.8	-29.8	NA	NA
Pedentchouk2008	outdoor	Washington	leaves	C3	NA	E	G	Pinus	sylvestris	NA	-30	-29.9	-29.5	-31.3	NA	NA
Pedentchouk2008	outdoor	Washington	leaves	C3	NA	E	G	Pinus	sylvestris	NA	-29.2	-29.1	-28.4	-29.9	NA	NA
Pedentchouk2008	outdoor	Washington	leaves	C3	NA	E	G	Picea	pungens	NA	-30.3	-30.6	-29.9	-32.3	NA	NA
Pedentchouk2008	outdoor	Washington	leaves	C3	NA	E	G	Picea	pungens	NA	-30.8	-29.9	-28.6	-29.9	NA	NA
Pedentchouk2008	outdoor	Washington	leaves	C3	NA	E	G	Picea	pungens	NA	-30.1	-29.1	-27.7	-28.9	NA	NA
Pedentchouk2008	outdoor	Washington	leaves	C3	NA	E	G	Picea	pungens	NA	-30.7	-29.8	-28.5	-30.1	NA	NA
Pedentchouk2008	outdoor	Washington	leaves	C3	NA	E	G	Picea	pungens	NA	-30.3	-30	-28.8	-30.2	NA	NA
Pedentchouk2008	outdoor	Washington	leaves	C3	NA	E	G	Picea	pungens	NA	-30.4	-29.8	-28.4	-30	NA	NA
Pedentchouk2008	outdoor	Washington	leaves	C3	NA	E	G	Picea	pungens	NA	-30	-29.3	-27.9	-29.5	NA	NA
Lockheart1997	outdoor	UK	leaves	C3	NA	D	A	Fagus	sylvatica L.	-26.4	NA	-28.8	NA	NA	NA	NA
Lockheart1997	outdoor	UK	leaves	C3	NA	D	A	Fagus	sylvatica L.	-28	NA	-30.7	NA	NA	NA	NA
Lockheart1997	outdoor	UK	leaves	C3	NA	D	A	Quercus	robur	-28.7	-33.5	-34.3	-35.4	NA	NA	NA
Lockheart1997	outdoor	UK	leaves	C3	NA	D	A	Quercus	robur	-30.2	-34.3	-35.6	-36.8	NA	NA	NA
Collister1994	outdoor	UK	leaves	CAM	NA	NA	A	Selenecereus	grandiflorus	-13	-25.1	-25.1	-27.1	-26.4	-26.2	-28.5
Collister1994	outdoor	UK	leaves	CAM	NA	NA	A	Tillandsia	usneoides	-14.9	-25.2	-25.5	-26.9	-29.2	NA	NA
Collister1994	outdoor	UK	leaves	CAM	NA	NA	A	Aechmeade	albata	-16.2	NA	NA	NA	-25.2	NA	NA
Collister1994	outdoor	UK	leaves	C3	NA	D	A	Psidium	cattleionum	-29.7	NA	NA	-38.6	-38.8	-38.4	NA
Collister1994	outdoor	UK	leaves	C3	NA	D	A	Jacobinia	cornea	-29.6	NA	NA	-36.1	-36.2	NA	NA
Collister1994	outdoor	UK	leaves	C3	NA	D	A	Cyperus	diffusus	-28.9	NA	NA	-36.2	-36.5	-36.8	-37.3
Collister1994	outdoor	UK	leaves	C3	NA	D	A	Dendrocalamus	strictus	-28.5	NA	-34.3	-35.3	-36.4	-37.8	NA
Collister1994	outdoor	UK	leaves	C3	NA	D	A	Cyprus	alternifolius	-27.6	NA	NA	-34.2	-35.3	NA	NA
Collister1994	outdoor	UK	leaves	C3	NA	D	A	Fagus	slyvatica	-29.8	-32.3	-31.3	NA	NA	NA	NA
Collister1994	outdoor	UK	leaves	C3	NA	D	A	Acer	campestre	-30.4	NA	-33.9	-35	-35	-33.6	NA
Collister1994	outdoor	UK	leaves	C3	NA	D	A	Magnolia	delabayi	-28.7	NA	-33.2	-34	-34.3	NA	NA
Collister1994	outdoor	UK	leaves	C3	NA	D	A	Quercus	turneri	-28.8	-33.5	-32.9	-32.9	-35.7	NA	NA
Collister1994	outdoor	UK	leaves	C3	NA	D	A	Quercus	rober	-30.5	NA	-35.2	-36.4	-36.9	NA	NA
Collister1994	outdoor	UK	leaves	C4	NA	NA	A	Saccharum	officinarum	-10.7	NA	-24.8	-24.5	-23.4	-25.8	NA
Collister1994	outdoor	UK	leaves	C4	NA	NA	A	Miscanthuys	sacchariflorum	-11.9	NA	-18.5	-18.4	-18.4	-18.4	NA
Collister1994	outdoor	UK	leaves	C4	NA	NA	A	Zea	mays	-11.2	NA	NA	-20.5	-20.5	NA	NA
Chikaraishi2004	outdoor	Japan	leaves	C3	NA	NA	NA	Cryptomeria	japonica	-26.4	NA	-32.2	-32.3	-30.4	-29.5	-29.8
Chikaraishi2004	outdoor	Japan	leaves	C3	NA	NA	NA	Cryptomeria	japonica	-27.9	-34.4	-32.7	-32.9	-32.5	-31.5	-30.3
Chikaraishi2006	outdoor	Japan	leaves	C3	NA	D	A	Acer	argutum	NA	NA	-35.7	-35.9	-36.4	-34.7	NA
Chikaraishi2006	outdoor	Japan	leaves	C3	NA	D	A	Acer	argutum	NA	NA	-34.9	-35.6	-36	-34	NA
Chikaraishi2006	outdoor	Japan	leaves	C3	NA	D	A	Acer	carpinifolium	NA	NA	-35.5	-35.5	-35.4	-35.2	NA
Chikaraishi2006	outdoor	Japan	leaves	C3	NA	D	A	Acer	carpinifolium	NA	NA	-35.5	-37.3	-37.1	-37	NA
Bi2005	outdoor	China	leaves	CAM	NA	NA	NA	Hylocereus	undatus	NA	NA	NA	NA	-21.8	-21.5	-21.5
Bi2005	outdoor	China	leaves	CAM	NA	NA	NA	Euphorbia	trigona	NA	NA	-24.6	-28.7	-29.4	-29.5	NA
Bi2005	outdoor	China	leaves	CAM	NA	NA	NA	Opuntia	dillenii	NA	NA	-22.7	-24.2	-25.1	NA	NA
Bi2005	outdoor	China	leaves	C3	NA	NA	NA	Euphorbia	pulcherrima	NA	NA	-27.7	-38	-37.4	NA	NA
Bi2005	outdoor	China	leaves	C3	NA	NA	NA	Codiaeum	variegatum	NA	NA	NA	NA	-35.1	-37.2	NA
Bi2005	outdoor	China	leaves	C3	NA	E	A	Ficus	altissima	NA	NA	NA	-33.9	-36.1	-36.7	NA
Bi2005	outdoor	China	leaves	C3	NA	E	A	FIcus	microcarpa	NA	NA	NA	-31	-33.1	-36.5	NA
Bi2005	outdoor	China	leaves	C3	NA	NA	NA	Osmanthus	fragrans	NA	NA	NA	-35.7	-37	-35.2	NA
Bi2005	outdoor	China	leaves	C3	NA	NA	NA	Kigelia	africana	NA	NA	NA	-33.1	-33.3	-33.2	NA
Bi2005	outdoor	China	leaves	C3	NA	NA	NA	Syzygium	cumini	NA	NA	-34.2	-37.2	-35.5	NA	NA
Bi2005	outdoor	China	leaves	C3	NA	NA	NA	Swietenia	mahagoni	NA	NA	NA	-34.1	-35.9	-38.3	NA
Bi2005	outdoor	China	leaves	C3	NA	NA	NA	Pistia	stratiotes	NA	NA	-37.1	-36.6	-37.1	-36.9	NA
Bi2005	outdoor	China	leaves	C3	NA	NA	NA	Caryota	mitis	NA	NA	NA	NA	-35.5	-35.7	NA
Bi2005	outdoor	China	leaves	C3	NA	NA	NA	Cinnamomum	burmanni	NA	NA	-33	-33.3	-37.2	-37.9	NA
Bi2005	outdoor	China	leaves	C3	NA	NA	NA	Araucaria	cunninghamii	NA	NA	NA	-30.1	-30.5	-29.1	NA
Bi2005	outdoor	China	leaves	C3	NA	NA	NA	Alternanthera	dentata	-30.1	NA	-36.3	-36.6	-37.2	-36.9	NA
Bi2005	outdoor	China	leaves	C3	NA	NA	NA	Alternanthera	versicolor	-28.4	NA	NA	-36.7	-37.5	-38.3	NA
Bi2005	outdoor	China	leaves	C3	NA	NA	NA	Alternanthera	bettzickiana	-27.1	NA	-35.7	-36.5	-37.2	-37.4	NA
Bi2005	outdoor	China	leaves	C3	NA	NA	NA	Holmskioldia	sanguinea	-28.2	NA	-34.5	-35.3	-33.8	-34.4	-36.9
Bi2005	outdoor	China	leaves	C4	NA	NA	NA	Zea	mays	-10.8	-23.4	-21.7	-21.3	-22.1	-23.5	NA
Bi2005	outdoor	China	leaves	C4	NA	NA	NA	Amaranthus	tricolor	-13.7	-24.1	-24.3	-25.8	-23.4	NA	NA
Bi2005	outdoor	China	leaves	C4	NA	NA	NA	Amaranthus	paniculatus	-14	-24.2	-25.1	-25.4	-22.9	NA	NA
Bi2005	outdoor	China	leaves	C4	NA	NA	NA	Imperata	cylindrica	-13.1	-22	-22.1	-21	-19.2	-19.6	-19.9
Bi2005	outdoor	China	leaves	C4	NA	NA	NA	Bothriochloa	ischaemum	-12.8	-20.3	-20.7	-21	-22.1	-22.4	-23.1
Bi2005	outdoor	China	leaves	C4	NA	NA	NA	Zoysia	japonica	-13.6	NA	-23.5	-24.1	-23.4	-23.1	-24.2
Bi2005	outdoor	China	leaves	C4	NA	NA	NA	Saccharum	sinense	NA	-14.7	-14.1	-15.3	-16.7	NA	NA
Diefendorf2011	outdoor	PA	leaves	C3	NA	D	A	Liquidambar	styraciflua	-28.1	-31	-31.3	-32.1	-34	NA	NA
Diefendorf2011	outdoor	PA	leaves	C3	NA	E	A	Ilex	opaca	-29.7	NA	-35.2	-36	-35	NA	NA
Diefendorf2011	outdoor	PA	leaves	C3	NA	D	A	Betula	papyrifera	-28.9	-32.4	-32.5	-33.4	-35.1	-35.4	NA
Diefendorf2011	outdoor	PA	leaves	C3	NA	D	A	Carpinus	betulus	-29.8	NA	NA	-35.6	-34.2	NA	NA
Diefendorf2011	outdoor	PA	leaves	C3	NA	D	A	Carpinus	betulus	-27.4	NA	NA	-32	-31.7	NA	NA
Diefendorf2011	outdoor	PA	leaves	C3	NA	D	A	Celtis	occidentalis	-27	NA	NA	-31.6	NA	NA	NA
Diefendorf2011	outdoor	PA	leaves	C3	NA	D	A	Cercidiphyllum	japonicum	-29.4	NA	-30.9	-30.7	-29.5	NA	NA
Diefendorf2011	outdoor	PA	leaves	C3	NA	D	A	Cornus	florida	-28.7	NA	-33.1	-33.1	NA	NA	NA
Diefendorf2011	outdoor	PA	leaves	C3	NA	D	A	Nyssia	sylvatica	-29.1	NA	NA	-38.9	-37.4	NA	NA
Diefendorf2011	outdoor	PA	leaves	C3	NA	E	G	Cryptomeria	japonica	-25.1	NA	NA	NA	NA	-26.9	-25.9
Diefendorf2011	outdoor	PA	leaves	C3	NA	D	G	Metasequoia	glypotstroboides	-28.6	-30.9	-31.5	-32	-32.5	-32.2	NA
Diefendorf2011	outdoor	PA	leaves	C3	NA	D	G	Taxodium	distichum	-26.3	NA	NA	NA	NA	NA	NA
Diefendorf2011	outdoor	PA	leaves	C3	NA	E	G	Thuja	occidentalis	-26.1	NA	NA	NA	NA	NA	NA
Diefendorf2011	outdoor	PA	leaves	C3	NA	E	A	Kalmia	latifolia	-30.3	NA	NA	-30.7	-31.4	-32.3	NA
Diefendorf2011	outdoor	PA	leaves	C3	NA	E	A	Rhododendron	maximum	-27.3	NA	NA	-31.7	-31.7	-32.3	NA
Diefendorf2011	outdoor	PA	leaves	C3	NA	D	A	Gleditsia	triacanthos	-28.5	NA	-36	-36.4	-36.4	NA	NA
Diefendorf2011	outdoor	PA	leaves	C3	NA	D	A	Fagus	grandifolia	-29.3	NA	-31.4	NA	NA	NA	NA
Diefendorf2011	outdoor	PA	leaves	C3	NA	D	A	Quercus	alba	-29.7	-33.5	-35	-35.8	-36.6	NA	NA
Diefendorf2011	outdoor	PA	leaves	C3	NA	D	G	Ginkgo	biloba	-28	NA	NA	NA	NA	NA	NA
Diefendorf2011	outdoor	PA	leaves	C3	NA	D	A	Hamanelis	virginiana	-28.6	-32.1	-32.3	-31.7	-31.7	NA	NA
Diefendorf2011	outdoor	PA	leaves	C3	NA	D	A	Carya	ovata	-29.2	NA	-33.1	-31.5	-34.1	-35.1	NA
Diefendorf2011	outdoor	PA	leaves	C3	NA	D	A	Pterocarya	fraxinifolina	-30.8	NA	-35.8	-35.1	-35.2	NA	NA
Diefendorf2011	outdoor	PA	leaves	C3	NA	D	A	Sassafras	albidum	-29.4	-33.1	-33.7	-34.7	NA	NA	NA
Diefendorf2011	outdoor	PA	leaves	C3	NA	D	A	Magnolia	virginiana	-30.1	NA	-34.6	-33.7	NA	NA	NA
Diefendorf2011	outdoor	PA	leaves	C3	NA	D	A	Tilia	cordata	-29.9	-34	-33.6	-32.1	-32.7	NA	NA
Diefendorf2011	outdoor	PA	leaves	C3	NA	E	G	Abies	concolor	-27.7	-29.5	-29.2	-28.5	NA	NA	NA
Diefendorf2011	outdoor	PA	leaves	C3	NA	E	G	Cedrus	atlantica	-28.5	-31	-30.2	-29.2	-30.2	NA	NA
Diefendorf2011	outdoor	PA	leaves	C3	NA	D	G	Larix	decidua	-25.8	-29.2	-29.3	-29.7	-29.8	-29.2	NA
Diefendorf2011	outdoor	PA	leaves	C3	NA	E	G	Picea	abies	-27.3	NA	NA	NA	NA	NA	NA
Diefendorf2011	outdoor	PA	leaves	C3	NA	E	G	Pinus	flexilis	-27	NA	NA	NA	NA	NA	NA
Diefendorf2011	outdoor	PA	leaves	C3	NA	E	G	Pinus	sylvestris	-29.9	NA	NA	NA	NA	NA	NA
Diefendorf2011	outdoor	PA	leaves	C3	NA	E	G	Pseudotsuga	menziesii	-28.4	-29.7	-30.1	-30.2	-29.5	NA	NA
Diefendorf2011	outdoor	PA	leaves	C3	NA	D	A	Platanus	occidentalis	-28.9	-34.8	-34	-34.2	-33.9	-34	NA
Diefendorf2011	outdoor	PA	leaves	C3	NA	D	A	Populus	deltoides	-28.7	-33.1	-33	-32.2	-32.7	-34.2	NA
Diefendorf2011	outdoor	PA	leaves	C3	NA	D	A	Salix	babylonica	-30	-33.7	-32.4	-31.7	-31.3	NA	NA
Diefendorf2011	outdoor	PA	leaves	C3	NA	D	A	Acer	rubrum	-28.1	-33	-32.7	-31.2	-31.7	-31.6	NA
Diefendorf2011	outdoor	PA	leaves	C3	NA	D	A	Aesculus	glabra	-27	NA	-35.2	-35.8	-35.2	NA	NA
Diefendorf2011	outdoor	PA	leaves	C3	NA	D	A	Koelreuteria	paniculata	-27.8	NA	NA	-34.5	-35	-35.7	NA
Diefendorf2011	outdoor	PA	leaves	C3	NA	D	A	Ulmus	americana	-28.5	NA	-32.3	-31.3	-32.5	NA	NA
Diefendorf2011	outdoor	PA	leaves	C3	NA	D	A	Zelkova	serrata	-29.9	NA	NA	-34.6	-35.8	NA	NA
Diefendorf2011	outdoor	Panama	leaves	C3	NA	E	A	Aspidosperma		-28.5	NA	NA	NA	NA	NA	NA
Diefendorf2011	outdoor	Panama	leaves	C3	NA	E	A	Calophyllum		-29.2	NA	NA	NA	NA	NA	NA
Diefendorf2011	outdoor	Panama	leaves	C3	NA	E	A	Manilkara		-28.5	NA	NA	NA	NA	NA	NA
Diefendorf2011	outdoor	WY-CF	leaves	C3	NA	D	A	Populus	angustifolia	-27.9	NA	-33.7	NA	-33.2	-32.5	NA
Diefendorf2011	outdoor	WY-CF	leaves	C3	NA	D	A	Salix	alba	-26.9	-30.7	-30.2	-29.3	-29.5	NA	NA
Diefendorf2011	outdoor	WY-CG	leaves	C3	NA	E	G	Juniperus	osteosperma	-24.4	NA	NA	-32.2	-31.5	-30.5	-29.1
Krull2006	outdoor	Australia	leaves	C3	NA	NA	A	Acacia		-28	NA	-34.9	-35.8	-36	NA	NA
Krull2006	outdoor	Australia	leaves	C4	NA	NA	A	Sporobulus		-14.2	NA	NA	NA	NA	NA	NA
Krull2006	outdoor	Australia	leaves	C4	NA	NA	A	Enchylaena		-13.5	NA	NA	NA	NA	NA	NA
Krull2006	outdoor	Australia	leaves	C3	NA	NA	A	Atalaya		-26.6	NA	-33.7	-35.6	-31.9	NA	NA
Krull2006	outdoor	Australia	leaves	C4	NA	NA	A	Aristida		-14	NA	NA	NA	NA	NA	NA
Krull2006	outdoor	Australia	leaves	C4	NA	NA	A	Enneapogon		-14.3	NA	NA	NA	NA	NA	NA
Krull2006	outdoor	Australia	leaves	C4	NA	NA	A	Astrebla		-14.4	NA	-23.2	-25.1	-26.5	NA	NA
Krull2006	outdoor	Australia	leaves	C4	NA	NA	A	Iseilema		-13.4	NA	-23.5	-22.7	-23.8	NA	NA
Krull2006	outdoor	Australia	leaves	C4	NA	NA	A	Panicum		-13.9	NA	-23.5	-22.7	-23.8	NA	NA
Chikaraishi2003	outdoor	Japan	leaves	C4	NA	NA	NA	Zea	mays	-12.7	-23.8	-21	-20.9	-21.7	-21.1	-19.8
Chikaraishi2003	outdoor	Japan	leaves	C3	NA	NA	NA	Quercus	acutissima	-32	-34.6	-35.5	-34.7	-34.8	-35.9	NA
Chikaraishi2003	outdoor	Japan	leaves	C4	NA	NA	NA	Zoysia	japonica	-13.5	NA	NA	-24.1	-24.2	-22.3	-22.6
Chikaraishi2003	outdoor	Japan	leaves	C3	NA	NA	NA	Camellia	sasanqua	-28.6	-32.7	-32.5	-31.3	-33.1	NA	NA
Chikaraishi2003	outdoor	Japan	leaves	C3	NA	NA	NA	Chamaecyparis	obtusa	-28.3	NA	-31.1	-30.6	-30	-29.2	-27.6
Chikaraishi2003	outdoor	Japan	leaves	C3	NA	NA	NA	Pinus	thunbergii	-26	-32	-32.7	-33.5	-34.1	-34.6	NA
Chikaraishi2003	outdoor	Japan	leaves	CAM	NA	NA	NA	Colocasia	esculenta	-27.1	NA	-34.1	-33.2	-34	-37.2	NA
Chikaraishi2003	outdoor	Japan	leaves	CAM	NA	NA	NA	Lycoris	radiata	-21.9	NA	NA	-28	-27.8	NA	NA
Chikaraishi2003	outdoor	Japan	leaves	C4	NA	NA	NA	Miscanthus	sinensis	-10.1	-17.6	-16.7	-17.2	-17.3	-18	-19
Chikaraishi2003	outdoor	Japan	leaves	C4	NA	NA	NA	Saccharum	officinarum	-12.6	-20.4	-20.2	-20.6	-20.7	-22.3	-23.1
Chikaraishi2003	outdoor	Japan	leaves	C3	NA	NA	NA	Albizia	julibrissin	-33.3	-34.6	-35.8	-35.9	-37.8	-36.1	NA
Chikaraishi2003	outdoor	Japan	leaves	C3	NA	NA	NA	Benthamidia	japonica	-34.3	-38.1	-37.2	-36.5	-36.5	NA	NA
Chikaraishi2003	outdoor	Japan	leaves	C3	NA	NA	NA	Cryptomeria	japonica	-26.4	NA	-32.2	-32.3	-30.4	-29.5	-29.8
Chikaraishi2003	outdoor	Japan	leaves	C3	NA	NA	NA	Acer	carpinifolium	-31.8	-35.5	-35.5	-35.5	-35.4	-35.2	NA
Chikaraishi2003	outdoor	Japan	leaves	C3	NA	NA	NA	Acer	argutum	-34.2	-36.2	-35.7	-35.9	-36.4	-34.7	NA
Chikaraishi2003	outdoor	Japan	leaves	C3	NA	NA	NA	Phrogmites	communis	-32.3	-35.3	-34.9	-34.6	-38.1	-39	NA
Chikaraishi2003	outdoor	Japan	leaves	C3	NA	NA	NA	Benthamidia	japonica	-35.6	-38.1	-38.8	-38.8	-37.3	NA	NA
Chikaraishi2003	outdoor	Japan	leaves	C3	NA	NA	NA	Prunus	jamasakura	-32	-35.2	-33.9	-34.2	-33.5	-33.2	NA
Chikaraishi2003	outdoor	Japan	leaves	C3	NA	NA	NA	Cryptomeria	japonica	-27.9	-34.4	-32.7	-32.9	-32.5	-31.5	-30.3
Chikaraishi2003	outdoor	Japan	leaves	C3	NA	NA	NA	Acer	carpinifolium	-33.8	NA	-35.5	-37.3	-37.1	-37	NA
Chikaraishi2003	outdoor	Japan	leaves	C3	NA	NA	NA	Acer	argutum	-34.8	-34.6	-34.9	-35.6	-36	-34
Chikaraishi2003	outdoor	Japan	leaves	C3	NA	NA	NA	Taraxacum	officinale	-32.7	-35.8	-36	-37	-36.4	-36	NA
Chikaraishi2003	outdoor	Japan	leaves	C3	NA	NA	NA	Plantago	asiatica	-36.2	-38.6	-39	-39.6	-39.8	-40.3	NA
Chikaraishi2003	outdoor	Japan	leaves	C3	NA	NA	NA	Artemisia	princeps	-32.2	-36.7	-35.9	-36.5	-35.2	-35.4	NA
Chikaraishi2003	outdoor	Japan	leaves	C4	NA	NA	NA	Miscanthus	sinensis	-11.2	-17.6	-17.1	-17.5	-18.6	-18.9	-18.1
Chikaraishi2003	outdoor	Japan	leaves	C3	NA	NA	NA	Acer	palmatum	-37.5	-36.9	-38.5	-40.5	-41.8	-41.7	NA
Chikaraishi2003	outdoor	Japan	leaves	C3	NA	NA	NA	Quercus	mongolica	-29.7	-33.6	-33.2	-33.4	-32.2	-32.9	NA
Chikaraishi2003	outdoor	Japan	leaves	C3	NA	NA	NA	Quercus	dentata	-30.9	-34.9	-34.1	-33.5	-34.4	NA	NA
Chikaraishi2003	outdoor	Thailand	leaves	C3	NA	NA	NA	Manihot	utilissima	-28.5	NA	-25	-30.8	-32	-30.7	NA
Chikaraishi2003	outdoor	Thailand	leaves	C4	NA	NA	NA	Saccharum	officinarum	-12	NA	-23	-20	-19.3	-20.1	-21.1
Chikaraishi2003	outdoor	Thailand	leaves	C4	NA	NA	NA	Sorghum	bicolor	-12.1	NA	-22.7	-18.9	-19.6	-19.8	-19.8
Chikaraishi2003	outdoor	Thailand	leaves	CAM	NA	NA	NA	Ananas	comsus	-13.6	NA	-22.9	-21.7	-20.5	-20.5	-22
Chikaraishi2003	outdoor	Japan	leaves	fern	NA	NA	NA	Pterophyta		-32	NA	-34.9	-36	-36.9	-37.4	NA
