# Supplementary material
Source: Frontiers journal article supplement (https://www.frontiersin.org/articles/260772)
Supplement: Data_Sheet_2.XLSX [file Data_Sheet_2.XLSX]

## Sheet: Sheet1
DC_number	LA_number	genotype	other	harvest_date	count
DC77	LA3475	cvM82
DC07	LA4028	IL1-1
DC06	LA4029	IL1-1-2
DC05	LA4030	IL1-1-3
DC04	LA4031	IL1-2
DC03	LA4032	IL1-3
DC02	LA4033	IL1-4
DC01	LA4034	IL1-4-18
DC64	LA4087	IL10-1
DC63	LA4088	IL10-1-1
DC62	LA4089	IL10-2
DC61	LA4090	IL10-2-2
DC60	LA4091	IL10-3
DC69	LA4092	IL11-1
DC68	LA4093	IL11-2
DC67	LA4094	IL11-3
DC66	LA4095	IL11-4
DC65	LA4096	IL11-4-1
DC76	LA4097	IL12-1
DC75	LA4098	IL12-1-1
DC74	LA4099	IL12-2
DC73	LA4100	IL12-3
DC72	LA4101	IL12-3-1
DC71	LA4102	IL12-4
DC70	LA4103	IL12-4-1
DC15	LA4035	IL2-1
DC14	LA4036	IL2-1-1
DC13	LA4037	IL2-2
DC12	LA4038	IL2-3
DC11	LA4039	IL2-4
DC10	LA4040	IL2-5
DC09	LA4041	IL2-6
DC08	LA4042	IL2-6-5
DC20	LA4043	IL3-1
DC19	LA4044	IL3-2
DC18	LA3488	IL3-3
DC17	LA4046	IL3-4
DC16	LA4047	IL3-5
DC26	LA4048	IL4-1
DC25	LA4049	IL4-1-1
DC24	LA4050	IL4-2
DC23	LA4051	IL4-3
DC22	LA4052	IL4-3-2
DC21	LA4053	IL4-4
DC31	LA4054	IL5-1
DC30	LA4055	IL5-2
DC29	LA4056	IL5-3
DC28	LA4057	IL5-4
DC27	LA4058	IL5-5
DC36	LA3500	IL6-1
DC35	LA4060	IL6-2
DC34	LA4061	IL6-2-2
DC33	LA4062	IL6-3
DC32	LA4063	IL6-4
DC43	LA4064	IL7-1
DC42	LA4065	IL7-2
DC41	LA4066	IL7-3
DC40	LA4067	IL7-4
DC37	LA4068	IL7-4-1
DC39	LA4069	IL7-5
DC38	LA4070	IL7-5-5
DC50	LA4071	IL8-1
DC49	LA4072	IL8-1-1
DC48	LA4073	IL8-1-3
DC47	LA4074	IL8-2
DC46	LA4075	IL8-2-1
DC45	LA4076	IL8-3
DC44	LA4077	IL8-3-1
DC59	LA4078	IL9-1
DC58	LA4079	IL9-1-2
DC57	LA4080	IL9-1-3
DC56	LA4081	IL9-2
DC54	LA4082	IL9-2-5
DC55	LA4083	IL9-2-6
DC53	LA4084	IL9-3
DC52	LA4085	IL9-3-1
DC51	LA4086	IL9-3-2
DC78	LA0716	Spennellii
