# Supplementary material
Source: Frontiers journal article supplement (https://www.frontiersin.org/articles/260772)
Supplement: Data_Sheet_3.XLSX [file Data_Sheet_3.XLSX]

## Sheet: DailyAverage
Minimum	-18.04	397.64
Maximum	-14.73	439.53
Average	-16.4078	409.958
Date	d13Cco2_dailyavg	ppmCO2_dailyavg
2013-12-19	-16.31	405.13
2013-12-20	-16.36	401.23
2013-12-21	-16.55	412.37
2013-12-22	-16.04	407.15
2013-12-23	-14.84	397.64
2013-12-24	-15.02	400.56
2013-12-25	-14.92	404.56
2013-12-26	-14.92	403.41
2013-12-27	-15.19	408.14
2013-12-28	-15.27	408.91
2013-12-29	-14.87	403.39
2013-12-30	-14.94	399.36
2013-12-31	-15.38	407.61
2014-01-15	-17.17	399.9
2014-01-16	-17.25	406.63
2014-01-17	-17.18	399.89
2014-01-18	-17.55	408.57
2014-01-19	-17.13	402.01
2014-01-20	-17.25	405.7
2014-01-21	-17.56	402.3
2014-01-22	-17.94	408.74
2014-01-23	-17.53	400.48
2014-01-24	-18.04	413.05
2014-01-25	-17.33	402.86
2014-01-26	-17.32	404.38
2014-01-27	-17.1	399.08
2014-01-28	-17.02	401.92
2014-01-29	-17.84	414.2
2014-01-30	-17.38	406.19
2014-01-31	-17.69	415.05
2014-02-01	-17.9	420.94
2014-02-02	-16.9	409.34
2014-02-03	-16.96	415.17
2014-02-04	-17.69	424.61
2014-02-05	-16.96	413.48
2014-02-06	-16.06	406.46
2014-02-07	-16.79	421.54
2014-02-08	-16.76	423.98
2014-02-09	-16.51	424.06
2014-02-10	-15.79	408.57
2014-02-11	-16.49	424.04
2014-02-12	-17.18	437.8
2014-02-13	-17.24	439.53
2014-02-14	-16.08	413.27
2014-02-15	-15.8	414.59
2014-02-16	-15.23	412.58
2014-02-17	-15.81	416.64
2014-02-18	-15.2	408.81
2014-02-19	-15.14	408.22
2014-02-20	-15.47	407.32
2014-02-21	-14.73	401.18
2014-02-22	-15.24	411.51
2014-02-23	-15.43	409.99
2014-02-24	-15.77	413.7

## Sheet: Hourly
DATE	TIME	FRAC_DAYS_SINCE_JAN1	Delta_5min	CO2_ppm
2013-12-19	00:56:00.681000	351.789	-16.0953	408.602
2013-12-19	01:56:06.903000	351.831	-16.3368	408.495
2013-12-19	02:56:10.881000	351.872	-16.2711	408.19
2013-12-19	03:56:16.454000	351.914	-16.4251	406.692
2013-12-19	04:56:21.502000	351.956	-16.3779	406.522
2013-12-19	05:56:27.111000	351.998	-16.4226	405.599
2013-12-19	06:56:33.858000	352.039	-16.1614	403.793
2013-12-19	07:56:38.073000	352.081	-16.6681	402.388
2013-12-19	08:56:44.559000	352.123	-16.2944	401.065
2013-12-19	09:56:50.575000	352.164	-16.022	399.928
2013-12-20	00:58:09.204000	352.79	-16.2957	398.598
2013-12-20	01:58:14.936000	352.832	-16.4593	398.893
2013-12-20	03:58:24.765000	352.916	-16.4031	399.72
2013-12-20	05:58:33.881000	352.999	-16.2015	398.65
2013-12-20	06:58:40.043000	353.041	-16.3056	398.02
2013-12-20	07:58:45.651000	353.082	-16.1993	397.923
2013-12-20	08:58:50.648000	353.124	-16.373	398.161
2013-12-20	09:58:54.614000	353.166	-16.1068	396.846
2013-12-20	10:58:58.706000	353.208	-16.2201	396.272
2013-12-20	11:59:04.154000	353.249	-16.0353	395.183
2013-12-20	12:59:09.282000	353.291	-16.3792	394.816
2013-12-20	13:59:14.901000	353.333	-16.4611	395.7
2013-12-20	14:59:21.562000	353.375	-16.2567	397.614
2013-12-20	15:59:26.470000	353.416	-16.194	397.312
2013-12-20	16:59:32.253000	353.458	-16.1105	395.01
2013-12-20	17:59:37.276000	353.5	-16.0346	394.675
2013-12-20	18:59:42.954000	353.541	-16.3247	395.486
2013-12-20	19:59:48.627000	353.583	-16.9739	422.446
2013-12-20	20:59:52.132000	353.625	-16.8496	417.551
2013-12-20	21:59:57.628000	353.667	-16.6285	416.646
2013-12-20	23:00:03.013000	353.708	-16.8178	420.374
2013-12-21	00:00:08.901000	353.75	-16.6975	421.787
2013-12-21	01:00:13.674000	353.792	-16.5732	420.657
2013-12-21	02:00:19.861000	353.834	-16.7096	416.222
2013-12-21	03:00:23.921000	353.875	-16.5991	414.35
2013-12-21	04:00:29.157000	353.917	-16.2729	411.279
2013-12-21	05:00:34.059000	353.959	-16.3677	408.822
2013-12-21	06:00:37.664000	354	-16.491	407.914
2013-12-21	07:00:43.381000	354.042	-16.206	407.047
2013-12-21	08:00:49.526000	354.084	-16.2821	406.393
2013-12-21	09:00:54.951000	354.126	-16.4907	405.623
2013-12-21	10:01:00.322000	354.167	-16.3829	405.449
2013-12-21	11:01:04.072000	354.209	-16.4777	404.852
2013-12-21	13:01:14.977000	354.293	-16.6617	413.525
2013-12-21	14:01:20.486000	354.334	-16.7365	412.589
2013-12-21	15:01:24.805000	354.376	-16.7168	412.217
2013-12-21	16:01:28.628000	354.418	-16.5266	413.49
2013-12-21	17:01:34.427000	354.459	-16.5782	416.477
2013-12-21	18:01:38.658000	354.501	-16.766	413.992
2013-12-21	19:01:43.641000	354.543	-16.8402	421.272
2013-12-21	21:01:54.279000	354.626	-16.3684	410.256
2013-12-21	22:01:58.997000	354.668	-16.7675	415.602
2013-12-21	23:02:04.798000	354.71	-17.4283	420.706
2013-12-22	00:02:10.025000	354.752	-16.8087	417.341
2013-12-22	01:02:16.055000	354.793	-16.4256	413.687
2013-12-22	02:02:21.634000	354.835	-16.5889	413.289
2013-12-22	03:02:27.224000	354.877	-16.036	411.17
2013-12-22	04:02:32.655000	354.918	-16.3519	411.412
2013-12-22	05:02:37.334000	354.96	-16.1685	409.816
2013-12-22	06:02:40.828000	355.002	-16.3509	409.508
2013-12-22	07:02:45.767000	355.044	-16.1898	408.354
2013-12-22	08:02:51.477000	355.085	-15.9923	407.696
2013-12-22	09:02:56.956000	355.127	-16.211	407.531
2013-12-22	10:03:02.971000	355.169	-16.2391	407.478
2013-12-22	11:03:09.642000	355.211	-16.1746	407.288
2013-12-22	12:03:15.947000	355.252	-16.3111	407.851
2013-12-22	13:03:21.578000	355.294	-16.262	406.875
2013-12-22	14:03:25.756000	355.336	-15.9833	405.865
2013-12-22	15:03:31.275000	355.377	-15.9508	404.633
2013-12-22	16:03:35.960000	355.419	-15.792	402.34
2013-12-22	17:03:42.091000	355.461	-15.8857	404.51
2013-12-22	18:03:47.101000	355.503	-15.9045	403.074
2013-12-22	19:03:53.367000	355.544	-15.6897	403.281
2013-12-22	20:03:58.834000	355.586	-15.5899	406.113
2013-12-22	21:04:04.019000	355.628	-15.2321	402.801
2013-12-22	22:04:09.594000	355.67	-15.036	401.66
2013-12-22	23:04:13.658000	355.711	-15.7443	398.127
2013-12-23	00:04:17.838000	355.753	-15.5581	398.139
2013-12-23	02:04:26.795000	355.836	-14.6445	399.446
2013-12-23	03:04:32.494000	355.878	-14.8046	398.395
2013-12-23	04:04:37.799000	355.92	-14.7053	397.5
2013-12-23	05:04:41.591000	355.962	-14.6734	395.516
2013-12-23	06:04:47.513000	356.003	-14.6463	395.13
2013-12-23	07:04:53.898000	356.045	-14.6083	394.36
2013-12-23	08:04:59.042000	356.087	-14.6328	393.828
2013-12-23	09:05:03.872000	356.129	-14.4621	393.609
2013-12-23	10:05:09.405000	356.17	-14.4569	393.344
2013-12-23	11:05:15.242000	356.212	-14.5305	393.692
2013-12-23	12:05:20.078000	356.254	-14.4958	392.795
2013-12-23	13:05:26.529000	356.295	-14.7466	397.771
2013-12-23	14:05:30.380000	356.337	-14.5739	400.995
2013-12-23	15:05:35.602000	356.379	-14.6521	400.582
2013-12-23	16:05:40.484000	356.421	-14.6886	401.57
2013-12-23	17:05:45.099000	356.462	-15.1535	401.878
2013-12-23	18:05:48.546000	356.504	-15.0709	400.642
2013-12-23	19:05:54.069000	356.546	-15.4644	397.748
2013-12-23	20:06:00.888000	356.588	-15.4724	398.224
2013-12-23	21:06:05.805000	356.629	-15.331	398.39
2013-12-23	22:06:12.516000	356.671	-14.9564	398.97
2013-12-23	23:06:17.819000	356.713	-14.8678	399.799
2013-12-24	00:06:21.519000	356.754	-14.9017	401.05
2013-12-24	01:06:26.322000	356.796	-14.895	399.012
2013-12-24	03:06:36.536000	356.88	-14.7202	397.332
2013-12-24	04:06:42.006000	356.921	-14.543	396.032
2013-12-24	05:06:45.486000	356.963	-14.6969	395.411
2013-12-24	06:06:50.315000	357.005	-14.5016	394.917
2013-12-24	07:06:54.101000	357.046	-14.7562	394.836
2013-12-24	08:06:58.757000	357.088	-14.7937	394.889
2013-12-24	09:07:04.427000	357.13	-14.7917	394.523
2013-12-24	10:07:10.053000	357.172	-14.4171	395.531
2013-12-24	11:07:15.553000	357.213	-14.5611	396.306
2013-12-24	12:07:21.099000	357.255	-14.7054	396.907
2013-12-24	13:07:24.680000	357.297	-14.899	403.287
2013-12-24	14:07:30.752000	357.339	-15.0852	403.239
2013-12-24	15:07:35.115000	357.38	-15.1597	404.766
2013-12-24	16:07:39.834000	357.422	-15.3255	405.498
2013-12-24	17:07:45.982000	357.464	-14.9941	402.461
2013-12-24	18:07:52.174000	357.505	-15.6385	406.157
2013-12-24	19:07:57.198000	357.547	-15.4433	402.355
2013-12-24	20:08:03.160000	357.589	-15.8997	405.695
2013-12-24	21:08:07.486000	357.631	-15.5792	405.359
2013-12-24	22:08:11.944000	357.672	-15.5132	408.212
2013-12-24	23:08:16.720000	357.714	-15.6095	409.005
2013-12-25	00:08:22.012000	357.756	-15.4049	406.742
2013-12-25	01:08:26.494000	357.798	-15.1101	404.341
2013-12-25	02:08:32.434000	357.839	-14.9078	402.429
2013-12-25	03:08:36.634000	357.881	-14.9971	401.478
2013-12-25	04:08:42.171000	357.923	-14.6745	400.252
2013-12-25	05:08:46.006000	357.964	-14.8856	400.601
2013-12-25	06:08:50.088000	358.006	-14.6567	401.277
2013-12-25	07:08:55.355000	358.048	-14.7397	401.084
2013-12-25	09:09:06.308000	358.131	-14.639	402.688
2013-12-25	10:09:11.086000	358.173	-14.7728	402.898
2013-12-25	11:09:17.220000	358.215	-14.6558	403.256
2013-12-25	12:09:23.434000	358.257	-14.5941	403.444
2013-12-25	13:09:28.275000	358.298	-14.7138	403.374
2013-12-25	14:09:33.061000	358.34	-14.9363	406.494
2013-12-25	15:09:38.045000	358.382	-15.3839	407.211
2013-12-25	16:09:42.805000	358.423	-14.9967	410.142
2013-12-25	17:09:50.122000	358.465	-14.8916	408.719
2013-12-25	18:09:53.926000	358.507	-14.8914	401.894
2013-12-25	19:09:59.354000	358.549	-14.9277	401.143
2013-12-25	21:10:11.977000	358.632	-15.1407	407.052
2013-12-25	22:10:16.045000	358.674	-14.9799	410.792
2013-12-25	23:10:20.489000	358.716	-15.2904	413.04
2013-12-26	00:10:25.240000	358.757	-14.8999	404.112
2013-12-26	01:10:31.351000	358.799	-14.48	400.766
2013-12-26	02:10:37.153000	358.841	-14.7322	401.39
2013-12-26	03:10:42.599000	358.882	-14.3957	400.639
2013-12-26	04:10:47.012000	358.924	-14.4284	399.626
2013-12-26	05:10:52.043000	358.966	-14.2898	399.355
2013-12-26	06:10:56.693000	359.008	-14.6904	399.204
2013-12-26	07:11:01.104000	359.049	-14.4918	399.512
2013-12-26	08:11:06.680000	359.091	-14.6924	401.138
2013-12-26	09:11:12.734000	359.133	-14.7638	401.748
2013-12-26	10:11:18.875000	359.175	-14.8152	402.072
2013-12-26	11:11:24.588000	359.216	-14.7191	403.456
2013-12-26	12:11:28.987000	359.258	-14.9303	406.352
2013-12-26	13:11:35.342000	359.3	-15.2229	415.038
2013-12-26	14:11:40.598000	359.341	-15.7675	419.777
2013-12-26	15:11:45.209000	359.383	-15.216	412.713
2013-12-26	16:11:52.196000	359.425	-15.2231	407.06
2013-12-26	17:11:56.979000	359.467	-15.0066	404.495
2013-12-26	18:12:02.476000	359.508	-15.3293	404.928
2013-12-26	19:12:08.674000	359.55	-15.3929	403.094
2013-12-26	20:12:12.553000	359.592	-15.5039	398.878
2013-12-26	21:12:18.220000	359.634	-14.9094	396.921
2013-12-26	22:12:22.464000	359.675	-14.8989	395.649
2013-12-26	23:12:27.591000	359.717	-15.166	403.857
2013-12-27	00:12:33.105000	359.759	-15.0261	410.181
2013-12-27	01:12:38.515000	359.8	-15.4351	412.171
2013-12-27	02:12:43.196000	359.842	-14.7019	404.898
2013-12-27	03:12:49.558000	359.884	-14.6746	404.037
2013-12-27	04:12:55.183000	359.926	-14.7867	402.59
2013-12-27	05:13:00.569000	359.967	-14.7445	400.681
2013-12-27	06:13:07.046000	360.009	-14.6773	400.947
2013-12-27	07:13:11.338000	360.051	-15.0153	406.087
2013-12-27	08:13:15.973000	360.093	-15.0636	407.098
2013-12-27	09:13:20.026000	360.134	-15.2705	407.523
2013-12-27	10:13:23.980000	360.176	-15.0402	406.626
2013-12-27	11:13:29.427000	360.218	-14.9597	404.799
2013-12-27	12:13:34.313000	360.259	-15.1245	408.572
2013-12-27	13:13:39.252000	360.301	-15.2104	413.062
2013-12-27	14:13:43.466000	360.343	-15.4628	411.599
2013-12-27	15:13:49.151000	360.385	-15.2575	409.045
2013-12-27	16:13:53.615000	360.426	-15.3714	418.615
2013-12-27	17:14:00.272000	360.468	-15.629	420.496
2013-12-27	18:14:04.022000	360.51	-15.599	408.91
2013-12-27	19:14:10.607000	360.552	-15.3744	404.17
2013-12-27	20:14:15.259000	360.593	-15.6971	405.002
2013-12-27	21:14:21.858000	360.635	-15.0091	401.208
2013-12-27	22:14:26.493000	360.677	-15.5116	406.824
2013-12-27	23:14:32.950000	360.718	-15.805	420.293
2013-12-28	00:14:38.112000	360.76	-15.3307	418.515
2013-12-28	01:14:43.933000	360.802	-15.5105	416.527
2013-12-28	02:14:49.417000	360.844	-15.597	419.561
2013-12-28	03:14:55.003000	360.885	-15.307	414.338
2013-12-28	04:15:00.063000	360.927	-15.5199	413.147
2013-12-28	05:15:05.296000	360.969	-15.2692	410.826
2013-12-28	06:15:10.375000	361.011	-15.2814	410.634
2013-12-28	07:15:15.540000	361.052	-15.1104	409.2
2013-12-28	08:15:20.210000	361.094	-15.1279	411.551
2013-12-28	09:15:25.756000	361.136	-15.3657	409.961
2013-12-28	10:15:29.555000	361.177	-15.4858	411.281
2013-12-28	11:15:33.295000	361.219	-15.4731	412.022
2013-12-28	12:15:37.753000	361.261	-15.5446	408.639
2013-12-28	13:15:41.677000	361.303	-14.9383	407.102
2013-12-28	14:15:49.063000	361.344	-15.0569	407.139
2013-12-28	16:15:58.957000	361.428	-15.5259	415.27
2013-12-28	17:16:03.930000	361.469	-14.9621	402.908
2013-12-28	18:16:08.598000	361.511	-15.1988	399.868
2013-12-28	20:16:18.332000	361.595	-15.5332	398.285
2013-12-28	21:16:23.051000	361.636	-15.0883	396.544
2013-12-28	22:16:27.490000	361.678	-14.8034	399.772
2013-12-28	23:16:32.618000	361.72	-14.9401	402.859
2013-12-29	00:16:38.433000	361.762	-14.4172	402.714
2013-12-29	01:16:42.905000	361.803	-14.6806	403.518
2013-12-29	02:16:48.372000	361.845	-14.746	402.642
2013-12-29	03:16:52.700000	361.887	-14.8344	404.548
2013-12-29	04:16:58.029000	361.928	-14.8635	407.054
2013-12-29	05:17:03.089000	361.97	-15.0385	406.437
2013-12-29	06:17:08.125000	362.012	-15.0927	406.363
2013-12-29	07:17:12.834000	362.054	-15.1379	406.256
2013-12-29	08:17:18.032000	362.095	-15.5928	409.342
2013-12-29	09:17:23.648000	362.137	-15.7074	410.204
2013-12-29	10:17:28.539000	362.179	-15.3337	407.396
2013-12-29	11:17:32.917000	362.221	-15.0616	406.631
2013-12-29	12:17:38.937000	362.262	-14.9756	405.26
2013-12-29	13:17:44.849000	362.304	-14.9682	408.935
2013-12-29	14:17:49.680000	362.346	-14.6501	407.22
2013-12-29	15:17:55.453000	362.387	-14.5473	398.703
2013-12-29	16:18:01.519000	362.429	-14.8616	402.827
2013-12-29	17:18:06.885000	362.471	-14.4989	399.65
2013-12-29	18:18:13.237000	362.513	-14.445	397.37
2013-12-29	19:18:17.760000	362.554	-14.5517	397.782
2013-12-29	20:18:22.325000	362.596	-14.6277	398.171
2013-12-29	21:18:26.611000	362.638	-14.6894	397.653
2013-12-29	22:18:31.471000	362.68	-14.6868	397.207
2013-12-29	23:18:36.364000	362.721	-14.7876	397.378
2013-12-30	00:18:41.826000	362.763	-14.5986	398.303
2013-12-30	01:18:45.339000	362.805	-14.4708	398.032
2013-12-30	02:18:50.132000	362.846	-14.8104	396.86
2013-12-30	03:18:54.982000	362.888	-14.8656	395.686
2013-12-30	04:19:00.328000	362.93	-14.6709	394.265
2013-12-30	05:19:06.165000	362.972	-14.6863	393.362
2013-12-30	06:19:12.716000	363.013	-14.5564	393.216
2013-12-30	07:19:17.809000	363.055	-14.6987	393.615
2013-12-30	08:19:21.917000	363.097	-14.4876	393.318
2013-12-30	09:19:27.318000	363.139	-14.7752	393.37
2013-12-30	10:19:32.644000	363.18	-14.7987	394.557
2013-12-30	11:19:39.237000	363.222	-14.8999	395.69
2013-12-30	12:19:43.959000	363.264	-14.752	398.192
2013-12-30	13:19:49.132000	363.305	-15.2887	404.071
2013-12-30	14:19:55.401000	363.347	-15.2531	402.544
2013-12-30	15:19:59.563000	363.389	-15.0198	400.405
2013-12-30	16:20:03.974000	363.431	-15.1774	401.729
2013-12-30	17:20:08.910000	363.472	-14.8357	399.609
2013-12-30	18:20:13.980000	363.514	-14.8839	400.676
2013-12-30	19:20:18.917000	363.556	-15.4512	405.401
2013-12-30	20:20:23.477000	363.597	-15.5656	407.848
2013-12-30	21:20:28.931000	363.639	-15.398	406.766
2013-12-30	22:20:33.881000	363.681	-15.2192	406.224
2013-12-30	23:20:39.487000	363.723	-15.4267	410.81
2013-12-31	00:20:42.898000	363.764	-16.1043	421.438
2013-12-31	01:20:46.914000	363.806	-16.3252	422.236
2013-12-31	02:20:52.318000	363.848	-15.8444	416.531
2013-12-31	03:20:57.375000	363.89	-15.7289	415.778
2013-12-31	04:21:02.868000	363.931	-15.6692	412.165
2013-12-31	05:21:08.795000	363.973	-15.5428	408.628
2013-12-31	06:21:14.043000	364.015	-15.1911	404.139
2013-12-31	07:21:18.674000	364.056	-15.217	401.203
2013-12-31	08:21:22.226000	364.098	-15.061	400.026
2013-12-31	09:21:27.536000	364.14	-14.9796	398.87
2013-12-31	10:21:32.710000	364.182	-14.8315	398.224
2013-12-31	11:21:36.894000	364.223	-14.9243	398.288
2013-12-31	12:21:43.372000	364.265	-14.8377	399.754
2013-12-31	13:21:49.687000	364.307	-15.2496	405.164
2013-12-31	14:21:55.029000	364.349	-15.539	407.9
2013-12-31	15:22:01.710000	364.39	-15.25	405.958
2013-12-31	16:22:05.910000	364.432	-15.2201	404.418
2013-12-31	17:22:09.654000	364.474	-15.3093	408.559
2013-12-31	19:22:19.335000	364.557	-14.9132	403.439
2013-12-31	21:22:31.473000	364.641	-15.2857	409.418
2013-12-31	23:22:41.809000	364.724	-15.8538	417.643
2014-01-15	00:51:26.980000	13.7857	-17.2141	401.413
2014-01-15	01:51:32.897000	13.8275	-16.9528	402.196
2014-01-15	02:51:38.124000	13.8692	-17.0859	398.136
2014-01-15	03:51:42.933000	13.9109	-17.4249	397.872
2014-01-16	00:53:32.249000	14.7872	-17.8242	421.481
2014-01-16	01:53:37.029000	14.8289	-18.1279	423.167
2014-01-16	02:53:43.089000	14.8706	-18.1217	419.022
2014-01-16	04:53:53.556000	14.9541	-17.4699	407.527
2014-01-16	05:53:59.604000	14.9958	-17.3573	405.326
2014-01-16	06:54:05.308000	15.0376	-17.481	405.297
2014-01-16	07:54:09.451000	15.0793	-17.5073	405.14
2014-01-16	08:54:15.351000	15.121	-17.5178	404.646
2014-01-16	09:54:20.746000	15.1627	-17.2765	404.265
2014-01-16	10:54:25.002000	15.2045	-17.0509	403.236
2014-01-16	11:54:30.565000	15.2462	-17.014	403.251
2014-01-16	12:54:36.276000	15.2879	-16.7861	400.948
2014-01-16	13:54:41.075000	15.3296	-16.832	406.536
2014-01-16	14:54:47.303000	15.3714	-17.6838	413.542
2014-01-16	15:54:53.168000	15.4131	-17.145	406.801
2014-01-16	16:54:58.782000	15.4548	-16.8411	406.125
2014-01-16	17:55:04.664000	15.4966	-16.9238	404.142
2014-01-16	18:55:09.164000	15.5383	-16.9819	400.646
2014-01-16	19:55:14.308000	15.58	-16.7753	400.252
2014-01-16	20:55:20.509000	15.6218	-16.9423	400.303
2014-01-16	21:55:25.134000	15.6635	-16.8828	402.474
2014-01-16	22:55:31.272000	15.7052	-16.8154	400.944
2014-01-16	23:55:35.884000	15.7469	-17.3113	407.526
2014-01-17	00:55:41.680000	15.7887	-17.3026	404.591
2014-01-17	01:55:46.990000	15.8304	-17.0768	401.011
2014-01-17	02:55:52.565000	15.8721	-16.8786	400.99
2014-01-17	03:55:57.176000	15.9139	-17.1159	400.357
2014-01-17	04:56:02.845000	15.9556	-17.2102	398.441
2014-01-17	05:56:09.101000	15.9973	-17.2164	397.071
2014-01-17	06:56:14.724000	16.0391	-17.5333	398.075
2014-01-17	07:56:19.859000	16.0808	-17.1901	399.514
2014-01-17	08:56:24.973000	16.1225	-17.2223	399.364
2014-01-17	10:56:34.539000	16.206	-17.435	399.633
2014-01-17	11:56:37.948000	16.2477	-17.4939	400.233
2014-01-17	12:56:42.851000	16.2894	-17.3272	402.435
2014-01-17	13:56:47.209000	16.3311	-17.1718	399.956
2014-01-17	14:56:52.368000	16.3728	-16.9135	399.416
2014-01-17	15:56:57.332000	16.4146	-17.0608	399.839
2014-01-17	16:57:02.194000	16.4563	-17.0633	398.468
2014-01-17	18:57:13.145000	16.5397	-17.0674	398.793
2014-01-17	19:57:18.864000	16.5815	-17.0858	397.115
2014-01-17	20:57:24.971000	16.6232	-16.9539	396.751
2014-01-17	21:57:29.921000	16.6649	-17.0371	398.079
2014-01-17	22:57:35.323000	16.7067	-17.2531	400.793
2014-01-17	23:57:41.569000	16.7484	-17.3229	406.727
2014-01-18	00:57:46.861000	16.7901	-17.9083	419.145
2014-01-18	01:57:54.533000	16.8319	-17.521	406.495
2014-01-18	02:57:59.617000	16.8736	-18.0699	411.76
2014-01-18	03:58:04.690000	16.9153	-18.0568	410.876
2014-01-18	04:58:09.642000	16.9571	-18.0722	409.282
2014-01-18	05:58:15.036000	16.9988	-17.9467	409.273
2014-01-18	06:58:19.299000	17.0405	-17.9462	409.483
2014-01-18	07:58:24.232000	17.0822	-17.9788	408.994
2014-01-18	08:58:29.805000	17.124	-18.0357	410.832
2014-01-18	09:58:34.322000	17.1657	-18.2935	411.657
2014-01-18	10:58:39.463000	17.2074	-18.1181	413.729
2014-01-18	11:58:45.496000	17.2491	-18.2198	413.935
2014-01-18	12:58:50.253000	17.2909	-17.7309	412.111
2014-01-18	13:58:54.209000	17.3326	-18.0137	422.537
2014-01-18	14:58:59.558000	17.3743	-16.9283	407.59
2014-01-18	15:59:04.535000	17.416	-16.822	403.491
2014-01-18	16:59:10.165000	17.4578	-17.1839	404.405
2014-01-18	17:59:16.493000	17.4995	-17.3848	408.443
2014-01-18	18:59:21.819000	17.5412	-16.8944	400.64
2014-01-18	19:59:26.252000	17.5829	-16.7427	402.146
2014-01-18	20:59:30.483000	17.6247	-16.6779	406.346
2014-01-18	21:59:34.180000	17.6664	-16.8836	402.865
2014-01-18	22:59:39.572000	17.7081	-16.9503	401.184
2014-01-18	23:59:45.368000	17.7498	-16.9071	398.414
2014-01-19	00:59:50.720000	17.7916	-17.4249	401.048
2014-01-19	01:59:55.946000	17.8333	-17.2163	403.087
2014-01-19	03:00:01.407000	17.875	-17.253	401.903
2014-01-19	04:00:05.095000	17.9167	-17.1358	404.266
2014-01-19	05:00:10.380000	17.9585	-17.172	401.781
2014-01-19	06:00:15.438000	18.0002	-17.495	401.651
2014-01-19	07:00:19.476000	18.0419	-17.4307	400.939
2014-01-19	08:00:24.608000	18.0836	-17.2278	400.351
2014-01-19	09:00:28.911000	18.1253	-17.5575	399.69
2014-01-19	10:00:33.733000	18.1671	-17.4265	399.613
2014-01-19	11:00:38.551000	18.2088	-17.2239	399.022
2014-01-19	12:00:41.956000	18.2505	-17.2884	399.943
2014-01-19	13:00:47.059000	18.2922	-17.6728	406.077
2014-01-19	15:00:59.039000	18.3757	-17.2997	403.027
2014-01-19	16:01:03.657000	18.4174	-17.091	406.046
2014-01-19	17:01:07.487000	18.4591	-17.1027	404.271
2014-01-19	18:01:13.851000	18.5009	-17.1055	405.684
2014-01-19	19:01:17.783000	18.5426	-16.3993	400.576
2014-01-19	20:01:22.674000	18.5843	-16.5538	401.769
2014-01-19	21:01:27.388000	18.626	-16.5894	402.236
2014-01-19	22:01:32.269000	18.6677	-16.4764	401.421
2014-01-19	23:01:36.822000	18.7095	-16.761	399.917
2014-01-20	00:01:43.352000	18.7512	-16.8066	400.668
2014-01-20	01:01:47.779000	18.7929	-17.1874	407.496
2014-01-20	02:01:52.250000	18.8346	-16.8073	403.586
2014-01-20	03:01:56.496000	18.8763	-16.9393	400.065
2014-01-20	04:02:01.635000	18.9181	-17.1074	400.069
2014-01-20	05:02:05.338000	18.9598	-17.0277	406.742
2014-01-20	06:02:09.868000	19.0015	-16.81	403.973
2014-01-20	07:02:14.989000	19.0432	-16.9435	399.724
2014-01-20	08:02:19.223000	19.0849	-16.8784	398.864
2014-01-20	09:02:24.742000	19.1267	-17.0878	399.581
2014-01-20	10:02:30.351000	19.1684	-17.101	401.135
2014-01-20	11:02:34.532000	19.2101	-17.2607	402.974
2014-01-20	12:02:39.740000	19.2518	-17.3949	404.348
2014-01-20	13:02:46.007000	19.2936	-17.5069	412.389
2014-01-20	14:02:49.859000	19.3353	-18.225	415.408
2014-01-20	15:02:53.960000	19.377	-18.1737	415.191
2014-01-20	16:02:58.055000	19.4187	-17.9848	415.25
2014-01-20	17:03:03.657000	19.4605	-17.1544	402.766
2014-01-20	18:03:08.473000	19.5022	-17.0369	402.782
2014-01-20	19:03:13.611000	19.5439	-16.9432	402.275
2014-01-20	20:03:18.438000	19.5856	-16.8589	408.185
2014-01-20	21:03:23.971000	19.6274	-17.433	409.89
2014-01-20	22:03:29.565000	19.6691	-17.7135	416.184
2014-01-20	23:03:35.213000	19.7108	-17.6266	407.157
2014-01-21	00:03:39.210000	19.7525	-17.9485	410.119
2014-01-21	01:03:44.278000	19.7943	-17.4264	407.142
2014-01-21	02:03:47.795000	19.836	-17.481	408.908
2014-01-21	03:03:53.395000	19.8777	-18.0128	412.276
2014-01-21	04:03:57.892000	19.9194	-17.4381	406.391
2014-01-21	05:04:02.779000	19.9611	-17.1578	402.332
2014-01-21	06:04:08.062000	20.0029	-17.1294	400.542
2014-01-21	07:04:12.940000	20.0446	-16.7852	399.704
2014-01-21	08:04:18.016000	20.0863	-17.6363	405.424
2014-01-21	09:04:23.213000	20.128	-17.738	405.872
2014-01-21	10:04:28.940000	20.1698	-18.0374	404.156
2014-01-21	11:04:34.507000	20.2115	-17.7308	401.106
2014-01-21	12:04:39.608000	20.2532	-17.7318	401.643
2014-01-21	13:04:45.259000	20.295	-17.7715	400.384
2014-01-21	14:04:50.217000	20.3367	-17.7341	399.978
2014-01-21	15:04:56.457000	20.3784	-17.7879	399.553
2014-01-21	16:05:02.545000	20.4202	-17.4437	399.34
2014-01-21	17:05:08.005000	20.4619	-17.5376	398.567
2014-01-21	18:05:12.549000	20.5036	-17.5033	398.612
2014-01-21	19:05:18.937000	20.5454	-17.3256	398.917
2014-01-21	20:05:23.878000	20.5871	-17.6678	399.457
2014-01-21	21:05:28.404000	20.6288	-17.3864	396.666
2014-01-21	22:05:33.648000	20.6705	-17.6191	398.059
2014-01-21	23:05:38.776000	20.7123	-17.4603	400.084
2014-01-22	00:05:42.563000	20.754	-17.4037	400.449
2014-01-22	01:05:47.885000	20.7957	-17.8061	403.45
2014-01-22	02:05:52.861000	20.8374	-17.9216	404.021
2014-01-22	03:05:58.502000	20.8791	-18.3281	411.712
2014-01-22	04:06:03.653000	20.9209	-18.5612	413.11
2014-01-22	05:06:08.088000	20.9626	-18.7278	413.86
2014-01-22	06:06:13.569000	21.0043	-18.6024	415.523
2014-01-22	07:06:18.532000	21.046	-18.9866	417.617
2014-01-22	08:06:22.851000	21.0878	-18.4794	419.253
2014-01-22	09:06:27.443000	21.1295	-18.5999	415.861
2014-01-22	10:06:32.418000	21.1712	-18.4989	416.341
2014-01-22	11:06:37.397000	21.2129	-18.3479	415.759
2014-01-22	12:06:42.665000	21.2547	-17.878	416.794
2014-01-22	13:06:48.414000	21.2964	-18.0053	410.091
2014-01-22	14:06:53.641000	21.3381	-17.8514	409.113
2014-01-22	15:06:59.464000	21.3799	-17.9161	409.236
2014-01-22	16:07:03.016000	21.4216	-17.9014	407.607
2014-01-22	17:07:08.279000	21.4633	-17.3663	401.135
2014-01-22	18:07:13.845000	21.505	-17.3498	408.814
2014-01-22	19:07:19.632000	21.5468	-17.1729	400.444
2014-01-22	20:07:24.078000	21.5885	-17.277	400.534
2014-01-22	21:07:29.709000	21.6302	-17.0165	398.336
2014-01-22	22:07:34.878000	21.6719	-17.3017	399.354
2014-01-22	23:07:38.709000	21.7136	-17.2585	401.391
2014-01-23	00:07:43.674000	21.7554	-17.5143	406.352
2014-01-23	01:07:47.536000	21.7971	-17.7405	402.956
2014-01-23	02:07:53.512000	21.8388	-17.6131	402.367
2014-01-23	03:07:58.859000	21.8805	-18.2006	402.512
2014-01-23	04:08:03.890000	21.9223	-18.1303	402.812
2014-01-23	05:08:08.349000	21.964	-17.9568	401.971
2014-01-23	06:08:12.671000	22.0057	-17.7267	400.389
2014-01-23	07:08:17.835000	22.0474	-17.6951	400.897
2014-01-23	08:08:22.194000	22.0891	-17.7545	400.437
2014-01-23	09:08:26.788000	22.1309	-17.4868	399.556
2014-01-23	10:08:31.437000	22.1726	-17.5871	400.272
2014-01-23	11:08:35.058000	22.2143	-17.5554	400.981
2014-01-23	12:08:39.713000	22.256	-17.2978	401.284
2014-01-23	13:08:45.026000	22.2977	-17.4951	400.163
2014-01-23	14:08:50.144000	22.3395	-17.4802	399.787
2014-01-23	15:08:55.020000	22.3812	-17.2251	398.41
2014-01-23	16:09:01.875000	22.4229	-17.2236	399.044
2014-01-23	17:09:06.953000	22.4647	-17.1047	398.267
2014-01-23	18:09:13.184000	22.5064	-17.2677	399.307
2014-01-23	19:09:17.453000	22.5481	-17.1622	398.606
2014-01-23	20:09:22.736000	22.5898	-17.4209	398.63
2014-01-23	21:09:27.802000	22.6316	-17.3032	399.107
2014-01-23	22:09:33.391000	22.6733	-17.4068	398.211
2014-01-23	23:09:36.997000	22.715	-17.2815	399.231
2014-01-24	00:09:42.773000	22.7567	-17.2407	401.124
2014-01-24	01:09:47.476000	22.7985	-17.4779	403.396
2014-01-24	02:09:51.361000	22.8402	-17.4814	406.439
2014-01-24	03:09:55.303000	22.8819	-17.8379	410.301
2014-01-24	04:09:59.714000	22.9236	-17.9317	411.501
2014-01-24	05:10:05.566000	22.9653	-17.8177	413.151
2014-01-24	06:10:11.690000	23.0071	-18.0572	416.706
2014-01-24	07:10:16.588000	23.0488	-18.6428	426.314
2014-01-24	08:10:21.838000	23.0905	-18.9653	428.972
2014-01-24	09:10:27.012000	23.1323	-19.1794	429.255
2014-01-24	10:10:32.484000	23.174	-18.4827	419.216
2014-01-24	11:10:37.404000	23.2157	-18.6463	423.5
2014-01-24	12:10:41.525000	23.2574	-18.3352	415.917
2014-01-24	13:10:48.638000	23.2992	-17.9736	411.373
2014-01-24	14:10:53.220000	23.3409	-18.283	417.021
2014-01-24	15:10:58.655000	23.3826	-18.9367	438.171
2014-01-24	16:11:03.285000	23.4243	-18.0524	407.066
2014-01-24	17:11:07.727000	23.4661	-17.6038	405.056
2014-01-24	18:11:12.141000	23.5078	-18.1757	405.792
2014-01-24	19:11:16.818000	23.5495	-17.7866	402.763
2014-01-24	20:11:22.032000	23.5912	-17.8277	407.022
2014-01-24	21:11:27.357000	23.633	-17.3302	400.467
2014-01-24	22:11:33.359000	23.6747	-17.4014	406.936
2014-01-24	23:11:39.769000	23.7164	-17.4774	405.781
2014-01-25	00:11:44.654000	23.7582	-17.3712	398.209
2014-01-25	01:11:48.272000	23.7999	-17.4619	407.417
2014-01-25	02:11:52.993000	23.8416	-17.2243	402.726
2014-01-25	03:11:57.591000	23.8833	-17.8264	407.821
2014-01-25	04:12:01.049000	23.925	-17.5829	407.108
2014-01-25	05:12:05.868000	23.9667	-17.6016	410.188
2014-01-25	06:12:10.194000	24.0085	-17.548	406.984
2014-01-25	07:12:15.076000	24.0502	-17.6024	408.127
2014-01-25	08:12:19.487000	24.0919	-17.2739	407.102
2014-01-25	09:12:23.049000	24.1336	-17.1961	405.778
2014-01-25	10:12:27.118000	24.1753	-17.3359	404.987
2014-01-25	11:12:31.963000	24.217	-17.1685	403.663
2014-01-25	12:12:38.220000	24.2588	-17.246	401.456
2014-01-25	13:12:44.430000	24.3005	-17.217	399.797
2014-01-25	14:12:49.006000	24.3422	-17.4049	399.069
2014-01-25	15:12:54.365000	24.384	-17.0503	398.27
2014-01-25	16:12:59.733000	24.4257	-16.9403	398.76
2014-01-25	17:13:04.529000	24.4674	-17.1438	399.982
2014-01-25	18:13:07.825000	24.5091	-17.112	399.373
2014-01-25	19:13:12.302000	24.5508	-17.2989	400.186
2014-01-25	20:13:17.052000	24.5926	-17.0316	397.581
2014-01-25	21:13:22.693000	24.6343	-17.4021	399.717
2014-01-25	22:13:28.730000	24.676	-17.4051	401.32
2014-01-25	23:13:33.582000	24.7177	-17.3994	403.082
2014-01-26	00:13:39.138000	24.7595	-17.3632	396.114
2014-01-26	01:13:44.365000	24.8012	-17.4465	400.266
2014-01-26	02:13:48.762000	24.8429	-17.3927	404.407
2014-01-26	03:13:54.533000	24.8847	-17.8965	407.114
2014-01-26	04:13:59.496000	24.9264	-18.2268	411.321
2014-01-26	05:14:04.979000	24.9681	-18.4427	416.917
2014-01-26	06:14:09.380000	25.0098	-18.5344	419.744
2014-01-26	07:14:14.526000	25.0516	-18.6885	418.866
2014-01-26	08:14:19.950000	25.0933	-18.157	417.583
2014-01-26	09:14:26.461000	25.135	-17.907	416.234
2014-01-26	10:14:32.818000	25.1768	-17.159	406.066
2014-01-26	11:14:38.134000	25.2185	-17.2478	403.569
2014-01-26	12:14:43.523000	25.2602	-17.1511	405.65
2014-01-26	13:14:46.950000	25.3019	-16.6352	401.156
2014-01-26	14:14:51.572000	25.3437	-16.7947	401.443
2014-01-26	15:14:55.542000	25.3854	-16.9109	400.428
2014-01-26	16:14:59.921000	25.4271	-17.0219	399.942
2014-01-26	17:15:04.888000	25.4688	-16.8114	397.669
2014-01-26	18:15:10.963000	25.5105	-16.5624	396.817
2014-01-26	19:15:15.361000	25.5523	-16.8463	396.965
2014-01-26	20:15:21.581000	25.594	-16.8354	397.067
2014-01-26	21:15:26.316000	25.6357	-16.3637	393.799
2014-01-26	22:15:31.121000	25.6774	-16.454	397.127
2014-01-26	23:15:36.092000	25.7192	-16.8101	398.788
2014-01-27	00:15:40.509000	25.7609	-16.6286	398.591
2014-01-27	01:15:45.319000	25.8026	-16.9428	399.842
2014-01-27	02:15:49.279000	25.8443	-16.7044	398.12
2014-01-27	03:15:54.263000	25.886	-17.158	401.032
2014-01-27	04:15:59.545000	25.9278	-17.0756	399.389
2014-01-27	05:16:03.753000	25.9695	-16.9476	398.953
2014-01-27	06:16:09.211000	26.0112	-17.0229	399.922
2014-01-27	07:16:14.141000	26.0529	-17.4972	400.751
2014-01-27	08:16:19.644000	26.0947	-17.4672	399.832
2014-01-27	09:16:23.701000	26.1364	-17.1944	397.607
2014-01-27	10:16:28.901000	26.1781	-17.1004	398.306
2014-01-27	11:16:32.980000	26.2198	-17.1785	399.63
2014-01-27	12:16:37.836000	26.2615	-17.1522	398.425
2014-01-27	13:16:43.943000	26.3033	-17.241	399.37
2014-01-27	14:16:48.769000	26.345	-17.2322	401.068
2014-01-27	15:16:53.638000	26.3867	-17.0898	397.018
2014-01-27	16:16:58.079000	26.4285	-17.0305	396.447
2014-01-28	00:17:41.158000	26.7623	-16.9815	397.529
2014-01-28	01:17:46.503000	26.804	-16.9595	398.589
2014-01-28	02:17:51.857000	26.8457	-16.886	400.221
2014-01-28	03:17:58.197000	26.8875	-16.9519	401.984
2014-01-28	04:18:02.822000	26.9292	-16.672	401.938
2014-01-28	05:18:07.528000	26.9709	-16.9753	402.181
2014-01-28	06:18:12.539000	27.0126	-16.8441	403.883
2014-01-28	07:18:16.654000	27.0544	-16.8111	403.142
2014-01-28	08:18:22.996000	27.0961	-16.9598	403.127
2014-01-28	09:18:26.552000	27.1378	-17.0947	402.516
2014-01-28	10:18:32.069000	27.1795	-17.0719	404.017
2014-01-28	11:18:36.888000	27.2213	-16.978	406.184
2014-01-28	12:18:41.713000	27.263	-17.1255	407.291
2014-01-28	13:18:48.145000	27.3047	-17.2289	405.822
2014-01-28	14:18:53.400000	27.3465	-17.0663	405.605
2014-01-28	15:18:57.914000	27.3882	-16.9456	404.636
2014-01-28	16:19:02.415000	27.4299	-16.9443	401.362
2014-01-28	17:19:06.996000	27.4716	-17.0325	401.072
2014-01-28	18:19:13.061000	27.5133	-17.3458	400.477
2014-01-28	19:19:17.611000	27.5551	-17.3483	401.207
2014-01-28	20:19:23.384000	27.5968	-17.4976	398.2
2014-01-28	21:19:28.510000	27.6385	-16.7279	398.072
2014-01-28	22:19:33.757000	27.6803	-17.0216	397.401
2014-01-28	23:19:39.803000	27.722	-16.9209	399.562
2014-01-29	00:19:46.352000	27.7637	-17.2263	401.9
2014-01-29	01:19:52.127000	27.8055	-17.5901	406.911
2014-01-29	02:19:57.617000	27.8472	-17.4663	412.414
2014-01-29	03:20:03.601000	27.8889	-18.0454	418.204
2014-01-29	04:20:08.326000	27.9307	-17.7431	419.913
2014-01-29	05:20:13.667000	27.9724	-18.0243	422.282
2014-01-29	06:20:18.134000	28.0141	-18.2451	425.314
2014-01-29	07:20:22.563000	28.0558	-17.9554	425.441
2014-01-29	08:20:28	28.0975	-18.3101	427.971
2014-01-29	09:20:33.671000	28.1393	-18.367	421.416
2014-01-29	10:20:38.490000	28.181	-18.4839	427.58
2014-01-29	11:20:44.536000	28.2227	-18.4329	423.025
2014-01-29	12:20:50.341000	28.2645	-18.4377	424.481
2014-01-29	13:20:54.094000	28.3062	-18.4218	424.522
2014-01-29	14:20:59.313000	28.3479	-18.369	417.639
2014-01-29	15:21:03.943000	28.3896	-17.548	412.394
2014-01-29	16:21:08.821000	28.4314	-17.422	407.71
2014-01-29	17:21:13.552000	28.4731	-17.5694	406.195
2014-01-29	18:21:18.920000	28.5148	-16.963	400.652
2014-01-29	19:21:23.790000	28.5565	-17.6834	403.34
2014-01-29	20:21:27.815000	28.5982	-17.5806	399.904
2014-01-29	21:21:33.355000	28.64	-17.3381	401.524
2014-01-29	22:21:37.821000	28.6817	-17.7799	406.985
2014-01-29	23:21:43.963000	28.7234	-17.232	403.178
2014-01-30	00:21:49.950000	28.7652	-17.5097	410.531
2014-01-30	01:21:55.434000	28.8069	-17.4628	406.109
2014-01-30	02:22:00.750000	28.8486	-17.5652	405.323
2014-01-30	03:22:06.405000	28.8904	-17.3151	406.537
2014-01-30	04:22:12.733000	28.9321	-17.4177	406.287
2014-01-30	05:22:17.994000	28.9738	-17.4896	405.121
2014-01-30	06:22:23.200000	29.0155	-17.4591	406.19
2014-01-30	07:22:28.608000	29.0573	-17.3494	407.421
2014-01-30	08:22:34.016000	29.099	-17.4104	406.939
2014-01-30	09:22:39.141000	29.1407	-17.7083	408.562
2014-01-30	10:22:42.999000	29.1824	-17.5943	410.029
2014-01-30	11:22:47.380000	29.2242	-17.5718	410.12
2014-01-30	12:22:51.674000	29.2659	-17.2033	407.232
2014-01-30	13:22:56.594000	29.3076	-17.2878	405.713
2014-01-30	14:23:02.171000	29.3493	-17.3248	404.149
2014-01-30	15:23:07.369000	29.3911	-17.0102	405.738
2014-01-30	16:23:13.301000	29.4328	-16.9448	401.361
2014-01-30	17:23:18.760000	29.4745	-17.0314	400.051
2014-01-30	18:23:23.243000	29.5162	-17.0972	398.152
2014-01-30	19:23:28.739000	29.558	-17.2988	403.776
2014-01-30	20:23:33.822000	29.5997	-17.2673	404.145
2014-01-30	21:23:39.263000	29.6414	-17.3612	403.209
2014-01-30	22:23:43.832000	29.6831	-17.6216	410.937
2014-01-30	23:23:49.680000	29.7249	-17.9024	414.988
2014-01-31	00:23:55.269000	29.7666	-17.598	411.344
2014-01-31	01:23:59.276000	29.8083	-17.519	407.917
2014-01-31	02:24:04.938000	29.8501	-17.4188	409.226
2014-01-31	03:24:09.836000	29.8918	-17.27	407.676
2014-01-31	04:24:16.342000	29.9335	-17.5156	410.661
2014-01-31	05:24:20.585000	29.9752	-17.2498	409.272
2014-01-31	06:24:24.903000	30.017	-17.1239	408.377
2014-01-31	07:24:28.921000	30.0587	-17.5344	410.716
2014-01-31	08:24:33.217000	30.1004	-17.7106	413.519
2014-01-31	09:24:37.226000	30.1421	-17.653	417.33
2014-01-31	10:24:42.966000	30.1838	-17.687	413.82
2014-01-31	11:24:48.132000	30.2256	-18.0289	422.016
2014-01-31	12:24:53.282000	30.2673	-17.5869	412.758
2014-01-31	13:24:58.401000	30.309	-17.67	416.575
2014-01-31	14:25:03.569000	30.3507	-17.8959	416.906
2014-01-31	15:25:09.296000	30.3925	-17.883	413.006
2014-01-31	16:25:15.598000	30.4342	-17.7102	414.524
2014-01-31	17:25:20.220000	30.4759	-17.8388	420.284
2014-01-31	18:25:25.207000	30.5177	-18.1061	422.364
2014-01-31	19:25:29.107000	30.5594	-18.0922	423.504
2014-01-31	20:25:35.630000	30.6011	-18.109	428.314
2014-01-31	21:25:40.974000	30.6428	-17.9557	418.568
2014-01-31	22:25:47.058000	30.6846	-17.6117	415.48
2014-01-31	23:25:52.566000	30.7263	-17.7594	417.036
2014-02-01	00:25:56.776000	30.768	-17.4926	415.006
2014-02-01	01:26:01.187000	30.8097	-17.8435	415.486
2014-02-01	02:26:05.178000	30.8514	-17.6475	416.676
2014-02-01	03:26:10.226000	30.8932	-17.9238	418.669
2014-02-01	04:26:15.618000	30.9349	-18.0206	419.904
2014-02-01	05:26:19.851000	30.9766	-17.9472	419.275
2014-02-01	06:26:24.332000	31.0183	-17.888	420.806
2014-02-01	07:26:29.693000	31.0601	-17.97	421.49
2014-02-01	08:26:35.595000	31.1018	-17.8327	422.552
2014-02-01	09:26:42.522000	31.1435	-18.2794	423.557
2014-02-01	10:26:47.576000	31.1853	-17.9661	423.339
2014-02-01	11:26:55.214000	31.227	-18.028	421.267
2014-02-01	12:26:59.696000	31.2687	-17.7996	422.258
2014-02-01	13:27:04.851000	31.3105	-17.8382	419.771
2014-02-01	14:27:09.006000	31.3522	-18.0441	423.57
2014-02-01	15:27:14.332000	31.3939	-18.636	431.529
2014-02-01	16:27:19.871000	31.4356	-18.6191	434.35
2014-02-01	17:27:24.927000	31.4774	-18.8014	433.916
2014-02-01	18:27:28.809000	31.5191	-17.8296	416.441
2014-02-01	19:27:34.464000	31.5608	-17.6996	417.413
2014-02-01	20:27:39.434000	31.6025	-17.502	416.386
2014-02-01	21:27:43.223000	31.6443	-17.4148	414.46
2014-02-01	22:27:48.598000	31.686	-17.2861	417.415
2014-02-01	23:27:52.713000	31.7277	-17.3796	417.086
2014-02-02	00:27:56.941000	31.7694	-17.2198	415.411
2014-02-02	01:28:02.270000	31.8111	-17.4519	415.756
2014-02-02	02:28:06.039000	31.8528	-17.6391	415.032
2014-02-02	03:28:11.688000	31.8946	-17.3726	414.979
2014-02-02	04:28:17.088000	31.9363	-17.6938	415.304
2014-02-02	05:28:23.573000	31.9781	-17.64	417.644
2014-02-02	06:28:27.711000	32.0198	-17.552	418.365
2014-02-02	07:28:33.029000	32.0615	-17.4121	413.88
2014-02-02	08:28:38.059000	32.1032	-17.0266	412.23
2014-02-02	09:28:42.114000	32.1449	-17.0665	411.288
2014-02-02	10:28:48.930000	32.1867	-17.1054	409.644
2014-02-02	11:28:54.928000	32.2284	-16.8857	410.06
2014-02-02	12:28:59.533000	32.2701	-16.4303	406.104
2014-02-02	13:29:03.921000	32.3119	-16.614	405.259
2014-02-02	14:29:09.743000	32.3536	-16.2139	404.366
2014-02-02	15:29:15.401000	32.3953	-16.6221	402.249
2014-02-02	16:29:20.608000	32.437	-16.5283	403.043
2014-02-02	17:29:26.326000	32.4788	-16.4963	403.628
2014-02-02	18:29:31.644000	32.5205	-16.3585	402.705
2014-02-02	19:29:36.062000	32.5622	-16.4869	402.577
2014-02-02	20:29:41.496000	32.604	-16.1359	404.528
2014-02-02	21:29:45.529000	32.6457	-16.6908	407.4
2014-02-02	22:29:49.319000	32.6874	-16.4448	404.597
2014-02-02	23:29:53.884000	32.7291	-16.5959	408.229
2014-02-03	00:29:59.421000	32.7708	-16.3235	403.801
2014-02-03	01:30:04.650000	32.8126	-16.5443	405.274
2014-02-03	02:30:09.848000	32.8543	-16.5448	406.696
2014-02-03	03:30:14.520000	32.896	-16.5306	405.71
2014-02-03	04:30:20.197000	32.9377	-16.5503	408.529
2014-02-03	05:30:24.398000	32.9794	-16.4824	410.919
2014-02-03	06:30:28.670000	33.0212	-16.8634	412.378
2014-02-03	07:30:33.536000	33.0629	-16.6615	412.82
2014-02-03	08:30:38.381000	33.1046	-16.6537	413.672
2014-02-03	09:30:44.040000	33.1463	-16.6157	413.498
2014-02-03	10:30:49.549000	33.1881	-16.7602	415.394
2014-02-03	11:30:54.802000	33.2298	-16.7944	416.433
2014-02-03	12:30:58.687000	33.2715	-16.8341	417.997
2014-02-03	13:31:03.996000	33.3132	-17.2116	419.931
2014-02-03	14:31:10.075000	33.355	-17.1599	422.609
2014-02-03	15:31:15.265000	33.3967	-17.044	424.003
2014-02-03	16:31:19.869000	33.4384	-16.9513	413.077
2014-02-03	17:31:25.456000	33.4802	-17.157	414.646
2014-02-03	18:31:30.474000	33.5219	-17.6827	422.586
2014-02-03	19:31:34.982000	33.5636	-17.6589	420.605
2014-02-03	20:31:39.101000	33.6053	-17.8203	424.932
2014-02-03	21:31:45.371000	33.6471	-17.264	417.514
2014-02-03	22:31:51.868000	33.6888	-17.4532	422.074
2014-02-03	23:31:55.815000	33.7305	-17.4067	419.038
2014-02-04	00:32:00.880000	33.7722	-17.7811	422.483
2014-02-04	01:32:05.821000	33.814	-18.1001	430.03
2014-02-04	02:32:11.213000	33.8557	-18.1111	424.811
2014-02-04	03:32:15.052000	33.8974	-18.2306	426.597
2014-02-04	04:32:19.790000	33.9391	-17.9106	426.873
2014-02-04	05:32:24.411000	33.9808	-17.7969	428.146
2014-02-04	06:32:29.210000	34.0226	-17.5627	427.673
2014-02-04	07:32:33.984000	34.0643	-17.782	425.883
2014-02-04	08:32:38.124000	34.106	-17.5172	424.39
2014-02-04	09:32:42.875000	34.1477	-17.7069	423.642
2014-02-04	10:32:48.177000	34.1894	-17.5556	423.495
2014-02-04	11:32:51.933000	34.2312	-17.5763	425.448
2014-02-04	12:32:57.730000	34.2729	-17.4256	424.272
2014-02-04	13:33:02.878000	34.3146	-17.8935	436.878
2014-02-04	14:33:07.394000	34.3563	-18.1199	446.606
2014-02-04	15:33:13.338000	34.3981	-17.7147	431.35
2014-02-04	16:33:18.204000	34.4398	-17.7023	424.63
2014-02-04	17:33:22.790000	34.4815	-17.2166	416.803
2014-02-04	18:33:28.187000	34.5232	-17.4781	418.041
2014-02-04	19:33:32.845000	34.565	-17.6635	420.691
2014-02-04	20:33:38.174000	34.6067	-17.6842	416.05
2014-02-04	21:33:42.538000	34.6484	-17.5486	419.293
2014-02-04	22:33:45.959000	34.6901	-17.2311	415.141
2014-02-04	23:33:49.990000	34.7318	-17.2109	411.308
2014-02-05	00:33:55.799000	34.7736	-17.3242	413.353
2014-02-05	01:33:59.923000	34.8153	-17.4225	413.805
2014-02-05	02:34:05.631000	34.857	-17.6518	415.183
2014-02-05	03:34:09.403000	34.8987	-17.7095	415.29
2014-02-05	04:34:14.457000	34.9404	-17.5431	418.227
2014-02-05	05:34:19.039000	34.9822	-17.5434	420.318
2014-02-05	06:34:23.970000	35.0239	-17.5905	420.443
2014-02-05	07:34:30.822000	35.0656	-17.4619	420.778
2014-02-05	08:34:36.513000	35.1074	-17.6516	419.189
2014-02-05	09:34:42.457000	35.1491	-17.4891	418.369
2014-02-05	10:34:48.367000	35.1908	-17.7665	424.6
2014-02-05	11:34:51.868000	35.2325	-17.3756	424.648
2014-02-05	12:34:56.897000	35.2743	-16.9238	417.68
2014-02-05	13:35:03.908000	35.316	-16.7929	413.105
2014-02-05	14:35:09.910000	35.3578	-16.4447	411.098
2014-02-05	15:35:14.997000	35.3995	-16.4395	407.489
2014-02-05	16:35:21.503000	35.4412	-16.2868	407.989
2014-02-05	17:35:27.155000	35.483	-16.0831	405.602
2014-02-05	18:35:33.453000	35.5247	-16.1888	404.545
2014-02-05	19:35:37.628000	35.5664	-16.4964	405.166
2014-02-05	20:35:43.130000	35.6081	-16.1679	405.412
2014-02-05	21:35:48.275000	35.6499	-16.2665	407.665
2014-02-05	22:35:53.368000	35.6916	-16.1003	406.632
2014-02-05	23:35:57.934000	35.7333	-16.3577	406.93
2014-02-06	00:36:03.440000	35.775	-16.2339	405.329
2014-02-06	01:36:09.394000	35.8168	-15.6801	405.604
2014-02-06	02:36:14.852000	35.8585	-15.8508	407.453
2014-02-06	03:36:19.693000	35.9002	-16.2032	409.701
2014-02-06	04:36:24.948000	35.942	-16.2454	410.816
2014-02-06	05:36:30.174000	35.9837	-16.141	410.725
2014-02-06	06:36:36.697000	36.0254	-16.0999	409.843
2014-02-06	07:36:40.609000	36.0671	-16.1676	409.318
2014-02-06	08:36:46.785000	36.1089	-16.2009	409.483
2014-02-06	09:36:52.959000	36.1506	-15.9629	408.412
2014-02-06	10:36:58.844000	36.1923	-16.1618	409.082
2014-02-06	11:37:04.743000	36.2341	-16.3295	409.606
2014-02-06	12:37:10.092000	36.2758	-16.1455	407.306
2014-02-06	13:37:13.801000	36.3175	-16.1384	409.642
2014-02-06	14:37:19.703000	36.3593	-15.6144	409.782
2014-02-06	15:37:24.178000	36.401	-16.1896	407.685
2014-02-06	16:37:30.279000	36.4427	-15.6426	402.219
2014-02-06	17:37:36.361000	36.4844	-15.9676	401.105
2014-02-06	18:37:41.871000	36.5262	-16.0836	401.045
2014-02-06	19:37:48.282000	36.5679	-16.1177	400.225
2014-02-06	20:37:54.828000	36.6097	-16.2718	400.191
2014-02-06	21:37:59.378000	36.6514	-16.0302	402.257
2014-02-06	22:38:05.181000	36.6931	-15.8514	402.789
2014-02-06	23:38:10.512000	36.7348	-16.1638	405.522
2014-02-07	00:38:16.009000	36.7766	-16.3872	407.907
2014-02-07	01:38:21.898000	36.8183	-16.179	410.678
2014-02-07	02:38:26.351000	36.86	-16.027	411.804
2014-02-07	03:38:30.426000	36.9017	-16.0732	416.005
2014-02-07	04:38:35.016000	36.9435	-16.6912	419.482
2014-02-07	05:38:39.466000	36.9852	-16.8374	423.21
2014-02-07	06:38:44.155000	37.0269	-16.9914	425.417
2014-02-07	07:38:49.361000	37.0686	-17.0533	427.752
2014-02-07	08:38:55.059000	37.1104	-17.0945	428.095
2014-02-07	09:39:01.684000	37.1521	-16.8072	427.673
2014-02-07	10:39:06.378000	37.1938	-17.0038	426.655
2014-02-07	11:39:11.252000	37.2355	-16.8914	429.542
2014-02-07	12:39:17.088000	37.2773	-16.9242	427.994
2014-02-07	13:39:20.819000	37.319	-16.785	431.731
2014-02-07	14:39:27.341000	37.3607	-17.3536	432.215
2014-02-07	15:39:33.492000	37.4025	-16.9312	413.95
2014-02-07	16:39:37.914000	37.4442	-16.4269	411.515
2014-02-07	17:39:42.332000	37.4859	-16.6547	409.477
2014-02-07	18:39:47.286000	37.5276	-16.6031	414.541
2014-02-07	19:39:52.259000	37.5694	-17.2523	421.217
2014-02-07	20:39:55.828000	37.6111	-17.2649	423.279
2014-02-07	21:40:01.753000	37.6528	-16.9866	426.731
2014-02-07	22:40:06.937000	37.6945	-17.0213	423.058
2014-02-07	23:40:13.111000	37.7363	-16.732	427.053
2014-02-08	00:40:18.115000	37.778	-17.4882	434.422
2014-02-08	01:40:23.789000	37.8197	-16.9194	426.541
2014-02-08	02:40:28.835000	37.8614	-16.8505	428.972
2014-02-08	03:40:33.776000	37.9032	-17.0592	430.461
2014-02-08	04:40:39.019000	37.9449	-17.1455	431.09
2014-02-08	05:40:42.845000	37.9866	-17.2611	433.324
2014-02-08	06:40:47.607000	38.0283	-17.1872	432.37
2014-02-08	07:40:52.663000	38.0701	-16.9208	430.001
2014-02-08	08:40:56.986000	38.1118	-16.9708	426.842
2014-02-08	09:41:02.154000	38.1535	-16.9805	426.136
2014-02-08	10:41:08.026000	38.1952	-17.1232	427.153
2014-02-08	11:41:13.602000	38.237	-17.2169	431.2
2014-02-08	12:41:18.894000	38.2787	-17.2631	427.796
2014-02-08	13:41:23.378000	38.3204	-16.827	422.845
2014-02-08	14:41:27.148000	38.3621	-16.7185	422.013
2014-02-08	15:41:34.552000	38.4039	-16.4366	414.958
2014-02-08	16:41:39.760000	38.4456	-16.5708	417.049
2014-02-08	17:41:45.785000	38.4873	-16.4411	415.108
2014-02-08	18:41:52.694000	38.5291	-16.4287	417.756
2014-02-08	19:41:57.253000	38.5708	-16.4407	413.428
2014-02-08	20:42:03.535000	38.6125	-16.147	413.888
2014-02-08	21:42:06.934000	38.6542	-15.8625	414.743
2014-02-08	22:42:12.641000	38.696	-15.5608	414.381
2014-02-08	23:42:18.915000	38.7377	-16.37	423.04
2014-02-09	00:42:23.999000	38.7794	-16.6467	426.233
2014-02-09	01:42:28.586000	38.8212	-16.6993	432.443
2014-02-09	02:42:33.378000	38.8629	-16.7972	432.169
2014-02-09	03:42:37.776000	38.9046	-16.8335	436.12
2014-02-09	04:42:41.369000	38.9463	-17.0052	439.237
2014-02-09	05:42:47.640000	38.9881	-17.1176	439.87
2014-02-09	06:42:51.039000	39.0298	-17.0589	439.801
2014-02-09	07:42:56.891000	39.0715	-17.1723	441.261
2014-02-09	08:43:03.519000	39.1132	-17.3613	442.604
2014-02-09	09:43:08.482000	39.155	-17.3001	441.556
2014-02-09	10:43:13.561000	39.1967	-17.4072	441.199
2014-02-09	11:43:18.849000	39.2384	-17.3198	438.494
2014-02-09	12:43:24.855000	39.2801	-16.6995	427.852
2014-02-09	13:43:29.405000	39.3219	-15.8527	413.852
2014-02-09	14:43:34.701000	39.3636	-15.933	408.083
2014-02-09	15:43:40.579000	39.4053	-15.8433	408.013
2014-02-09	16:43:44.680000	39.447	-16.1377	409.479
2014-02-09	17:43:49.315000	39.4888	-15.7841	409.011
2014-02-09	18:43:53.841000	39.5305	-16.0169	408.759
2014-02-09	19:43:58.966000	39.5722	-15.9436	407.801
2014-02-09	20:44:03.759000	39.6139	-15.9076	407.994
2014-02-09	21:44:08.131000	39.6556	-15.8088	407.773
2014-02-09	22:44:11.730000	39.6974	-15.7998	408.839
2014-02-09	23:44:16.075000	39.7391	-15.773	409.115
2014-02-10	00:44:21.584000	39.7808	-15.9913	408.8
2014-02-10	01:44:25.628000	39.8225	-15.4758	407.3
2014-02-10	02:44:31.775000	39.8643	-15.7766	408.635
2014-02-10	03:44:37.348000	39.906	-16.0262	407.551
2014-02-10	04:44:43.279000	39.9477	-15.9978	412.111
2014-02-10	05:44:47.698000	39.9894	-15.9609	414.536
2014-02-10	06:44:52.969000	40.0312	-16.3422	416.486
2014-02-10	07:44:57.928000	40.0729	-16.3201	415.391
2014-02-10	08:45:04.759000	40.1146	-16.2434	415.685
2014-02-10	09:45:10.676000	40.1564	-16.2932	414.325
2014-02-10	10:45:15.825000	40.1981	-15.9287	413.621
2014-02-10	11:45:21.908000	40.2398	-16.056	413.127
2014-02-10	12:45:26.477000	40.2816	-15.2656	406.071
2014-02-10	13:45:31.884000	40.3233	-15.6558	406.945
2014-02-10	14:45:36.851000	40.365	-15.5159	407.019
2014-02-10	15:45:42.118000	40.4067	-15.4078	403.812
2014-02-10	16:45:47.151000	40.4485	-15.6135	404.751
2014-02-10	17:45:52.359000	40.4902	-15.6159	403.97
2014-02-10	18:45:56.867000	40.5319	-15.7578	404.459
2014-02-10	19:46:01.752000	40.5736	-15.4826	403.62
2014-02-10	20:46:07.996000	40.6154	-15.5569	402.861
2014-02-10	21:46:12.836000	40.6571	-15.6216	402.063
2014-02-10	22:46:18.338000	40.6988	-15.5565	404.105
2014-02-10	23:46:22.407000	40.7405	-15.6092	408.53
2014-02-11	00:46:27.233000	40.7823	-16.1108	411.773
2014-02-11	01:46:32.555000	40.824	-16.0278	419.862
2014-02-11	02:46:37.710000	40.8657	-16.0617	418.602
2014-02-11	03:46:42.872000	40.9074	-16.1834	420.485
2014-02-11	04:46:47.775000	40.9492	-16.3794	422.548
2014-02-11	05:46:51.625000	40.9909	-16.4627	422.903
2014-02-11	06:46:55.983000	41.0326	-16.5417	423.268
2014-02-11	07:47:01.404000	41.0743	-16.4693	424.731
2014-02-11	08:47:05.710000	41.116	-16.6204	423.261
2014-02-11	09:47:09.071000	41.1577	-16.5213	424.809
2014-02-11	10:47:13.059000	41.1995	-16.7276	427.085
2014-02-11	11:47:16.680000	41.2412	-16.9464	427.444
2014-02-11	12:47:22.036000	41.2829	-16.4504	418.812
2014-02-11	13:47:26.752000	41.3246	-16.4865	425.113
2014-02-11	14:47:32.125000	41.3663	-16.395	426.402
2014-02-11	15:47:36.723000	41.4081	-17.0632	428.266
2014-02-11	16:47:43.075000	41.4498	-16.7601	426.747
2014-02-11	17:47:48.371000	41.4915	-16.9621	433.337
2014-02-11	18:47:53.276000	41.5333	-16.7511	436.053
2014-02-11	19:47:59.382000	41.575	-16.5201	431.783
2014-02-11	20:48:03.473000	41.6167	-16.4789	423.499
2014-02-11	21:48:07.740000	41.6584	-16.402	421.531
2014-02-11	22:48:13.786000	41.7002	-16.2423	417.476
2014-02-11	23:48:19.078000	41.7419	-16.1502	421.135
2014-02-12	00:48:24.052000	41.7836	-16.0645	416.019
2014-02-12	01:48:29.691000	41.8253	-15.9905	419.589
2014-02-12	02:48:35.296000	41.8671	-16.3144	423.854
2014-02-12	03:48:41.411000	41.9088	-16.5497	426.843
2014-02-12	04:48:46.430000	41.9505	-16.7323	430.437
2014-02-12	05:48:51.173000	41.9923	-16.9569	438.474
2014-02-12	06:48:55.530000	42.034	-17.1053	441.45
2014-02-12	07:49:00.723000	42.0757	-17.5169	441.097
2014-02-12	08:49:05.240000	42.1174	-17.5183	441.962
2014-02-12	09:49:10.028000	42.1591	-17.5787	444.665
2014-02-12	10:49:16.180000	42.2009	-17.8257	453.153
2014-02-12	11:49:19.770000	42.2426	-18.577	462.249
2014-02-12	12:49:25.341000	42.2843	-18.6932	470.484
2014-02-12	13:49:30.115000	42.326	-19.042	483.954
2014-02-12	14:49:35.035000	42.3678	-19.3386	477.296
2014-02-12	15:49:40.709000	42.4095	-17.4631	441.273
2014-02-12	16:49:45.154000	42.4512	-16.9806	432.595
2014-02-12	17:49:50.046000	42.4929	-17.1155	439.56
2014-02-12	18:49:55.164000	42.5347	-16.6277	419.227
2014-02-12	19:50:00.421000	42.5764	-16.1262	413.028
2014-02-12	20:50:04.951000	42.6181	-16.3105	412.134
2014-02-12	21:50:08.542000	42.6598	-16.6862	419.091
2014-02-12	22:50:12.826000	42.7015	-16.6849	425.166
2014-02-12	23:50:17.203000	42.7433	-16.4822	433.657
2014-02-13	00:50:21.947000	42.785	-17.2758	449.439
2014-02-13	01:50:27.334000	42.8267	-17.9806	455.939
2014-02-13	02:50:33.842000	42.8684	-18.2532	461.513
2014-02-13	03:50:39.048000	42.9102	-18.3206	463.747
2014-02-13	04:50:44.141000	42.9519	-18.8455	473.628
2014-02-13	05:50:48.947000	42.9936	-18.5082	470.964
2014-02-13	06:50:54.168000	43.0353	-17.7599	461.639
2014-02-13	07:50:58.061000	43.0771	-17.9757	456.944
2014-02-13	08:51:02.855000	43.1188	-17.6173	452.142
2014-02-13	09:51:07.971000	43.1605	-17.4881	449.358
2014-02-13	10:51:12.267000	43.2022	-17.3655	447.007
2014-02-13	11:51:16.825000	43.2439	-17.4399	445.596
2014-02-13	12:51:23.206000	43.2857	-17.1214	438.125
2014-02-13	13:51:27.805000	43.3274	-17.4109	445.483
2014-02-13	14:51:32.703000	43.3691	-18.2727	460.91
2014-02-13	15:51:37.734000	43.4109	-16.9756	435.859
2014-02-13	16:51:44.048000	43.4526	-16.1516	414.863
2014-02-13	17:51:48.288000	43.4943	-15.9207	409.637
2014-02-13	18:51:53.648000	43.536	-16.3901	409.296
2014-02-13	19:52:00.131000	43.5778	-16.104	407.304
2014-02-13	20:52:03.855000	43.6195	-15.925	404.194
2014-02-13	21:52:09.211000	43.6612	-16.4165	414.474
2014-02-13	22:52:13.395000	43.7029	-16.1028	412.767
2014-02-13	23:52:18.598000	43.7447	-16.0625	407.853
2014-02-14	00:52:23.911000	43.7864	-16.0688	409.563
2014-02-14	01:52:29.885000	43.8281	-15.5442	404.95
2014-02-14	02:52:35.572000	43.8699	-15.7532	409.671
2014-02-14	03:52:39.778000	43.9116	-15.4929	408.894
2014-02-14	04:52:45.144000	43.9533	-15.4947	408.423
2014-02-14	05:52:50.374000	43.995	-15.8911	408.892
2014-02-14	06:52:54.845000	44.0367	-15.791	409.692
2014-02-14	07:53:00.513000	44.0785	-15.859	412.018
2014-02-14	08:53:06.934000	44.1202	-16.052	414.03
2014-02-14	09:53:12.408000	44.1619	-16.5735	418.454
2014-02-14	10:53:17.622000	44.2037	-16.5878	420.808
2014-02-14	11:53:22.963000	44.2454	-16.8736	428.899
2014-02-14	12:53:27.710000	44.2871	-17.0942	425.648
2014-02-14	13:53:32.121000	44.3288	-16.7749	427.469
2014-02-14	14:53:36.309000	44.3706	-16.8391	426.796
2014-02-14	15:53:40.119000	44.4123	-16.5549	417.624
2014-02-14	16:53:44.667000	44.454	-16.409	412.71
2014-02-14	17:53:49.440000	44.4957	-16.0463	409.677
2014-02-14	18:53:54.936000	44.5374	-16.0418	405.592
2014-02-14	19:53:59.842000	44.5792	-15.9707	406.417
2014-02-14	20:54:05.243000	44.6209	-15.5252	410.251
2014-02-14	21:54:10.572000	44.6626	-15.7379	409.931
2014-02-14	22:54:16.076000	44.7044	-15.6393	406.375
2014-02-14	23:54:21.990000	44.7461	-15.2067	405.799
2014-02-15	00:54:26.869000	44.7878	-15.1837	403.647
2014-02-15	01:54:32.375000	44.8295	-15.0614	403.172
2014-02-15	02:54:36.308000	44.8713	-15.5643	410.003
2014-02-15	03:54:41.776000	44.913	-15.6408	410.644
2014-02-15	04:54:47.869000	44.9547	-15.8104	414.667
2014-02-15	05:54:53.160000	44.9964	-15.7778	416.965
2014-02-15	06:54:58.753000	45.0382	-16.0705	417.722
2014-02-15	07:55:02.984000	45.0799	-15.6784	418.414
2014-02-15	08:55:09.398000	45.1216	-16.1329	419.229
2014-02-15	09:55:13.953000	45.1634	-15.9584	420.27
2014-02-15	10:55:19.197000	45.2051	-16.0321	423
2014-02-15	11:55:24.561000	45.2468	-16.5056	424.609
2014-02-15	12:55:29.948000	45.2885	-15.3883	412.613
2014-02-15	13:55:35.371000	45.3303	-15.5577	408.613
2014-02-15	14:55:41.164000	45.372	-15.884	410.024
2014-02-15	15:55:47.457000	45.4137	-15.9011	411.308
2014-02-15	16:55:53.417000	45.4555	-15.4954	407.124
2014-02-15	17:55:58.319000	45.4972	-15.8272	407.786
2014-02-15	18:56:03.535000	45.5389	-16.0385	418.683
2014-02-15	19:56:08.184000	45.5807	-16.4025	420.213
2014-02-15	20:56:12.901000	45.6224	-15.9042	417.894
2014-02-15	21:56:17.367000	45.6641	-16.1279	425.647
2014-02-15	22:56:23.355000	45.7058	-15.6807	413.849
2014-02-15	23:56:29.032000	45.7476	-15.5408	414.131
2014-02-16	00:56:33.503000	45.7893	-15.1564	407.374
2014-02-16	01:56:39.351000	45.831	-15.1428	410.338
2014-02-16	02:56:43.190000	45.8727	-15.6254	419.147
2014-02-16	03:56:47.759000	45.9144	-15.5913	422.272
2014-02-16	04:56:52.881000	45.9562	-15.6985	425.683
2014-02-16	05:56:57.213000	45.9979	-15.9005	426.127
2014-02-16	06:57:02.924000	46.0396	-16.0901	430.326
2014-02-16	07:57:09.364000	46.0814	-16.365	428.974
2014-02-16	08:57:15.035000	46.1231	-16.0056	423.449
2014-02-16	09:57:20.019000	46.1648	-15.8042	419.988
2014-02-16	10:57:26.688000	46.2066	-15.6347	419.573
2014-02-16	11:57:33.542000	46.2483	-15.6644	417.28
2014-02-16	12:57:39.993000	46.29	-14.6759	399.129
2014-02-16	13:57:46.036000	46.3318	-14.8063	396.804
2014-02-16	14:57:51.194000	46.3735	-14.8899	406.56
2014-02-16	15:57:56.924000	46.4152	-14.8295	404.069
2014-02-16	16:58:02.821000	46.457	-14.9895	406.048
2014-02-16	17:58:09.871000	46.4987	-14.6251	413.844
2014-02-16	18:58:14.197000	46.5404	-14.6123	401.878
2014-02-16	19:58:19.684000	46.5822	-14.5984	402.227
2014-02-16	20:58:23.933000	46.6239	-14.7459	404.046
2014-02-16	21:58:29.969000	46.6656	-14.437	403.495
2014-02-16	22:58:35.122000	46.7074	-14.7933	407.78
2014-02-16	23:58:40.177000	46.7491	-14.8287	405.487
2014-02-17	00:58:44.019000	46.7908	-15.1912	409.247
2014-02-17	01:58:48.753000	46.8325	-15.4911	406.595
2014-02-17	02:58:54.650000	46.8742	-15.7601	413.402
2014-02-17	03:59:00.032000	46.916	-15.8195	414.022
2014-02-17	04:59:04.855000	46.9577	-15.9851	419.944
2014-02-17	05:59:10.180000	46.9994	-16.3415	423.744
2014-02-17	06:59:14.069000	47.0411	-16.4081	426.363
2014-02-17	07:59:17.789000	47.0828	-16.6062	426.811
2014-02-17	08:59:22.960000	47.1246	-16.4269	428.387
2014-02-17	09:59:27.115000	47.1663	-16.4576	429.105
2014-02-17	10:59:32.500000	47.208	-16.0859	427.019
2014-02-17	11:59:37.374000	47.2497	-16.267	426.475
2014-02-17	12:59:41.772000	47.2915	-15.6668	411.723
2014-02-17	13:59:48.421000	47.3332	-16.095	410.327
2014-02-17	14:59:52.849000	47.3749	-15.4472	406.495
2014-02-17	15:59:57.519000	47.4166	-15.843	418.21
2014-02-17	17:00:02.063000	47.4584	-16.2199	423.944
2014-02-17	18:00:08.371000	47.5001	-16.1452	430.349
2014-02-17	19:00:13.711000	47.5418	-15.8511	418.987
2014-02-17	20:00:18.325000	47.5835	-15.2544	405.53
2014-02-17	21:00:24.753000	47.6253	-14.8284	403.698
2014-02-17	22:00:30.601000	47.667	-14.6649	401.155
2014-02-17	23:00:36.743000	47.7088	-14.7482	401.296
2014-02-18	00:00:41.680000	47.7505	-14.6735	402.081
2014-02-18	01:00:46.961000	47.7922	-15.0854	400.453
2014-02-18	02:00:53.736000	47.834	-14.8451	400.772
2014-02-18	03:00:59.545000	47.8757	-14.7185	405.209
2014-02-18	04:01:04.515000	47.9174	-14.6652	405.332
2014-02-18	05:01:09.437000	47.9591	-15.567	415.266
2014-02-18	06:01:14.838000	48.0009	-14.8611	407.026
2014-02-18	07:01:20.290000	48.0426	-14.9391	406.823
2014-02-18	08:01:25.288000	48.0843	-15.106	410.583
2014-02-18	09:01:30.543000	48.126	-15.6317	418.752
2014-02-18	10:01:36.023000	48.1678	-15.8061	420.684
2014-02-18	11:01:42.907000	48.2095	-15.7682	417.783
2014-02-18	12:01:46.782000	48.2512	-15.505	418.432
2014-02-18	13:01:51.249000	48.293	-15.4411	414.422
2014-02-18	14:01:55.496000	48.3347	-15.7157	420.639
2014-02-18	15:02:00.551000	48.3764	-16.4899	432.908
2014-02-18	16:02:06.576000	48.4181	-15.0384	406.853
2014-02-18	17:02:11.881000	48.4599	-14.7534	400.889
2014-02-18	18:02:17.220000	48.5016	-14.8325	399.721
2014-02-18	19:02:23.983000	48.5433	-14.8988	399.456
2014-02-18	20:02:29.778000	48.5851	-15.1123	400.518
2014-02-18	21:02:33.487000	48.6268	-15.2285	402.098
2014-02-18	22:02:37.548000	48.6685	-15.076	401.079
2014-02-18	23:02:42.713000	48.7102	-14.9266	403.767
2014-02-19	00:02:47.301000	48.7519	-15.8217	410.585
2014-02-19	01:02:53.624000	48.7937	-15.2846	410.406
2014-02-19	02:02:57.753000	48.8354	-15.8037	415.09
2014-02-19	03:03:01.966000	48.8771	-15.7049	415.667
2014-02-19	04:03:07.782000	48.9188	-16.3439	426.705
2014-02-19	05:03:13.480000	48.9606	-15.633	417.593
2014-02-19	06:03:19.411000	49.0023	-14.973	410.032
2014-02-19	07:03:24.571000	49.044	-15.0198	404.804
2014-02-19	08:03:29.743000	49.0858	-15.137	407.314
2014-02-19	09:03:34.405000	49.1275	-15.216	411.826
2014-02-19	10:03:39.970000	49.1692	-15.4286	411.583
2014-02-19	11:03:45.473000	49.2109	-15.3814	411.895
2014-02-19	12:03:50.645000	49.2527	-15.5116	413.355
2014-02-19	13:03:56.339000	49.2944	-14.9286	401.502
2014-02-19	14:04:00.125000	49.3361	-14.7533	402.171
2014-02-19	15:04:05.118000	49.3778	-14.6562	400.673
2014-02-19	16:04:09.670000	49.4196	-14.5161	401.949
2014-02-19	17:04:14.808000	49.4613	-14.6785	401.515
2014-02-19	18:04:19.296000	49.503	-14.7795	400.49
2014-02-19	19:04:24.306000	49.5447	-14.7501	401.975
2014-02-19	20:04:28.579000	49.5864	-14.8573	402.29
2014-02-19	21:04:32.568000	49.6282	-14.8301	407.537
2014-02-19	22:04:38.206000	49.6699	-14.8029	405.284
2014-02-19	23:04:43.753000	49.7116	-14.6485	404.941
2014-02-20	00:04:49.734000	49.7534	-15.1408	415.664
2014-02-20	01:04:55.244000	49.7951	-15.617	418.276
2014-02-20	02:05:00.673000	49.8368	-15.1816	411.973
2014-02-20	03:05:05.542000	49.8785	-14.9255	409.211
2014-02-20	04:05:10.624000	49.9203	-15.2804	409.152
2014-02-20	05:05:14.023000	49.962	-15.0991	409.183
2014-02-20	06:05:20.285000	50.0037	-14.9971	409.342
2014-02-20	07:05:26.729000	50.0454	-15.3408	409.825
2014-02-20	08:05:32.525000	50.0872	-15.879	411.956
2014-02-20	09:05:36.844000	50.1289	-15.7733	409.948
2014-02-20	10:05:40.971000	50.1706	-15.5993	412.941
2014-02-20	11:05:46.921000	50.2123	-15.9755	416.17
2014-02-20	12:05:52.839000	50.2541	-15.9649	416.845
2014-02-20	13:05:57.831000	50.2958	-15.6908	403.597
2014-02-20	14:06:03.263000	50.3375	-16.5489	417.951
2014-02-20	15:06:08.584000	50.3793	-15.9708	412.286
2014-02-20	16:06:13.322000	50.421	-15.388	401.557
2014-02-20	17:06:19.302000	50.4627	-15.2594	395.264
2014-02-20	18:06:23.612000	50.5044	-15.4182	396.14
2014-02-20	19:06:28.174000	50.5462	-15.2891	396.317
2014-02-20	20:06:33.543000	50.5879	-15.1689	393.782
2014-02-20	21:06:38.101000	50.6296	-15.3711	394.692
2014-02-20	22:06:44.013000	50.6713	-15.1544	402.294
2014-02-20	23:06:48.954000	50.7131	-15.1442	401.347
2014-02-21	00:06:54.694000	50.7548	-14.6085	396.658
2014-02-21	01:07:00.851000	50.7965	-14.6569	395.5
2014-02-21	02:07:06.888000	50.8383	-14.6686	397.309
2014-02-21	03:07:12.924000	50.88	-15.045	403.723
2014-02-21	04:07:17.957000	50.9217	-15.0051	408.047
2014-02-21	05:07:23.121000	50.9635	-15.1903	406.564
2014-02-21	06:07:27.240000	51.0052	-15.0394	405.688
2014-02-21	07:07:32.542000	51.0469	-15.1704	408.572
2014-02-21	08:07:38.066000	51.0886	-14.9803	405.406
2014-02-21	09:07:43.203000	51.1304	-14.4347	404.414
2014-02-21	10:07:49.358000	51.1721	-14.9316	406.041
2014-02-21	11:07:54.543000	51.2138	-15.0842	408.815
2014-02-21	12:07:59.246000	51.2555	-15.2831	410.838
2014-02-21	13:08:04.716000	51.2973	-14.1035	392.801
2014-02-21	14:08:09.634000	51.339	-14.1934	396.617
2014-02-21	15:08:14.989000	51.3807	-14.313	394.716
2014-02-21	16:08:19.984000	51.4225	-14.4409	396.01
2014-02-21	17:08:25.009000	51.4642	-14.141	393.662
2014-02-21	18:08:30.688000	51.5059	-14.358	395.933
2014-02-21	19:08:37.247000	51.5477	-14.5391	400.165
2014-02-21	20:08:43.522000	51.5894	-14.787	398.193
2014-02-21	21:08:48.562000	51.6311	-14.6398	399.707
2014-02-21	22:08:54.408000	51.6729	-14.8693	398.564
2014-02-21	23:09:00.125000	51.7146	-15.0003	404.293
2014-02-22	00:09:04.421000	51.7563	-15.4455	407.731
2014-02-22	01:09:09.743000	51.798	-15.0328	403.563
2014-02-22	02:09:15.927000	51.8398	-14.9651	405.719
2014-02-22	03:09:21.164000	51.8815	-14.9352	411.33
2014-02-22	04:09:25.555000	51.9232	-14.8318	407.427
2014-02-22	05:09:30.924000	51.9649	-15.2107	411.741
2014-02-22	06:09:35.460000	52.0067	-15.475	414.917
2014-02-22	07:09:41.575000	52.0484	-15.458	417.782
2014-02-22	08:09:47.520000	52.0901	-15.7333	420.871
2014-02-22	09:09:54.561000	52.1319	-15.6852	419.759
2014-02-22	10:09:59.779000	52.1736	-15.9978	424.957
2014-02-22	11:10:05.667000	52.2153	-15.9823	422.764
2014-02-22	12:10:09.375000	52.2571	-15.8874	420.485
2014-02-22	13:10:15.042000	52.2988	-15.3327	409.2
2014-02-22	14:10:19.405000	52.3405	-14.9669	410.535
2014-02-22	15:10:23.647000	52.3822	-15.2551	411.435
2014-02-22	16:10:27.726000	52.4239	-14.7827	406.835
2014-02-22	17:10:33.539000	52.4657	-14.6733	402.651
2014-02-22	18:10:37.394000	52.5074	-14.9107	410.152
2014-02-22	19:10:42.888000	52.5491	-14.6236	399.659
2014-02-22	20:10:48.190000	52.5908	-15.1233	405.455
2014-02-22	21:10:53.795000	52.6326	-15.1179	412.187
2014-02-22	22:10:58.757000	52.6743	-15.4259	412.777
2014-02-22	23:11:04.019000	52.716	-15.0279	406.269
2014-02-23	00:11:09.721000	52.7578	-14.9826	409.803
2014-02-23	01:11:13.816000	52.7995	-14.5118	399.6
2014-02-23	02:11:17.957000	52.8412	-15.0595	415.425
2014-02-23	03:11:22.028000	52.8829	-15.7231	415.175
2014-02-23	04:11:25.809000	52.9246	-16.0444	419.694
2014-02-23	05:11:31.500000	52.9663	-16.3712	414.615
2014-02-23	06:11:35.911000	53.0081	-16.2153	418.923
2014-02-23	07:11:40.290000	53.0498	-16.2327	419.176
2014-02-23	08:11:44.305000	53.0915	-15.795	415.751
2014-02-23	09:11:49.293000	53.1332	-16.2492	417.51
2014-02-23	10:11:54.523000	53.1749	-16.024	417.837
2014-02-23	11:11:59.562000	53.2167	-16.0349	418.968
2014-02-23	12:12:04.022000	53.2584	-15.9861	417.081
2014-02-23	13:12:09.928000	53.3001	-15.3267	397.055
2014-02-23	14:12:16.128000	53.3419	-14.6815	394.825
2014-02-23	15:12:23.489000	53.3836	-14.8222	402.086
2014-02-23	16:12:28.513000	53.4253	-15.0591	405.652
2014-02-23	17:12:33.703000	53.4671	-15.0827	402.53
2014-02-23	18:12:39.394000	53.5088	-15.1296	403.721
2014-02-23	19:12:44.459000	53.5505	-14.4789	409.876
2014-02-23	20:12:48.908000	53.5922	-15.2298	403.928
2014-02-23	21:12:55.315000	53.634	-14.884	402.811
2014-02-23	22:13:00.996000	53.6757	-15.2187	406.354
2014-02-23	23:13:06.066000	53.7174	-15.1499	411.25
2014-02-24	00:13:11.655000	53.7592	-15.1524	406.016
2014-02-24	01:13:15.285000	53.8009	-16.2455	413.713
2014-02-24	02:13:20.490000	53.8426	-15.9691	408.724
2014-02-24	03:13:26.536000	53.8843	-16.0484	414.725
2014-02-24	04:13:31.711000	53.9261	-16.0238	416.016
2014-02-24	05:13:37.792000	53.9678	-16.2619	420.957
2014-02-24	06:13:43.418000	54.0095	-16.5016	423.84
2014-02-24	07:13:48.539000	54.0513	-16.4406	425.117
2014-02-24	08:13:52.888000	54.093	-16.4064	427.177
2014-02-24	09:13:58.391000	54.1347	-16.4881	428.503
2014-02-24	10:14:03.989000	54.1764	-16.9378	431.461
2014-02-24	11:14:08.430000	54.2182	-16.6516	431.302
2014-02-24	12:14:12.002000	54.2599	-16.251	421.593
2014-02-24	13:14:17.118000	54.3016	-15.0772	397.332
2014-02-24	14:14:22.418000	54.3433	-14.4502	396.175
2014-02-24	15:14:26.177000	54.385	-14.7617	403.412
2014-02-24	16:14:29.786000	54.4267	-15.0487	400.464
2014-02-24	17:14:34.494000	54.4685	-14.668	398.057
2014-02-24	18:14:39.887000	54.5102	-14.7209	400.484
2014-02-24	19:14:44.085000	54.5519	-15.2263	408.939
