# Supplementary material
Source: Frontiers journal article supplement (https://www.frontiersin.org/articles/260772)
Supplement: Data_Sheet_4.XLSX [file Data_Sheet_4.XLSX]

## Sheet: data
Plot	il	pct_iso-alkanes	pct_anteiso-alkanes	Methyl_Index	n-alkane_CPI	n-alkane_ACL	anteiso_CPI	anteiso_ACL	iso_CPI	iso_ACL	eps13C_i.C31	eps13C_n.C31	eps13C_i.C33	eps13C_n.C33	n31-i31	n33-i33
B	cvM82	7.27	6.83	0.14	12.4	31.3	0.26	32.1	10.8	31.8	-14.5	-16	-14.2	-15.5	-1.4	-1.2
B	IL_1.1	6.13	4.94	0.11	15	31.4	0.27	32	13.4	31.8	-20	-22.6	-20.8	-22.3	-2.6	-1.5
B	IL_1.1.2	10.51	11.29	0.22	12	31.2	0.17	32	16.8	31.7	-18.4	-20	-18.5	-19.3	-1.6	-0.8
B	IL_1.2	6.05	6.58	0.13	14.6	31.3	0.24	32	11	31.7	-17.1	-18.8	-17	-18.4	-1.7	-1.4
B	IL_1.3	11.13	6.12	0.17	14.1	31.3	0.31	32.1	13.7	31.7	-18.8	-20.1	-18.6	-19.5	-1.2	-0.8
B	IL_1.4	8.76	8.63	0.17	10.6	31.4	0.21	32.1	13.3	31.9	-19.6	-21.3	-20.1	-21	-1.7	-0.9
B	IL_1.4.18	7.58	5.61	0.13	12.6	31.5	0.23	32.2	13.3	32	-18	-19.7	-17.9	-18.9	-1.6	-1
B	IL_10.1	5.21	6.27	0.11	13	31.4	0.24	32.1	9.1	31.9	-16	-17.5	-15.8	-17.2	-1.5	-1.3
B	IL_10.1.1	5.12	4.9	0.1	13.6	31.4	0.27	32.1	10.3	31.9	-18.9	-20.3	-19.1	-19.6	-1.4	-0.5
B	IL_10.2	5.88	8.68	0.15	17.4	31.4	0.16	32.1	15.7	31.8	-16	-17	-16.1	-16.7	-1	-0.5
B	IL_10.2.2	9.28	9.06	0.18	13.2	31.3	0.21	32.1	16.1	31.8	-19.6	-20.9	-20.8	-21.6	-1.2	-0.8
B	IL_10.3	7.14	9.27	0.16	12.3	31.4	0.21	32.1	11.1	31.9	NA	NA	NA	NA	NA	NA
B	IL_11.1	4.74	5.94	0.11	13.3	31.5	0.21	32.2	11.4	32.1	-17.2	-19.1	-17	-18.7	-1.8	-1.6
B	IL_11.3	3.72	3.84	0.08	13.9	31.4	0.26	32.1	10.7	32	NA	NA	NA	NA	NA	NA
B	IL_11.4	5.78	2.92	0.09	13.3	31.5	0.19	32.3	13.1	31.9	-19.8	-21.7	-19.6	-21.2	-1.9	-1.5
B	IL_11.4.1	5.28	6.35	0.12	13	31.3	0.23	32.1	10.5	31.8	-14.9	-16.3	-14.5	-16	-1.4	-1.4
B	IL_12.1	5.97	7.75	0.14	12.6	31.2	0.2	32.1	11.4	31.7	-18.5	-20.5	-18.7	-19.6	-1.9	-0.9
B	IL_12.1.1	6.28	5.1	0.11	13.5	31.3	0.25	32.1	13.6	31.8	-17.1	-19.1	-16.6	-18.5	-1.9	-1.9
B	IL_12.2	5.41	6.19	0.12	12.8	31.3	0.23	32.1	9.8	31.8	-16.1	-18.7	-15.9	-18.1	-2.5	-2.1
B	IL_12.3	5.14	8.88	0.14	13.5	31.4	0.17	32.1	9.9	31.9	-18.2	-20.9	-18.5	-20.2	-2.6	-1.7
B	IL_12.3.1	5.43	4.11	0.1	13	31.5	0.35	32.1	11.6	31.9	-21.6	-23.3	-21.3	-22.8	-1.7	-1.4
B	IL_12.4	6.22	5.98	0.12	13.8	31.3	0.24	32.1	11	31.8	-14.6	-16.1	-14	-15.6	-1.4	-1.7
B	IL_12.4.1	6.82	5.22	0.12	12.6	31.4	0.31	32.1	12.3	31.9	-17.8	-19.6	-17.8	-19.2	-1.8	-1.3
B	IL_2.1	7.33	5.3	0.13	12.5	31.3	0.29	32.1	12.7	31.8	NA	NA	NA	NA	NA	NA
B	IL_2.1.1	6.54	6.73	0.13	12.9	31.4	0.1	32	15.6	31.8	NA	NA	NA	NA	NA	NA
B	IL_2.3	6.04	5.88	0.12	12.5	31.3	0.23	32.1	14.6	31.9	-17.1	-18.3	-16.5	-17.8	-1.2	-1.2
B	IL_2.4	5.63	4.42	0.1	14	31.4	0.33	32.1	13.6	31.9	-19.6	-21.6	-19.6	-21.3	-2.1	-1.6
B	IL_2.5	5.18	3.6	0.09	12.8	31.8	0.32	32.3	13	32.3	-20.3	-23.9	-20.3	-23.7	-3.5	-3.3
B	IL_2.6	7.69	7.15	0.15	12.3	31.3	0.04	32.1	14	31.8	-17	-19	-16.8	-18.5	-1.9	-1.6
B	IL_2.6.5	8.94	9.29	0.18	11.6	31.3	0.23	32.1	12.4	31.8	-20.9	-23.1	-21.1	-22.6	-2.2	-1.5
B	IL_3.1	7.85	8.5	0.16	12.6	31.3	0.25	32.1	11.2	31.7	-16.4	-17.4	-15.9	-17	-1	-1
B	IL_3.2	13.09	12.61	0.26	11.9	31.3	0.23	32.1	16.1	31.8	-19.7	-21.5	-19.7	-20.5	-1.8	-0.7
B	IL_3.3	6.9	9.32	0.16	11.8	31.3	0.2	32.1	10.7	31.8	-16.9	-18.5	-16.5	-18	-1.6	-1.5
B	IL_3.4	6.36	7.93	0.14	10.6	31.5	0.1	32.1	12.4	32	-16.4	-18.3	-16.2	-18.2	-1.9	-1.9
B	IL_3.5	8.16	6.23	0.14	12.8	31.3	0.25	32.1	14.5	31.8	-19.9	-22	-19.8	-21.5	-2.1	-1.7
B	IL_4.1	7.58	4.41	0.12	12.5	31.4	0.44	32.1	13.5	31.9	-19.1	-21	-18.2	-20.4	-1.8	-2.2
B	IL_4.1.1	5.94	8.52	0.14	13.7	31.1	0.17	32	14.8	31.6	-19.2	-20.3	-18.6	-19.5	-1	-0.9
B	IL_4.2	4.49	5.14	0.1	13.5	31.3	0.05	32.1	13.9	31.8	-19.1	-21	-18.6	-20.7	-2	-2
B	IL_4.3	4.82	10.35	0.15	13.1	31.3	0.13	32	9.1	31.8	NA	NA	NA	NA	NA	NA
B	IL_4.3.2	6.29	7.71	0.14	12.3	31.3	0.12	32.1	10.8	31.9	-18.3	-19.9	-18	-19.7	-1.5	-1.7
B	IL_4.4	5.07	6.53	0.12	14.3	31.4	0.21	32.1	11.1	31.9	-16.3	-17.8	-16.4	-17.1	-1.4	-0.6
B	IL_5.1	7.04	9.35	0.16	12.5	31.4	0.19	32.1	10.1	31.9	-16.9	-18.4	-16.8	-17.9	-1.4	-1.1
B	IL_5.2	6.63	7.88	0.15	12.9	31.4	0.13	32.2	9	31.9	-15.7	-16.8	-15.3	-16.2	-1	-0.9
B	IL_5.4	6.3	5.44	0.12	12.4	31.3	0.25	32.1	9.3	31.8	-16.6	-18.1	-16.3	-17.7	-1.4	-1.3
B	IL_5.5	9.37	6.92	0.16	12.9	31.3	0.3	32	13.7	31.8	-19.4	-21.3	-18.8	-20.4	-1.9	-1.5
B	IL_6.1	7.23	4.84	0.12	13	31.5	0.18	32.2	10.8	32	-18.8	-21.3	-19	-21	-2.4	-2.1
B	IL_6.2	7.78	10.07	0.18	11.2	31.4	0.17	32.1	17	31.9	-18.7	-21.3	-18.5	-20.6	-2.5	-2.1
B	IL_6.2.2	6.31	9	0.15	11.6	31.4	0.16	32.1	13.6	31.9	-18.4	-20.8	-18.5	-20.2	-2.3	-1.7
B	IL_6.3	7.41	7.46	0.15	12.7	31.4	0.23	32.1	12.6	31.8	-19	-20.4	-18.7	-19.8	-1.5	-1.1
B	IL_6.4	7.5	12.64	0.2	11.8	31.2	0.17	32	12.1	31.6	-17.2	-18.5	-16.9	-17.9	-1.3	-0.9
B	IL_7.2	8.23	6.35	0.15	11.4	31.4	0.15	32.1	13.3	31.8	-16.9	-18.6	-16.2	-17.9	-1.7	-1.7
B	IL_7.3	4.98	4.02	0.09	12.6	31.4	0.32	32.2	10.2	32	-17.7	-20.2	-17.6	-19.6	-2.5	-1.8
B	IL_7.4	8.46	12.24	0.21	13.3	31.4	0.1	32.1	18.2	31.7	-18.3	-19.1	-18.3	-18.6	-0.7	-0.3
B	IL_7.4.1	5.86	8.91	0.15	12.6	31.3	0.23	32	9.9	31.8	-18	-19.5	-18	-19.2	-1.5	-1.1
B	IL_7.5	6.91	5.43	0.12	14.3	31.4	0.28	32.1	14.2	31.9	-17.3	-19.4	-18	-18.4	-2.1	-0.4
B	IL_7.5.5	5.43	3.88	0.09	13.9	31.4	0.33	32.2	12.1	32.1	NA	NA	NA	NA	NA	NA
B	IL_8.1	5.29	5.19	0.1	13.2	31.3	0.26	32.1	12.4	31.9	-16.8	-19.1	-16.6	-18.7	-2.2	-2
B	IL_8.1.1	7.67	8.92	0.17	11.9	31.3	0.2	32.1	12.7	31.8	-17.9	-20.2	-17.6	-19.8	-2.3	-2.1
B	IL_8.1.3	7.06	6.82	0.14	12.3	31.4	0.07	32	7.3	31.9	-19	-21	-18.2	-20	-2.1	-1.8
B	IL_8.2.1	6.94	6.02	0.13	11.4	31	0.3	32.1	9	31.7	-16.9	-18.5	-16.5	-17.8	-1.6	-1.2
B	IL_8.3	5.48	5.28	0.11	14.2	31.3	0.25	32.1	12.6	31.8	-15.6	-16.8	-15.3	-16.5	-1.1	-1.1
B	IL_8.3.1	6	5.02	0.11	13.7	31.3	0.31	32.1	12.3	31.9	-19.9	-22.1	-20.5	-22.2	-2.2	-1.6
B	IL_9.1	6.5	6.2	0.13	13	31.4	0.28	32.1	9.5	31.9	-18	-19.3	-17.3	-18.6	-1.3	-1.3
B	IL_9.1.2	6.17	4.79	0.11	12.6	31.4	0.32	32.1	10.3	31.9	-16.5	-18.6	-16.2	-18	-2	-1.8
B	IL_9.1.3	10.71	5.25	0.16	12.4	31.4	0	32	10.1	31.9	-20.2	-22.4	-20.2	-21.9	-2.2	-1.6
B	IL_9.2	4.95	3.09	0.08	13.2	31.5	0.35	32.2	11.9	32	-18.8	-20.9	-18.9	-20.5	-2	-1.5
B	IL_9.2.5	4.51	3.6	0.08	13.7	31.4	0.29	32.1	11.7	32	-20.3	-21.6	-20.7	-21.1	-1.4	-0.3
B	IL_9.2.6	6.67	9.22	0.16	12.1	31.4	0.14	32.1	10.2	31.9	NA	NA	NA	NA	NA	NA
B	IL_9.3	5.82	5.32	0.11	12.7	31.3	0.26	32.1	12.5	31.9	-20	-21.6	-20.7	-21.3	-1.6	-0.6
B	IL_9.3.1	5.58	5.59	0.11	13	31.2	0.26	32.1	11.2	31.7	-19.2	-21.5	-18.9	-21.1	-2.2	-2.3
B	IL_9.3.2	6.54	10.62	0.17	13.8	31.4	0.15	32.1	12.8	31.9	-17.3	-18.3	-17	-18	-1	-0.9
C	cvM82	5.89	6.33	0.12	12.1	31.4	0.27	32.2	7.7	31.9	-16.4322	-18	-16.4	-17.6	-1.5	-1.2
C	IL_1.1	5.6	5.8	0.11	12.6	31.3	0.12	32.1	9.9	31.7	-18.3693	-19.8	-15.7	-18.8	-1.4	-3
C	IL_1.1.2	8.94	9.58	0.19	11.4	31.3	0.21	32.1	13.4	31.8	-18.5442	-20.2	-16.9	-19.6	-1.6	-2.7
C	IL_1.1.3	10.78	10.48	0.21	10.1	31.3	0.15	32	9.5	31.7	-18.2422	-20.1	-17.5	-19.5	-1.8	-2
C	IL_1.2	5.08	5.08	0.1	15.2	31.4	0.31	32.1	8.3	31.7	-16.0262	-17.8	-15.7	-17.4	-1.7	-1.8
C	IL_1.4	7.38	6.81	0.14	11.6	31.5	0.19	32.1	8.2	31.9	-16.9427	-18.6	-17.1	-18.1	-1.6	-0.9
C	IL_1.4.18	8.8	7.02	0.16	11.9	31.3	0.11	32.1	21.2	31.8	-19.8295	-21.1	-19.5	-20.5	-1.2	-0.9
C	IL_10.1	5.49	6.62	0.12	12.3	31.4	0.24	32.1	7.6	31.9	-14.6387	-16	-15.4	-15.8	-1.3	-0.3
C	IL_10.1.1	6.43	8.32	0.15	12.8	31.3	0.12	32.1	11.3	31.8	-17.572	-19.2	-17.3	-18.8	-1.6	-1.5
C	IL_10.2	6.7	7.86	0.15	14.9	31.4	0.2	32.1	10.2	31.8	-17.1295	-18.3	-17.3	-18	-1.2	-0.6
C	IL_10.2.2	5.99	7.76	0.14	15.7	31.4	0.19	32.1	12	31.7	-17.9487	-18.4	-18.1	-18.3	-0.4	-0.2
C	IL_10.3	8.44	10.54	0.19	11.1	31.4	0.23	32.1	9.1	31.8	-17.5027	-18.4	-17.6	-18.2	-0.9	-0.6
C	IL_11.1	5.74	6.77	0.13	13.3	31.4	0.22	32.1	9.6	31.9	-16.7519	-18.3	-16.5	-18	-1.5	-1.4
C	IL_11.2	9.56	10.04	0.2	10.5	31.4	0.24	32.1	10.2	31.7	-17.4196	-19.3	-16.7	-19.1	-1.9	-2.2
C	IL_11.3	5.53	5.96	0.11	10.6	31.5	0.17	32.1	11.5	31.9	NA	NA	NA	NA	NA	NA
C	IL_11.4	6.33	5.75	0.12	12.6	31.4	0.28	32.1	10	31.8	-16.3456	-17.9	-16.4	-17.7	-1.5	-1.3
C	IL_11.4.1	6.55	6.93	0.13	11.8	31.3	0.27	32.1	8.7	31.8	-16.4238	-18.1	-16.5	-17.7	-1.6	-1.2
C	IL_12.1	6.39	7.68	0.14	12.5	31.3	0.24	32.1	9.1	31.7	-15.8858	-17.2	-15.4	-16.8	-1.3	-1.4
C	IL_12.1.1	5.05	5.45	0.11	13.9	31.4	0.26	32.1	8.6	31.9	-15.1271	-16.4	-14.5	-16	-1.3	-1.4
C	IL_12.2	5.14	4.86	0.1	12.1	31.4	0.19	32.1	8.4	31.9	-16.5558	-19.1	-17.2	-18.6	-2.5	-1.4
C	IL_12.3	4.98	10.61	0.16	13.6	31.4	0.16	32.1	10.6	31.8	-17.9135	-19.6	-17.5	-19	-1.7	-1.4
C	IL_12.3.1	5.9	7.61	0.14	11.9	31.4	0.22	32.1	9.1	31.8	-16.5507	-18.2	-16.2	-17.9	-1.6	-1.6
C	IL_12.4	5.66	6.57	0.12	13.4	31.4	0.23	32.1	10.1	31.8	-15.6911	-17.5	-15.5	-17.3	-1.8	-1.8
C	IL_12.4.1	6.93	7.02	0.14	11.3	31.5	0.27	32.1	8.8	31.9	-18.9078	-20.7	-18.8	-20.1	-1.8	-1.2
C	IL_2.1	7.58	5.53	0.13	12.2	31.3	0.21	32.1	11.7	31.8	-20.7816	-22.3	-21.3	-22.2	-1.6	-0.8
C	IL_2.1.1	4.74	6.27	0.11	14	31.4	0.09	32.2	8.5	31.9	-17.7735	-19.2	-17.8	-18.9	-1.4	-1.1
C	IL_2.3	7.25	7.03	0.14	13.1	31.5	0.19	32.1	9.9	31.8	-16.5418	-17.5	-15.9	-16.5	-0.9	-0.6
C	IL_2.4	7.61	5.81	0.13	10.6	31.5	0.26	32.1	7.6	31.8	-16.9148	-21	-16.1	-19.2	-4	-3.1
C	IL_2.5	7.81	13.91	0.22	11	31.5	0.05	32.1	9.2	31.8	-12.8778	-14.3	-13.2	-13.8	-1.4	-0.5
C	IL_2.6	7.91	9.43	0.17	11.2	31.3	0.12	32.1	17.1	31.8	-17.2736	-18.8	-17	-18.2	-1.5	-1.2
C	IL_2.6.5	5.3	9.93	0.15	12.5	31.4	0.11	32.1	9.1	31.7	-15.0615	-16	-15.4	-15.7	-1	-0.3
C	IL_3.1	9.84	11.59	0.21	12.9	31.3	0.21	32	14.3	31.7	-19.751	-21.6	-20.3	-20.6	-1.8	-0.4
C	IL_3.2	9.71	14.35	0.24	11.6	31.4	0.16	32.1	12.4	31.8	-17.7817	-18.3	-17.4	-18	-0.5	-0.6
C	IL_3.3	6.59	9.6	0.16	11.1	31.3	0.08	32.1	11.7	31.9	-17.5631	-19.3	-17.7	-18.8	-1.7	-1.1
C	IL_3.4	7.51	8.36	0.16	9.8	31.3	0.05	32.1	14.7	31.7	-17.0151	-19	NA	-18.9	-2	NA
C	IL_3.5	6.52	5.23	0.12	12.7	31.5	0.18	32.1	8.2	31.9	-18.549	-20.3	-18.4	-19.9	-1.7	-1.5
C	IL_4.1	6.08	4.38	0.1	13.7	31.4	0.15	32	9.2	31.8	-16.5397	-18.6	-16.4	-18.2	-1.9	-1.8
C	IL_4.2	5.12	8.03	0.13	13.4	31.2	0.18	32	12.6	31.6	-17.2984	-18.9	-16.9	-18.5	-1.5	-1.5
C	IL_4.3	4.8	9.83	0.15	12.2	31.4	0.15	32.1	7	31.8	-19.0301	-19.3	-17.5	-18.6	-0.3	-1.1
C	IL_4.3.2	6.34	10.8	0.17	14.2	31	0	32	5.8	31.1	-17.0884	-17.3	NA	-16.9	-0.3	NA
C	IL_4.4	5.94	8.26	0.14	13	31.4	0.21	32.1	7.6	31.7	-15.7084	-16.7	-15.6	-16.1	-1	-0.5
C	IL_5.1	5.39	6.04	0.11	13.8	31.4	0.24	32.1	7.9	31.8	-15.5961	-17	-15.3	-16.6	-1.4	-1.3
C	IL_5.2	7.16	10.99	0.18	9.6	31.5	0.13	32.1	14.9	31.8	-19.7401	-20.9	-19.2	-20.2	-1.2	-1
C	IL_5.4	6.96	7.04	0.14	11	31.3	0.14	32.1	14.4	31.7	-18.0534	-19.3	-17.8	-18.7	-1.2	-0.8
C	IL_6.1	6.91	6.04	0.13	12.8	31.5	0.28	32.2	10.2	31.9	-18.0938	-20.5	-18.3	-20	-2.4	-1.7
C	IL_6.2	6.12	9.76	0.16	10.2	31.5	0.14	32.2	8.5	31.9	-19.2786	-20.3	-16.9	-19.4	-1	-2.5
C	IL_6.2.2	6.18	7.4	0.14	14.5	31.2	0.1	31.9	16.9	31.5	-16.2078	-17.7	-16.3	-17.3	-1.5	-0.9
C	IL_6.3	5.59	10.93	0.17	12.4	31.4	0.16	32.1	7	31.8	-17.5109	-18.8	-16.3	-17.5	-1.3	-1.1
C	IL_6.4	8.23	7.62	0.16	11	31.4	0.25	32.1	10.1	31.8	-20.1288	-21.1	-18.8	-20.6	-1	-1.7
C	IL_7.2	6.19	4.93	0.11	13.6	31.3	0.35	32.1	9.8	31.8	-16.421	-18.2	-16.1	-17.9	-1.7	-1.8
C	IL_7.3	6.31	6.15	0.12	12.4	31.4	0.31	32.1	10.1	31.9	-17.1395	-18.8	-16.9	-18.1	-1.6	-1.2
C	IL_7.4	6.97	8.05	0.15	11.8	31.4	0.21	32.2	10.2	31.9	-18.1548	-20	-18.5	-19.3	-1.8	-0.8
C	IL_7.5	5.79	5.36	0.11	14.1	31.5	0.17	32.2	9.1	32	-17.9623	-20.1	-17.6	-19.6	-2.1	-1.9
C	IL_7.5.5	5.77	4.24	0.1	13.7	31.5	0.31	32.2	8.7	32	-15.977	-17.9	-15.8	-17.4	-1.9	-1.6
C	IL_8.1	3.34	3.25	0.07	12.8	31.5	0.18	32.2	9.2	32.1	-17.6688	-20	-17.6	-19.9	-2.3	-2.3
C	IL_8.1.1	5.96	6.41	0.12	12.5	31.4	0.22	32.1	7.4	31.9	-17.1411	-20.1	-15.8	-19	-2.9	-3
C	IL_8.2.1	5.29	5.3	0.11	14.5	31.4	0.28	32.1	9	31.8	-16.9409	-18.3	-16.5	-17.8	-1.3	-1.3
C	IL_8.3	4.55	3.74	0.08	16.2	31.4	0.27	32.1	9.7	31.9	-16.8927	-18.6	-16.4	-18.3	-1.7	-1.9
C	IL_8.3.1	6.67	9.32	0.16	11.3	31.4	0.19	32.1	7.8	31.8	-17.8894	-20.5	-16.1	-19.4	-2.6	-3.3
C	IL_9.1	7.2	6.08	0.13	13.9	31.4	0.2	32.1	8.5	31.9	-16.542	-17.6	-16.3	-17.2	-1	-1
C	IL_9.1.2	6.32	5.92	0.12	13.7	31.3	0.24	32.1	9.8	31.7	-16.6633	-18.7	-17.5	-17.9	-2	-0.4
C	IL_9.1.3	6.61	2.75	0.09	13.3	31.5	0	32	16.2	32	-20.3315	-23.3	-20.6	-22.5	-3	-1.8
C	IL_9.2	6.15	5.85	0.12	11.9	31.3	0.29	32.1	9.1	31.9	-17.9257	-20.4	-17.8	-19.4	-2.4	-1.6
C	IL_9.2.5	5.07	3.69	0.09	13.7	31.5	0.23	32.2	12.4	32	-15.9581	-18.1	-15.8	-17.7	-2.1	-1.9
C	IL_9.2.6	8.05	7.41	0.15	11.7	31.4	0.29	32.1	11.2	31.8	-17.8416	-20	-18	-19.4	-2.2	-1.3
C	IL_9.3	5.39	5.83	0.11	12.7	31.2	0.26	32	8.9	31.6	-16.0804	-17.6	-15.5	-17.5	-1.5	-2.1
C	IL_9.3.1	5.5	6.31	0.12	12	31.3	0.17	32.1	6.1	31.8	-19.3396	-22.3	-19.4	-21.4	-2.9	-1.9
C	IL_9.3.2	6.37	13.54	0.2	11.3	31.4	0.15	32.1	9.9	31.8	-18.6377	-19.6	-18.2	-19.3	-1	-1
D	cvM82	6.2	5.88	0.12	10.9	31.3	0.16	32.1	10.3	32	-18.4	-20.4	-18	-19.7	-2	-1.7
D	IL_1.1	7.78	7.42	0.15	12.6	31.3	0.18	31.9	18.6	31.6	-19.8	-22.6	-19.7	-21.8	-2.7	-2.1
D	IL_1.1.2	7.35	7.34	0.15	10.8	31.3	0.16	32.1	16.1	31.7	-17.7	-19.4	-17.5	-18.7	-1.6	-1.2
D	IL_1.2	6.3	7.69	0.14	13.1	31.2	0.17	31.9	14	31.5	-18.1	-20.6	-18.1	-20.3	-2.4	-2.2
D	IL_1.3	12.1	4.59	0.17	14.8	31.3	0.14	32.2	16	31.6	-19.5	-21.4	-19.2	-20.4	-1.9	-1.2
D	IL_1.4	11.16	12.31	0.23	9.6	31.1	0.15	32	14.8	31.5	-17.7	-18.6	-17.6	-17.9	-0.9	-0.3
D	IL_1.4.18	11.89	8.38	0.2	10.5	31.3	0.18	32	17.9	31.7	-19.6	-20.9	-19.5	-21.2	-1.4	-1.6
D	IL_10.1	5.98	7.67	0.14	12.4	31.3	0.19	32	12.3	31.7	-16.8	-18.6	-16	-17.5	-1.7	-1.4
D	IL_10.2	8.64	10.29	0.19	16.1	31.3	0.06	32.1	19.9	31.6	-18.9	-21.2	-19	-20.2	-2.2	-1.1
D	IL_10.2.2	7.49	8.07	0.16	14.6	31.2	0.07	32.1	20.2	31.6	-19.2	-21	-18.5	-19.9	-1.7	-1.4
D	IL_10.3	6.61	10.59	0.17	9.6	31.4	0.33	31.9	11	31.9	-17.5	-18.8	-17.7	-19.1	-1.3	-1.4
D	IL_11.1	4.89	8.68	0.14	13.4	31.3	0.14	32.1	14.8	31.7	-18.5	-19.7	-18	-19.6	-1.2	-1.6
D	IL_11.2	7.2	7.32	0.15	12	31.3	0.21	32	7.5	31.8	-17.5	-19.3	-17.4	-18.1	-1.8	-0.7
D	IL_11.3	5.66	5.48	0.11	12.5	31.3	0.1	32.1	16.2	31.7	-18.4	-20	-17.9	-19.7	-1.6	-1.8
D	IL_11.4	7.26	7.55	0.15	10.8	31.3	0.18	32.1	10.7	31.7	-17.5	-19.4	-17.2	-18.7	-1.9	-1.5
D	IL_11.4.1	8.06	11.41	0.19	11.7	31.3	0.15	32	13	31.6	-17.3	-18.9	-16.8	-18	-1.6	-1.2
D	IL_12.1.1	7.52	8.82	0.16	10.4	31.3	0.2	32	13.7	31.7	-18.1	-19.4	-17.4	-18.9	-1.3	-1.5
D	IL_12.3	4.77	8.02	0.13	13.3	31.3	0.08	32.2	14	31.7	-16.2	-18.2	-15.8	-17.6	-2	-1.7
D	IL_12.3.1	6.28	9.9	0.16	12.4	31.2	0.13	32.1	12.9	31.6	-17.8	-19	-17.6	-18.2	-1.1	-0.6
D	IL_12.4	7.39	9.88	0.17	12.1	31.3	0.16	32.1	12.4	31.6	-17.8	-19.3	-17.7	-18.4	-1.4	-0.7
D	IL_12.4.1	8.3	6.82	0.15	12	31.4	0.24	32.1	14.6	31.8	-19.6	-21.6	-19.2	-21.1	-2	-1.8
D	IL_2.1	8.32	5.65	0.14	12.4	31.3	0.22	32.1	16.1	31.7	-19.7	-21.5	-19.2	-20.9	-1.8	-1.7
D	IL_2.1.1	7.49	7.96	0.15	12.1	31.3	0.09	32.1	14.5	31.7	-17.7	-19.6	-17.3	-18.9	-1.9	-1.6
D	IL_2.3	10.26	8.78	0.19	12.3	31.4	0.15	32.1	17.7	31.8	-17.9	-19.6	-17.5	-18.7	-1.7	-1.2
D	IL_2.5	7.17	7.37	0.15	13.2	31.5	0.22	32.1	14.6	31.9	-19.8	-22.9	-20.1	-22.4	-3	-2.2
D	IL_2.6	8.67	8.26	0.17	12.2	31.3	0.18	32.1	17.3	31.8	-19.5	-21.5	-19.3	-20.8	-1.9	-1.5
D	IL_3.1	7.22	6.37	0.14	12.5	31.3	0.09	32.1	16.6	31.7	-18	-20.2	-17.5	-19.5	-2.2	-2
D	IL_3.2	12.15	15.67	0.28	11.5	31.3	0.13	32.1	17.7	31.7	-19.5	-20.6	-19.1	-19.9	-1.1	-0.8
D	IL_3.3	6.06	8.56	0.15	11.6	31.4	0.15	32.1	13.5	31.8	-16.9	-18.8	-17.3	-18.1	-1.9	-0.8
D	IL_3.4	5.88	7.32	0.13	11.6	31.4	0.19	31.9	7.8	31.8	-17.5	-19.1	-17.2	-18.8	-1.6	-1.6
D	IL_3.5	8.35	7.1	0.15	12.2	31.3	0.08	32.1	17.5	31.6	-18.4	-20.1	-18.3	-19.4	-1.6	-1.1
D	IL_4.1	8.56	6.4	0.15	12.3	31.3	0.22	32.1	16.4	31.8	-18.1	-20.4	-18.1	-19.5	-2.3	-1.4
D	IL_4.2	7.26	10.48	0.18	11.2	31.1	0.13	32	15.2	31.5	-19.7	-21.1	-19.4	-20.4	-1.3	-0.9
D	IL_4.3	7.86	15.19	0.23	12.8	31.2	0.11	32	16.6	31.5	-19	-19.8	-18.5	-19.2	-0.8	-0.7
D	IL_4.3.2	6.27	8.89	0.15	11.7	31.2	0.14	32	12.6	31.6	-19	-20.4	-18.5	-20	-1.4	-1.5
D	IL_4.4	8.66	7.76	0.16	10.8	31.4	0.09	32.1	14.8	31.6	-17.1	-18.8	-16.9	-18.4	-1.7	-1.5
D	IL_5.1	6.59	9.26	0.16	10.1	31.4	0.29	31.9	10.9	31.9	-18.2	-20	-17.8	-19.4	-1.8	-1.6
D	IL_5.4	8.12	6.91	0.15	11.1	31.1	0.19	32	13.7	31.5	-17.7	-19.6	-17.8	-18.4	-1.8	-0.6
D	IL_6.1	11.32	10.07	0.21	11.7	31.4	0.16	32.1	15.9	31.7	-18.4	-20.8	-18	-19.8	-2.3	-1.7
D	IL_6.2	7.1	9.06	0.16	12.7	31.3	0.15	32.1	15.8	31.7	-18.1	-20.1	-17.9	-19.5	-2	-1.6
D	IL_6.2.2	10.32	10.58	0.21	10.2	31.4	0.19	32	18.7	31.7	-18.5	-21	-18.4	-20.6	-2.5	-2.2
D	IL_6.3	8.34	9.39	0.18	11.8	31.3	0.08	32.1	15.7	31.6	-18.3	-20.2	-17.8	-19	-1.8	-1.2
D	IL_6.4	6.39	8.15	0.15	9.9	31.3	0.31	31.9	11.8	31.8	-16.7	-18.4	-15.9	-17.7	-1.7	-1.7
D	IL_7.2	7.74	3.83	0.12	11	31.3	0.14	32.2	14.1	31.7	-19.2	-21.6	-18.7	-20.6	-2.4	-1.9
D	IL_7.3	7.72	6.16	0.14	10.8	31.3	0.12	32.2	12.7	31.8	-17.5	-19.6	-17.2	-18.9	-2	-1.7
D	IL_7.4	7.79	9.78	0.18	12.1	31.3	0.14	32.1	15.6	31.7	-17.5	-19.2	-17	-18.7	-1.7	-1.7
D	IL_7.4.1	5.16	6.33	0.11	11.5	31.4	0.22	32.1	11	31.9	-18.1	-20.1	-17.8	-19.5	-1.8	-1.7
D	IL_7.5	8.78	8.47	0.17	11.7	31.3	0.15	32.1	15.7	31.8	-18	-20	-17.5	-19	-2	-1.5
D	IL_7.5.5	7.32	4.53	0.12	12.9	31.4	0.14	32.2	16.3	31.8	-17.8	-20.8	-18.5	-19.6	-2.8	-1.1
D	IL_8.1	5.48	6.27	0.12	14.7	31.4	0.21	32.1	12.5	31.8	-18.3	-20.1	-17.9	-19.8	-1.8	-1.9
D	IL_8.1.1	4.74	7.29	0.12	10	31.3	0.3	31.9	11.2	31.9	-17.4	-19.6	-17	-19.1	-2.2	-2.1
D	IL_8.2.1	10.39	9.76	0.2	11.1	31.4	0.19	32.1	12.4	31.6	-20.5	-22.2	-20.4	-21.5	-1.7	-1.1
D	IL_8.3	7.66	8.58	0.16	10.5	31.3	0.16	32	17	31.7	-17.7	-19.5	-16.7	-18.7	-1.8	-2
D	IL_8.3.1	9.5	9.17	0.19	11.8	31.2	0.18	32	17	31.6	-19.8	-21.9	-19.2	-21.1	-2.1	-1.9
D	IL_9.1	11.83	9.92	0.22	11.9	31.3	0.16	32	15.6	31.6	-18.9	-20.6	-18.2	-19.6	-1.6	-1.3
D	IL_9.1.2	7.29	7.23	0.15	12.5	31.3	0.17	32.1	14.5	31.6	-20.2	-22.2	-20.3	-21.6	-2	-1.4
D	IL_9.1.3	9.29	6.56	0.16	10.5	31.5	0.22	32.1	13.7	31.9	-17.6	-19.3	-17.3	-18.5	-1.6	-1.2
D	IL_9.2	5.8	4.41	0.1	13.4	31.4	0.24	32.1	14.9	31.9	-17.4	-19.8	-17.2	-19.1	-2.3	-1.9
D	IL_9.2.5	6.31	7.93	0.14	12.7	31.3	0.17	32.1	13.2	31.7	-16.8	-18.6	-16.9	-17.7	-1.8	-0.7
D	IL_9.2.6	5.31	7.63	0.13	12.7	31.3	0.16	32.1	11.7	31.6	-17	-18.7	-16.9	-17.8	-1.7	-0.9
D	IL_9.3	5.63	5.01	0.11	11.9	31.2	0.33	31.9	13.4	31.7	-20.7	-22.9	-20.2	-22.3	-2.3	-2
D	IL_9.3.1	7.89	11.76	0.2	10.2	31	0.07	32	14	31.5	-19.5	-20.8	-19	-20.5	-1.2	-1.5
D	IL_9.3.2	6.16	9.37	0.16	10.5	31.2	0.21	32	10.9	31.7	-16.6	-17.1	-16.1	-16.8	-0.5	-0.7
