# Supplementary material
Source: Frontiers journal article supplement (https://www.frontiersin.org/articles/260772)
Supplement: Data_Sheet_5.XLSX [file Data_Sheet_5.XLSX]

## Sheet: Current
Linear modeling for summary leaf wax traits from GH 2014
	Trait summaries							Alteration	Shapiro-Wilks pvalue
	Minimum	1st quartile	Median	Mean	3rd quartile	Max	NA's		Regular	Sqrt	Log	Reciprocal	Arcsine		Transformation used
pct_iso-alkanes	3.34	5.782	6.57	6.946	7.735	13.09			3.445e-08	4.466e-05	0.006069	0.006844	3.17e-08		log
pct_anteiso-alkanes	2.75	5.815	7.26	7.478	9.045	15.67			0.0006494	0.6934	0.8311	2.673e-09	0.000571		log
Methyl_Index	0.07	0.12	0.14	0.1443	0.16	0.28			2.792e-05	0.01325	0.0001772	7.047e-06	2.792e-05		sqrt
n-alkane_CPI	9.6	11.62	12.5	12.45	13.28	17.4			0.0456	0.179	0.2259	0.0122	0.04237		log
n-alkane_ACL	31	31.3	31.35	31.35	31.4	31.8			4.822e-12	4.762e-12	4.702e-12	4.563e-12	4.834e-12		arcsine
anteiso_CPI	0	0.15	0.19	0.1961	0.2475	0.44			0.6253	6.326e-09	0.3316	NA	0.6253		(none)
anteiso_ACL	31.9	32.1	32.1	32.09	32.1	32.3			< 2.2e-16	< 2.2e-16	< 2.2e-16	< 2.2e-16	< 2.2e-16		(none)
iso_CPI	5.8	9.9	12.1	12.22	14.38	21.2			0.01325	0.2841	0.2674	8.334e-06	0.0117		sqrt
iso_ACL	31.1	31.7	31.8	31.79	31.9	32.3			6.76e-09	6.231e-09	5.763e-09	4.824e-09	6.881e-09		arcsine
eps13C_i.C31	-21.6	-18.9	-17.8	-17.88	-16.9	-12.9	8	absolute value	0.3822	0.1519	0.03625	0.0001938	0.3954		arcsine
eps13C_n.C31	-23.9	-20.8	-19.6	-19.63	-18.6	-14.3	8	absolute value	0.9192	0.6258	0.2061	0.001133	0.9267		arcsine
eps13C_i.C33	-21.3	-18.52	-17.6	-17.65	-16.5	-13.2	10	absolute value	0.2872	0.4309	0.3831	0.03204	0.2734		sqrt
eps13C_n.C33	-23.7	-20	-19	-19.07	-18	-13.8	8	absolute value	0.5222	0.4431	0.2003	0.001848	0.5131		(none)
n31.i31	-4	-2	-1.7	-1.719	-1.4	-0.3	8	absolute value	0.001743	0.0003854	0.0002453	< 2.2e-16	0.001731		(none)
n33.i33	-3.3	-1.7	-1.4	-1.401	-1	-0.2	10	absolute value	0.001161	0.004388	0.00279	< 2.2e-16	0.001156		sqrt
