# Supplementary material
Source: Frontiers journal article supplement (https://www.frontiersin.org/articles/260772)
Supplement: Data_Sheet_6.XLSX [file Data_Sheet_6.XLSX]

## Sheet: Sheet1
Heritability values
Greenhouse 2014 plants
	Variance
Transformed trait	il	Plot	Residual	H2	# ILs rep'd	# observations	Transformation
pct_anteiso-alkanes	0.18534	0.08807	0.20387	0.388326	73	202	log(x+1)
n31-i31	0.32853	0.08516	0.43318	0.387934	73	194	x
pct_iso-alkanes	0.13111	0.07391	0.14604	0.373469	73	202	log(x+1)
Methyl_Index	0.02769	0.01707	0.03381	0.352425	73	202	x^(1/2)
n33-i33	0.1108	0	0.2322	0.323032	73	192	x^(1/2)
n-alkane_CPI	0.05177	0.03947	0.07634	0.308927	73	202	log(x+1)
n-alkane_ACL	0.0005498	0.0004244	0.0008584	0.300011	73	202	asin(x/100)
anteiso_ACL	0.03136	0.02391	0.0584	0.275886	73	202	x
anteiso_CPI	0.03314	0.02575	0.06465	0.268253	73	202	x
iso_ACL	0.0006663	0.0008312	0.0011147	0.255072	73	202	asin(x/100)
Sum_Alk/area	0.3377	0.4505	0.5938	0.244356	73	202	x^(1/2)
iso_CPI	0.1728	0.3049	0.3137	0.218347	73	202	x^(1/2)
eps_iC31	0.004	0.004665	0.013333	0.181835	73	194	asin(-x/100)
eps_nC31	0.004618	0.005664	0.015303	0.180496	73	194	asin(-x/100)
eps_iC33	0.03357	0.05953	0.17062	0.127294	73	194	x^(1/2)
eps_nC33	0.4294	0.503	1.4888	0.17735	73	192	x
