# Supplementary material
Source: Frontiers journal article supplement (https://www.frontiersin.org/articles/260772)
Supplement: Data_Sheet_7.XLSX [file Data_Sheet_7.XLSX]

## Sheet: Sheet1
trait1	trait2	r.value	p.value	BH
anteiso_ACL	anteiso_ACL	1	NA	NA
anteiso_CPI	anteiso_ACL	0.055741	0.641887	0.812026
eps_iC31	anteiso_ACL	-0.146341	0.219961	0.366601
eps_nC31	anteiso_ACL	-0.0223459	0.852197	0.951792
eps_iC33	anteiso_ACL	-0.0357046	0.765889	0.886749
eps_nC33	anteiso_ACL	-0.0442143	0.712288	0.879885
n31.i31	anteiso_ACL	-0.100359	0.401587	0.600982
n33.i33	anteiso_ACL	-0.129088	0.279829	0.445182
iso_ACL	anteiso_ACL	0.402541	0.000455858	0.00239325
iso_CPI	anteiso_ACL	0.206268	0.0821483	0.169129
mindex	anteiso_ACL	-0.198567	0.0945037	0.183757
nalk_ACL	anteiso_ACL	0.503868	6.42e-06	5.6175e-05
nalk_CPI	anteiso_ACL	0.233018	0.0488587	0.111525
pct_iso	anteiso_ACL	-0.0395866	0.741284	0.882823
pct_anteiso	anteiso_ACL	-0.303236	0.00961751	0.0272929
anteiso_ACL	anteiso_CPI	0.055741	0.641887	0.812026
anteiso_CPI	anteiso_CPI	1	NA	NA
eps_iC31	anteiso_CPI	-0.150001	0.208516	0.353132
eps_nC31	anteiso_CPI	0.010341	0.931297	0.972484
eps_iC33	anteiso_CPI	-0.122741	0.304346	0.47696
eps_nC33	anteiso_CPI	-0.00661043	0.956051	0.97455
n31.i31	anteiso_CPI	-0.241441	0.0410348	0.0957479
n33.i33	anteiso_CPI	0.163748	0.16931	0.291435
iso_ACL	anteiso_CPI	0.216496	0.0677593	0.145199
iso_CPI	anteiso_CPI	-0.278983	0.0176375	0.0474855
mindex	anteiso_CPI	-0.433197	0.000144179	0.00100926
nalk_ACL	anteiso_CPI	0.0600725	0.616185	0.798759
nalk_CPI	anteiso_CPI	0.100226	0.402214	0.600982
pct_iso	anteiso_CPI	-0.0966235	0.419424	0.611661
pct_anteiso	anteiso_CPI	-0.514462	3.78372e-06	3.61173e-05
anteiso_ACL	eps_iC31	-0.146341	0.219961	0.366601
anteiso_CPI	eps_iC31	-0.150001	0.208516	0.353132
eps_iC31	eps_iC31	1	NA	NA
eps_nC31	eps_iC31	0.864236	0	0
eps_iC33	eps_iC31	0.926297	0	0
eps_nC33	eps_iC31	0.860591	0	0
n31.i31	eps_iC31	-0.0192401	0.872554	0.954356
n33.i33	eps_iC31	0.0733345	0.540407	0.736918
iso_ACL	eps_iC31	-0.253064	0.0319705	0.0799263
iso_CPI	eps_iC31	0.360152	0.00188678	0.00660372
mindex	eps_iC31	0.262431	0.0259458	0.0664467
nalk_ACL	eps_iC31	-0.194185	0.102158	0.195029
nalk_CPI	eps_iC31	-0.0759856	0.525824	0.726468
pct_iso	eps_iC31	0.373111	0.00124677	0.00484855
pct_anteiso	eps_iC31	0.0585568	0.625129	0.80047
anteiso_ACL	eps_nC31	-0.0223459	0.852197	0.951792
anteiso_CPI	eps_nC31	0.010341	0.931297	0.972484
eps_iC31	eps_nC31	0.864236	0	0
eps_nC31	eps_nC31	1	NA	NA
eps_iC33	eps_nC31	0.851405	0	0
eps_nC33	eps_nC31	0.967037	0	0
n31.i31	eps_nC31	-0.46847	3.32335e-05	0.000268425
n33.i33	eps_nC31	0.351285	0.00248105	0.00814094
iso_ACL	eps_nC31	-0.0509474	0.670827	0.838533
iso_CPI	eps_nC31	0.329539	0.00470287	0.0145236
mindex	eps_nC31	0.0163688	0.891448	0.96497
nalk_ACL	eps_nC31	-0.0339699	0.776961	0.886749
nalk_CPI	eps_nC31	-0.041739	0.72775	0.882823
pct_iso	eps_nC31	0.298122	0.0109748	0.0303252
pct_anteiso	eps_nC31	-0.182874	0.124153	0.22095
anteiso_ACL	eps_iC33	-0.0357046	0.765889	0.886749
anteiso_CPI	eps_iC33	-0.122741	0.304346	0.47696
eps_iC31	eps_iC33	0.926297	0	0
eps_nC31	eps_iC33	0.851405	0	0
eps_iC33	eps_iC33	1	NA	NA
eps_nC33	eps_iC33	0.86699	0	0
n31.i31	eps_iC33	-0.0832663	0.486816	0.692312
n33.i33	eps_iC33	-0.0384761	0.748297	0.882823
iso_ACL	eps_iC33	-0.215392	0.0692066	0.145334
iso_CPI	eps_iC33	0.389318	0.000724691	0.0030437
mindex	eps_iC33	0.201394	0.0898088	0.177923
nalk_ACL	eps_iC33	-0.142577	0.232186	0.37507
nalk_CPI	eps_iC33	0.0143418	0.904824	0.969454
pct_iso	eps_iC33	0.353238	0.00233738	0.00791694
pct_anteiso	eps_iC33	-0.00382661	0.97455	0.97455
anteiso_ACL	eps_nC33	-0.0442143	0.712288	0.879885
anteiso_CPI	eps_nC33	-0.00661043	0.956051	0.97455
eps_iC31	eps_nC33	0.860591	0	0
eps_nC31	eps_nC33	0.967037	0	0
eps_iC33	eps_nC33	0.86699	0	0
eps_nC33	eps_nC33	1	NA	NA
n31.i31	eps_nC33	-0.422631	0.000217072	0.00126625
n33.i33	eps_nC33	0.389455	0.000721284	0.0030437
iso_ACL	eps_nC33	-0.0326373	0.785497	0.886852
iso_CPI	eps_nC33	0.32971	0.00468007	0.0145236
mindex	eps_nC33	-0.0117952	0.921665	0.972484
nalk_ACL	eps_nC33	-0.0344568	0.773849	0.886749
nalk_CPI	eps_nC33	-0.0395234	0.741682	0.882823
pct_iso	eps_nC33	0.242479	0.0401475	0.0957479
pct_anteiso	eps_nC33	-0.186747	0.116247	0.217963
anteiso_ACL	n31.i31	-0.100359	0.401587	0.600982
anteiso_CPI	n31.i31	-0.241441	0.0410348	0.0957479
eps_iC31	n31.i31	-0.0192401	0.872554	0.954356
eps_nC31	n31.i31	-0.46847	3.32335e-05	0.000268425
eps_iC33	n31.i31	-0.0832663	0.486816	0.692312
eps_nC33	n31.i31	-0.422631	0.000217072	0.00126625
n31.i31	n31.i31	1	NA	NA
n33.i33	n31.i31	-0.696536	1.0894e-11	1.27096e-10
iso_ACL	n31.i31	-0.311535	0.00772529	0.0231759
iso_CPI	n31.i31	0.070075	0.558602	0.742446
mindex	n31.i31	0.42846	0.000173497	0.0010716
nalk_ACL	n31.i31	-0.221708	0.0612481	0.136831
nalk_CPI	n31.i31	0.00971655	0.935437	0.972484
pct_iso	n31.i31	0.0830572	0.487915	0.692312
pct_anteiso	n31.i31	0.465107	3.84931e-05	0.000288698
anteiso_ACL	n33.i33	-0.129088	0.279829	0.445182
anteiso_CPI	n33.i33	0.163748	0.16931	0.291435
eps_iC31	n33.i33	0.0733345	0.540407	0.736918
eps_nC31	n33.i33	0.351285	0.00248105	0.00814094
eps_iC33	n33.i33	-0.0384761	0.748297	0.882823
eps_nC33	n33.i33	0.389455	0.000721284	0.0030437
n31.i31	n33.i33	-0.696536	1.0894e-11	1.27096e-10
n33.i33	n33.i33	1	NA	NA
iso_ACL	n33.i33	0.220531	0.0626728	0.137097
iso_CPI	n33.i33	-0.142794	0.231468	0.37507
mindex	n33.i33	-0.395457	0.000585743	0.00279559
nalk_ACL	n33.i33	0.0993463	0.406378	0.600982
nalk_CPI	n33.i33	-0.0815024	0.496124	0.694574
pct_iso	n33.i33	-0.183425	0.123004	0.22095
pct_anteiso	n33.i33	-0.364196	0.00166095	0.00601377
anteiso_ACL	iso_ACL	0.402541	0.000455858	0.00239325
anteiso_CPI	iso_ACL	0.216496	0.0677593	0.145199
eps_iC31	iso_ACL	-0.253064	0.0319705	0.0799263
eps_nC31	iso_ACL	-0.0509474	0.670827	0.838533
eps_iC33	iso_ACL	-0.215392	0.0692066	0.145334
eps_nC33	iso_ACL	-0.0326373	0.785497	0.886852
n31.i31	iso_ACL	-0.311535	0.00772529	0.0231759
n33.i33	iso_ACL	0.220531	0.0626728	0.137097
iso_ACL	iso_ACL	1	NA	NA
iso_CPI	iso_ACL	-0.101155	0.397846	0.600982
mindex	iso_ACL	-0.383051	0.000896797	0.00362168
nalk_ACL	iso_ACL	0.818993	0	0
nalk_CPI	iso_ACL	-0.070805	0.554501	0.742446
pct_iso	iso_ACL	-0.20519	0.0837964	0.169204
pct_anteiso	iso_ACL	-0.389637	0.000716786	0.0030437
anteiso_ACL	iso_CPI	0.206268	0.0821483	0.169129
anteiso_CPI	iso_CPI	-0.278983	0.0176375	0.0474855
eps_iC31	iso_CPI	0.360152	0.00188678	0.00660372
eps_nC31	iso_CPI	0.329539	0.00470287	0.0145236
eps_iC33	iso_CPI	0.389318	0.000724691	0.0030437
eps_nC33	iso_CPI	0.32971	0.00468007	0.0145236
n31.i31	iso_CPI	0.070075	0.558602	0.742446
n33.i33	iso_CPI	-0.142794	0.231468	0.37507
iso_ACL	iso_CPI	-0.101155	0.397846	0.600982
iso_CPI	iso_CPI	1	NA	NA
mindex	iso_CPI	0.185363	0.119027	0.219259
nalk_ACL	iso_CPI	-0.00752018	0.950009	0.97455
nalk_CPI	iso_CPI	0.171908	0.148758	0.260326
pct_iso	iso_CPI	0.409319	0.000356749	0.00197151
pct_anteiso	iso_CPI	0.00472699	0.968565	0.97455
anteiso_ACL	mindex	-0.198567	0.0945037	0.183757
anteiso_CPI	mindex	-0.433197	0.000144179	0.00100926
eps_iC31	mindex	0.262431	0.0259458	0.0664467
eps_nC31	mindex	0.0163688	0.891448	0.96497
eps_iC33	mindex	0.201394	0.0898088	0.177923
eps_nC33	mindex	-0.0117952	0.921665	0.972484
n31.i31	mindex	0.42846	0.000173497	0.0010716
n33.i33	mindex	-0.395457	0.000585743	0.00279559
iso_ACL	mindex	-0.383051	0.000896797	0.00362168
iso_CPI	mindex	0.185363	0.119027	0.219259
mindex	mindex	1	NA	NA
nalk_ACL	mindex	-0.249693	0.0344074	0.0840181
nalk_CPI	mindex	-0.4312	0.000155929	0.00102328
pct_iso	mindex	0.661666	2.48825e-10	2.61266e-09
pct_anteiso	mindex	0.856693	0	0
anteiso_ACL	nalk_ACL	0.503868	6.42e-06	5.6175e-05
anteiso_CPI	nalk_ACL	0.0600725	0.616185	0.798759
eps_iC31	nalk_ACL	-0.194185	0.102158	0.195029
eps_nC31	nalk_ACL	-0.0339699	0.776961	0.886749
eps_iC33	nalk_ACL	-0.142577	0.232186	0.37507
eps_nC33	nalk_ACL	-0.0344568	0.773849	0.886749
n31.i31	nalk_ACL	-0.221708	0.0612481	0.136831
n33.i33	nalk_ACL	0.0993463	0.406378	0.600982
iso_ACL	nalk_ACL	0.818993	0	0
iso_CPI	nalk_ACL	-0.00752018	0.950009	0.97455
mindex	nalk_ACL	-0.249693	0.0344074	0.0840181
nalk_ACL	nalk_ACL	1	NA	NA
nalk_CPI	nalk_ACL	0.0209791	0.861145	0.951792
pct_iso	nalk_ACL	-0.0619689	0.605074	0.794159
pct_anteiso	nalk_ACL	-0.30815	0.00845364	0.0246564
anteiso_ACL	nalk_CPI	0.233018	0.0488587	0.111525
anteiso_CPI	nalk_CPI	0.100226	0.402214	0.600982
eps_iC31	nalk_CPI	-0.0759856	0.525824	0.726468
eps_nC31	nalk_CPI	-0.041739	0.72775	0.882823
eps_iC33	nalk_CPI	0.0143418	0.904824	0.969454
eps_nC33	nalk_CPI	-0.0395234	0.741682	0.882823
n31.i31	nalk_CPI	0.00971655	0.935437	0.972484
n33.i33	nalk_CPI	-0.0815024	0.496124	0.694574
iso_ACL	nalk_CPI	-0.070805	0.554501	0.742446
iso_CPI	nalk_CPI	0.171908	0.148758	0.260326
mindex	nalk_CPI	-0.4312	0.000155929	0.00102328
nalk_ACL	nalk_CPI	0.0209791	0.861145	0.951792
nalk_CPI	nalk_CPI	1	NA	NA
pct_iso	nalk_CPI	-0.371503	0.00131375	0.00492657
pct_anteiso	nalk_CPI	-0.39755	0.000544249	0.00272125
anteiso_ACL	pct_iso	-0.0395866	0.741284	0.882823
anteiso_CPI	pct_iso	-0.0966235	0.419424	0.611661
eps_iC31	pct_iso	0.373111	0.00124677	0.00484855
eps_nC31	pct_iso	0.298122	0.0109748	0.0303252
eps_iC33	pct_iso	0.353238	0.00233738	0.00791694
eps_nC33	pct_iso	0.242479	0.0401475	0.0957479
n31.i31	pct_iso	0.0830572	0.487915	0.692312
n33.i33	pct_iso	-0.183425	0.123004	0.22095
iso_ACL	pct_iso	-0.20519	0.0837964	0.169204
iso_CPI	pct_iso	0.409319	0.000356749	0.00197151
mindex	pct_iso	0.661666	2.48825e-10	2.61266e-09
nalk_ACL	pct_iso	-0.0619689	0.605074	0.794159
nalk_CPI	pct_iso	-0.371503	0.00131375	0.00492657
pct_iso	pct_iso	1	NA	NA
pct_anteiso	pct_iso	0.263618	0.025256	0.066297
anteiso_ACL	pct_anteiso	-0.303236	0.00961751	0.0272929
anteiso_CPI	pct_anteiso	-0.514462	3.78372e-06	3.61173e-05
eps_iC31	pct_anteiso	0.0585568	0.625129	0.80047
eps_nC31	pct_anteiso	-0.182874	0.124153	0.22095
eps_iC33	pct_anteiso	-0.00382661	0.97455	0.97455
eps_nC33	pct_anteiso	-0.186747	0.116247	0.217963
n31.i31	pct_anteiso	0.465107	3.84931e-05	0.000288698
n33.i33	pct_anteiso	-0.364196	0.00166095	0.00601377
iso_ACL	pct_anteiso	-0.389637	0.000716786	0.0030437
iso_CPI	pct_anteiso	0.00472699	0.968565	0.97455
mindex	pct_anteiso	0.856693	0	0
nalk_ACL	pct_anteiso	-0.30815	0.00845364	0.0246564
nalk_CPI	pct_anteiso	-0.39755	0.000544249	0.00272125
pct_iso	pct_anteiso	0.263618	0.025256	0.066297
pct_anteiso	pct_anteiso	1	NA	NA
