# Supplementary material
Source: Frontiers journal article supplement (https://www.frontiersin.org/articles/260772)
Supplement: Data_Sheet_8.XLSX [file Data_Sheet_8.XLSX]

## Sheet: Sheet1
trait1	trati2	r.value	p.value	BH
DEV.CompAll	DEV.CompAll	1	NA	NA
DEV.CompInt	DEV.CompAll	0.900506	0	0
DEV.CompPri	DEV.CompAll	0.827642	0	0
DEV.CompRachis	DEV.CompAll	0.918524	0	0
DEV.CompSec	DEV.CompAll	0.924019	0	0
DEV.CotPaveAR	DEV.CompAll	0.0286314	0.809979	0.93732
DEV.CotPaveArea	DEV.CompAll	0.227385	0.0530307	0.278411
DEV.CotPaveCirc	DEV.CompAll	-0.175953	0.136476	0.456378
DEV.CotPaveCnt	DEV.CompAll	-0.223282	0.0575856	0.292083
DEV.CotPaveRound	DEV.CompAll	-0.0377638	0.751093	0.917012
DEV.CotPaveSolid	DEV.CompAll	0.123473	0.298	0.649611
DEV.CotStom	DEV.CompAll	-0.178271	0.131304	0.447593
DEV.CotStomInd	DEV.CompAll	0.0224917	0.85019	0.951332
DEV.FlowTime	DEV.CompAll	0.324783	0.00608438	0.0679265
DEV.LatLfSize	DEV.CompAll	-0.354838	0.00206787	0.0303955
DEV.LatPC1	DEV.CompAll	0.136401	0.249862	0.599592
DEV.LatPC2	DEV.CompAll	-0.309947	0.00761814	0.0796444
DEV.LatPC3	DEV.CompAll	0.284524	0.0147006	0.125188
DEV.LatPC4	DEV.CompAll	-0.405868	0.000367302	0.00778178
DEV.LatPC5	DEV.CompAll	0.366469	0.00142869	0.0229099
DEV.LfAbStom	DEV.CompAll	0.418209	0.000231615	0.00533116
DEV.LfAdStom	DEV.CompAll	0.165155	0.162613	0.494737
DEV.LfStomRatio	DEV.CompAll	0.0608725	0.608936	0.855238
DEV.LftAR	DEV.CompAll	-0.0982044	0.408477	0.737851
DEV.LftCirc	DEV.CompAll	-0.397044	0.000505301	0.0100578
DEV.LftRound	DEV.CompAll	0.0824078	0.488234	0.787874
DEV.LftSolid	DEV.CompAll	0.454461	5.37077e-05	0.00160127
DEV.TermLfSize	DEV.CompAll	-0.450975	6.22635e-05	0.00181055
DEV.TermPC1	DEV.CompAll	0.11687	0.324779	0.672566
DEV.TermPC3	DEV.CompAll	0.354776	0.00207185	0.0304154
DEV.TermPC4	DEV.CompAll	-0.413396	0.000277833	0.00617148
DEV.TermPC5	DEV.CompAll	0.438449	0.000104528	0.0027761
ENZ.aa_cont	DEV.CompAll	-0.0806835	0.4884	0.787977
ENZ.ac_inv	DEV.CompAll	-0.122925	0.290102	0.64175
ENZ.aconi	DEV.CompAll	0.108708	0.34991	0.69395
ENZ.agpa	DEV.CompAll	-0.254282	0.0277021	0.18914
ENZ.ala_ami	DEV.CompAll	0.11661	0.315784	0.666655
ENZ.asp_ami	DEV.CompAll	0.0786056	0.499704	0.795962
ENZ.fbp_ald	DEV.CompAll	-0.126753	0.275227	0.625011
ENZ.fru_kin	DEV.CompAll	0.0378947	0.745181	0.915026
ENZ.fructose_e	DEV.CompAll	-0.0108544	0.925855	0.977048
ENZ.fuma	DEV.CompAll	-0.0314083	0.789084	0.930687
ENZ.g6pdh	DEV.CompAll	-0.0196856	0.865964	0.955984
ENZ.gadph	DEV.CompAll	-0.00229665	0.984291	0.995055
ENZ.gapdh_p	DEV.CompAll	-0.147669	0.203016	0.549032
ENZ.gluc_kin	DEV.CompAll	0.0789884	0.497611	0.794683
ENZ.glucose_e	DEV.CompAll	0.553465	2.155e-07	1.31587e-05
ENZ.gluta_dh	DEV.CompAll	-0.217744	0.0588207	0.295599
ENZ.iso_ci_dh	DEV.CompAll	-0.00188653	0.987096	0.996359
ENZ.mal_dh	DEV.CompAll	0.238414	0.0380784	0.22847
ENZ.pep_car	DEV.CompAll	-0.0512098	0.660425	0.87928
ENZ.ph_fru_kin	DEV.CompAll	-0.0460424	0.692883	0.894277
ENZ.ph_fru_kin_a	DEV.CompAll	-0.0285714	0.806455	0.935939
ENZ.ph_glu_is_c	DEV.CompAll	-0.0403281	0.729428	0.909789
ENZ.ph_glu_is_t	DEV.CompAll	-0.0465892	0.689421	0.892772
ENZ.ph_glu_mut	DEV.CompAll	-0.130116	0.262587	0.61316
ENZ.ph_gly_kin	DEV.CompAll	0.21419	0.0631769	0.308289
ENZ.pro_con	DEV.CompAll	0.0907177	0.435767	0.75579
ENZ.pyr_kin	DEV.CompAll	-0.00451128	0.969148	0.989647
ENZ.shik_de	DEV.CompAll	0.193985	0.0931355	0.377476
ENZ.starch	DEV.CompAll	-0.163009	0.162306	0.494505
ENZ.suc_p_syn	DEV.CompAll	-0.034067	0.770171	0.923802
ENZ.suc_syn	DEV.CompAll	-0.0666029	0.567564	0.833976
ENZ.succ_co_l	DEV.CompAll	0.0654079	0.582464	0.842143
ENZ.sucrose_e	DEV.CompAll	0.0962406	0.408224	0.737731
ENZ.tr_ph_iso	DEV.CompAll	-0.0267669	0.818463	0.940666
ENZ.udp_glu	DEV.CompAll	-0.0732741	0.529317	0.81403
MET.a_tocopherol	DEV.CompAll	0.0439645	0.706097	0.900032
MET.aconitate	DEV.CompAll	-0.0564121	0.645229	0.872472
MET.alanine	DEV.CompAll	0.0471087	0.686138	0.89126
MET.arabinose	DEV.CompAll	0.0667753	0.571887	0.836518
MET.arginine	DEV.CompAll	-0.147198	0.207584	0.554245
MET.asparagine	DEV.CompAll	-0.261381	0.022566	0.165986
MET.aspartate	DEV.CompAll	-0.0268216	0.818098	0.940638
MET.b_alanine	DEV.CompAll	0.0938072	0.420232	0.745557
MET.benzoate	DEV.CompAll	-0.14276	0.221769	0.570343
MET.citramalate	DEV.CompAll	0.242871	0.0345177	0.215793
MET.citrate	DEV.CompAll	0.170198	0.141586	0.463978
MET.cysteine	DEV.CompAll	0.204438	0.0785126	0.344855
MET.dehydroascorbate	DEV.CompAll	0.217389	0.059245	0.297139
MET.erythritol	DEV.CompAll	0.135284	0.24394	0.59415
MET.fa16_0	DEV.CompAll	0.00317157	0.978307	0.992287
MET.fa18_0	DEV.CompAll	-0.0146275	0.900197	0.968461
MET.fa18_2	DEV.CompAll	-0.17124	0.144624	0.468784
MET.fructose	DEV.CompAll	0.32339	0.00437847	0.0539657
MET.fructose_6p	DEV.CompAll	0.221053	0.0549887	0.284727
MET.fucose	DEV.CompAll	0.150152	0.201631	0.547797
MET.fumarate	DEV.CompAll	-0.0410242	0.726744	0.9086
MET.gaba	DEV.CompAll	0.128284	0.269423	0.620663
MET.galactose	DEV.CompAll	0.109747	0.345297	0.690643
MET.galacturonate	DEV.CompAll	0.157129	0.175241	0.512956
MET.gluconate	DEV.CompAll	-0.0534792	0.646362	0.873173
MET.glucose	DEV.CompAll	0.357485	0.00152286	0.0242255
MET.glucose_6p	DEV.CompAll	0.190431	0.0994065	0.390066
MET.glutamate	DEV.CompAll	-0.0113514	0.922998	0.976144
MET.glutamine	DEV.CompAll	-0.063316	0.597234	0.849497
MET.glycerate	DEV.CompAll	-0.0611073	0.600012	0.850306
MET.glycerate_3p	DEV.CompAll	0.163244	0.180165	0.520613
MET.glycerol	DEV.CompAll	0.0517586	0.661417	0.879812
MET.glycerol_1p	DEV.CompAll	0.224197	0.051538	0.273183
MET.glycine	DEV.CompAll	-0.0533424	0.647206	0.873667
MET.homoserine	DEV.CompAll	-0.0191934	0.869285	0.956787
MET.inositol	DEV.CompAll	0.234231	0.0416939	0.241258
MET.inositol_1p	DEV.CompAll	-0.018756	0.872239	0.958168
MET.isocitrate	DEV.CompAll	0.117321	0.312823	0.663794
MET.isoleucine	DEV.CompAll	-0.0980998	0.399186	0.731599
MET.isomaltose	DEV.CompAll	-0.0149722	0.899249	0.968236
MET.l_ascorbate	DEV.CompAll	-0.0731721	0.532704	0.815897
MET.leucine	DEV.CompAll	-0.138373	0.233237	0.582801
MET.lysine	DEV.CompAll	-0.138811	0.231748	0.581099
MET.malate	DEV.CompAll	0.0443472	0.703656	0.899011
MET.maleate	DEV.CompAll	-0.264856	0.0256066	0.18029
MET.maltitol	DEV.CompAll	0.140178	0.227139	0.575899
MET.maltose	DEV.CompAll	0.21583	0.061135	0.302688
MET.mannitol	DEV.CompAll	-0.0224751	0.848216	0.950902
MET.mannose	DEV.CompAll	0.113165	0.33039	0.678043
MET.methionine	DEV.CompAll	-0.0862338	0.458881	0.770081
MET.oxoproline_5	DEV.CompAll	-0.0862623	0.480951	0.783487
MET.phenylalanine	DEV.CompAll	0.0655913	0.573475	0.837002
MET.phosphate	DEV.CompAll	-0.00628845	0.957004	0.986004
MET.proline	DEV.CompAll	0.201148	0.0814446	0.351548
MET.putrescine	DEV.CompAll	-0.126726	0.275332	0.625146
MET.quinate	DEV.CompAll	0.287464	0.0118054	0.10821
MET.rhamnose	DEV.CompAll	-0.0787697	0.498806	0.795196
MET.ribose	DEV.CompAll	0.05892	0.613152	0.857499
MET.s_me_cysteine	DEV.CompAll	-0.161735	0.165658	0.499393
MET.saccharate	DEV.CompAll	0.0273684	0.814456	0.939177
MET.serine	DEV.CompAll	0.0405468	0.728018	0.908948
MET.shikimate	DEV.CompAll	0.0806804	0.500493	0.796267
MET.sorbitol	DEV.CompAll	0.0494168	0.673732	0.88558
MET.succinate	DEV.CompAll	0.0630759	0.588295	0.845222
MET.sucrose	DEV.CompAll	0.127382	0.272833	0.623625
MET.t4_ho_proline	DEV.CompAll	0.0405405	0.73345	0.910992
MET.threonate	DEV.CompAll	0.0917567	0.430507	0.752861
MET.threonine	DEV.CompAll	-0.0602871	0.604925	0.852943
MET.trehalose	DEV.CompAll	-0.0178811	0.878152	0.9601
MET.tryptophan	DEV.CompAll	-0.0305673	0.793225	0.93209
MET.tyrosine	DEV.CompAll	-0.0946275	0.416162	0.742623
MET.uracil	DEV.CompAll	-0.157525	0.177101	0.515433
MET.valine	DEV.CompAll	-0.190239	0.0997533	0.390769
MOR.Anther_L_W	DEV.CompAll	0.156814	0.179089	0.518791
MOR.Anther_length	DEV.CompAll	0.0881081	0.45224	0.766505
MOR.Anther_width	DEV.CompAll	-0.122248	0.296098	0.648218
MOR.BM	DEV.CompAll	0.471949	1.91577e-05	0.00067307
MOR.BX	DEV.CompAll	0.394936	0.000454053	0.00925513
MOR.BY	DEV.CompAll	0.401138	0.000361585	0.00770152
MOR.EA	DEV.CompAll	-0.228285	0.04885	0.264689
MOR.flowers_inf	DEV.CompAll	-0.158222	0.200966	0.547193
MOR.flowers_plant	DEV.CompAll	0.232181	0.0586715	0.295269
MOR.FN	DEV.CompAll	0.329531	0.00388946	0.0494871
MOR.Fruit_L_Pt	DEV.CompAll	0.0180085	0.878121	0.9601
MOR.Fruit_L_W	DEV.CompAll	0.184154	0.113743	0.417447
MOR.Fruit_length	DEV.CompAll	0.122475	0.295193	0.647173
MOR.Fruit_locule	DEV.CompAll	-0.0633522	0.589215	0.845962
MOR.Fruit_peric_thick	DEV.CompAll	0.218122	0.0601118	0.300141
MOR.Fruit_W_Pt	DEV.CompAll	-0.16239	0.16393	0.496639
MOR.Fruit_width	DEV.CompAll	0.0234424	0.841766	0.949495
MOR.FW	DEV.CompAll	0.0151351	0.897453	0.967696
MOR.HI	DEV.CompAll	-0.217411	0.060973	0.302282
MOR.inf	DEV.CompAll	0.316896	0.00898013	0.0895004
MOR.Ovary_L_W	DEV.CompAll	0.0476529	0.684753	0.890652
MOR.Ovary_length	DEV.CompAll	0.146999	0.208206	0.554706
MOR.Ovary_width	DEV.CompAll	0.0874253	0.455765	0.768753
MOR.PW	DEV.CompAll	0.500939	4.7098e-06	0.000203263
MOR.RED	DEV.CompAll	0.281536	0.0144075	0.123587
MOR.Seed_L_W	DEV.CompAll	-0.0902134	0.441466	0.75971
MOR.Seed_Length	DEV.CompAll	-0.0290325	0.807368	0.936182
MOR.Seed_Width	DEV.CompAll	-0.0288478	0.805927	0.935873
MOR.Seed_Wt	DEV.CompAll	0.179687	0.122932	0.433966
MOR.SN_fruit	DEV.CompAll	0.107539	0.358441	0.701277
MOR.SN_fruit_unit	DEV.CompAll	0.0632148	0.590025	0.846089
MOR.SN_plant	DEV.CompAll	0.286003	0.0128662	0.114884
MOR.Style_L_W	DEV.CompAll	0.206771	0.075092	0.337199
MOR.Style_length	DEV.CompAll	0.191778	0.0992932	0.38984
MOR.Style_width	DEV.CompAll	-0.0871977	0.456943	0.769558
MOR.SW_fruit	DEV.CompAll	0.149018	0.201955	0.547806
MOR.SW_plant	DEV.CompAll	0.307511	0.00728004	0.0771447
MOR.TY	DEV.CompAll	0.309218	0.00694594	0.0747403
SED.Adenine_seeds	DEV.CompAll	-0.0445471	0.718314	0.905042
SED.Alanine_seeds	DEV.CompAll	-0.10448	0.375674	0.71402
SED.Arginine_seeds	DEV.CompAll	-0.145739	0.215355	0.56344
SED.Asparagine_seeds	DEV.CompAll	-0.00656053	0.95576	0.985721
SED.Aspartate_seeds	DEV.CompAll	0.114698	0.330508	0.678136
SED.Benzoate_seeds	DEV.CompAll	0.122399	0.298849	0.650547
SED.Citrate_seeds	DEV.CompAll	0.0691151	0.558461	0.82924
SED.Erythritol_seeds	DEV.CompAll	0.305117	0.00820825	0.0841466
SED.Fructose_seeds	DEV.CompAll	-0.00848575	0.942796	0.982774
SED.Fumarate_seeds	DEV.CompAll	0.0182599	0.877282	0.959861
SED.GABA_seeds	DEV.CompAll	0.0594891	0.614628	0.857997
SED.Galactinol_seeds	DEV.CompAll	-0.183532	0.134095	0.452093
SED.Galactonic_acid_1_4_lactone_seeds	DEV.CompAll	-0.000340615	0.997702	0.999587
SED.Glutamate_seeds	DEV.CompAll	-0.000755276	0.994904	0.998654
SED.Glycerate_seeds	DEV.CompAll	0.282695	0.0146694	0.124999
SED.Glycerol_1P_seeds	DEV.CompAll	0.0810218	0.492562	0.791075
SED.Glycerol_seeds	DEV.CompAll	-0.0275898	0.815497	0.939646
SED.Glycine_seeds	DEV.CompAll	-0.0297816	0.80113	0.934303
SED.Glycolate_seeds	DEV.CompAll	-0.0596273	0.62648	0.863771
SED.Isoleucine_seeds	DEV.CompAll	-0.0713662	0.545688	0.821746
SED.Lysine_seeds	DEV.CompAll	-0.0192077	0.870965	0.957395
SED.Malate_seeds	DEV.CompAll	0.236461	0.0425252	0.244252
SED.Maltotriose_seeds	DEV.CompAll	-0.0737489	0.550048	0.824301
SED.Melezitose_seeds	DEV.CompAll	0.245376	0.0351005	0.217944
SED.Myo_Inositol_seeds	DEV.CompAll	-0.192714	0.099965	0.391013
SED.NA_sugar_seeds	DEV.CompAll	0.0277675	0.81433	0.939175
SED.Nicotinate_seeds	DEV.CompAll	-0.0167337	0.89145	0.965865
SED.Nonanoate_seeds	DEV.CompAll	0.177349	0.147943	0.473816
SED.Octadecanoate_seeds	DEV.CompAll	-0.121836	0.301094	0.652233
SED.Phenylalanine_seeds	DEV.CompAll	0.0668937	0.571204	0.835912
SED.Phosphate_seeds	DEV.CompAll	0.0717216	0.543684	0.821126
SED.Proline_seeds	DEV.CompAll	-0.114017	0.333408	0.680219
SED.Putrescine_seeds	DEV.CompAll	-0.0163643	0.889937	0.965399
SED.Raffinose_seeds	DEV.CompAll	0.115735	0.326127	0.673724
SED.Salicylate_seeds	DEV.CompAll	0.0218141	0.853637	0.952398
SED.Serine_seeds	DEV.CompAll	-0.0698556	0.554243	0.827131
SED.Succinate_seeds	DEV.CompAll	-0.0607703	0.622515	0.861968
SED.Threonine_seeds	DEV.CompAll	-0.113839	0.334167	0.68055
SED.Trehalose_alpha_alpha_seeds	DEV.CompAll	0.179613	0.139741	0.461495
SED.Tyrosine_seeds	DEV.CompAll	-0.0943502	0.423943	0.74817
SED.Uracil_seeds	DEV.CompAll	-0.020613	0.867491	0.956258
SED.Urea_seeds	DEV.CompAll	0.0607034	0.607409	0.854467
SED.Valine_seeds	DEV.CompAll	-0.0719585	0.54235	0.820607
SED.X4_Hydroxy_Benzoate_seeds	DEV.CompAll	0.0500407	0.672001	0.884635
WAX.anteiso_ACL	DEV.CompAll	0.14814	0.214281	0.562314
WAX.anteiso_CPI	DEV.CompAll	0.0913638	0.445298	0.762439
WAX.eps_iC31	DEV.CompAll	-0.00437327	0.970916	0.990611
WAX.eps_nC31	DEV.CompAll	-0.0431217	0.719099	0.905144
WAX.eps_iC33	DEV.CompAll	0.0766287	0.522317	0.808989
WAX.eps_nC33	DEV.CompAll	-0.0388641	0.745844	0.915288
WAX.n31.i31	DEV.CompAll	0.0559332	0.640738	0.871227
WAX.n33.i33	DEV.CompAll	-0.121233	0.310374	0.661098
WAX.iso_ACL	DEV.CompAll	-0.0066782	0.9556	0.985721
WAX.iso_CPI	DEV.CompAll	-0.0238279	0.842516	0.949756
WAX.mindex	DEV.CompAll	0.0727109	0.543865	0.821244
WAX.nalk_ACL	DEV.CompAll	0.0268273	0.822996	0.942194
WAX.nalk_CPI	DEV.CompAll	-0.240948	0.0414626	0.24032
WAX.pct_iso	DEV.CompAll	0.144543	0.225743	0.574549
WAX.pct_anteiso	DEV.CompAll	0.0209017	0.861652	0.954449
DEV.CompAll	DEV.CompInt	0.900506	0	0
DEV.CompInt	DEV.CompInt	1	NA	NA
DEV.CompPri	DEV.CompInt	0.762816	1.33227e-15	3.84105e-13
DEV.CompRachis	DEV.CompInt	0.991962	0	0
DEV.CompSec	DEV.CompInt	0.700123	1.948e-12	3.70597e-10
DEV.CotPaveAR	DEV.CompInt	0.037517	0.752668	0.917107
DEV.CotPaveArea	DEV.CompInt	0.192799	0.102214	0.394988
DEV.CotPaveCirc	DEV.CompInt	-0.161514	0.172208	0.508605
DEV.CotPaveCnt	DEV.CompInt	-0.196872	0.0950341	0.3812
DEV.CotPaveRound	DEV.CompInt	-0.0472973	0.691105	0.893518
DEV.CotPaveSolid	DEV.CompInt	0.101475	0.39297	0.727697
DEV.CotStom	DEV.CompInt	-0.137761	0.245128	0.59528
DEV.CotStomInd	DEV.CompInt	0.0504134	0.671881	0.884519
DEV.FlowTime	DEV.CompInt	0.346199	0.00332775	0.0438436
DEV.LatLfSize	DEV.CompInt	-0.3408	0.00317356	0.0423434
DEV.LatPC1	DEV.CompInt	0.241548	0.0395171	0.233743
DEV.LatPC2	DEV.CompInt	-0.246699	0.0353738	0.218846
DEV.LatPC3	DEV.CompInt	0.126867	0.284813	0.63624
DEV.LatPC4	DEV.CompInt	-0.206189	0.0800954	0.348793
DEV.LatPC5	DEV.CompInt	0.359003	0.00181427	0.0275749
DEV.LfAbStom	DEV.CompInt	0.415895	0.000252874	0.00571508
DEV.LfAdStom	DEV.CompInt	0.183543	0.120098	0.428892
DEV.LfStomRatio	DEV.CompInt	0.0226459	0.849175	0.951248
DEV.LftAR	DEV.CompInt	0.0702826	0.554613	0.827393
DEV.LftCirc	DEV.CompInt	-0.311613	0.00728249	0.0771447
DEV.LftRound	DEV.CompInt	-0.083827	0.480749	0.78342
DEV.LftSolid	DEV.CompInt	0.326114	0.00486799	0.0580795
DEV.TermLfSize	DEV.CompInt	-0.39254	0.000592661	0.011407
DEV.TermPC1	DEV.CompInt	0.198568	0.0921619	0.375222
DEV.TermPC3	DEV.CompInt	0.191935	0.103789	0.397613
DEV.TermPC4	DEV.CompInt	-0.268944	0.0214051	0.160015
DEV.TermPC5	DEV.CompInt	0.449309	6.67832e-05	0.00191751
ENZ.aa_cont	DEV.CompInt	-0.0819139	0.481771	0.783508
ENZ.ac_inv	DEV.CompInt	-0.104388	0.369501	0.709779
ENZ.aconi	DEV.CompInt	0.161394	0.16367	0.496279
ENZ.agpa	DEV.CompInt	-0.297696	0.00948901	0.0929165
ENZ.ala_ami	DEV.CompInt	0.0962679	0.40809	0.737537
ENZ.asp_ami	DEV.CompInt	0.0640328	0.582636	0.842242
ENZ.fbp_ald	DEV.CompInt	-0.0948189	0.415215	0.741928
ENZ.fru_kin	DEV.CompInt	0.0751606	0.51874	0.807089
ENZ.fructose_e	DEV.CompInt	-0.0421599	0.717642	0.904769
ENZ.fuma	DEV.CompInt	-0.0108962	0.926077	0.977106
ENZ.g6pdh	DEV.CompInt	-0.00661654	0.954763	0.985721
ENZ.gadph	DEV.CompInt	0.0301299	0.79612	0.933001
ENZ.gapdh_p	DEV.CompInt	-0.154915	0.181479	0.521984
ENZ.gluc_kin	DEV.CompInt	0.147314	0.204117	0.550351
ENZ.glucose_e	DEV.CompInt	0.442488	6.27386e-05	0.0018163
ENZ.gluta_dh	DEV.CompInt	-0.132112	0.255274	0.604998
ENZ.iso_ci_dh	DEV.CompInt	0.117485	0.312142	0.663044
ENZ.mal_dh	DEV.CompInt	0.215448	0.0616066	0.30391
ENZ.pep_car	DEV.CompInt	0.022447	0.847374	0.950797
ENZ.ph_fru_kin	DEV.CompInt	-0.0156664	0.893148	0.966525
ENZ.ph_fru_kin_a	DEV.CompInt	-0.0113465	0.922504	0.975931
ENZ.ph_glu_is_c	DEV.CompInt	-0.0455776	0.695831	0.894994
ENZ.ph_glu_is_t	DEV.CompInt	-0.0239781	0.837102	0.946946
ENZ.ph_glu_mut	DEV.CompInt	-0.135694	0.2425	0.592933
ENZ.ph_gly_kin	DEV.CompInt	0.184279	0.111034	0.412704
ENZ.pro_con	DEV.CompInt	0.0816951	0.482946	0.784233
ENZ.pyr_kin	DEV.CompInt	0.00672591	0.954016	0.98561
ENZ.shik_de	DEV.CompInt	0.1781	0.123746	0.435161
ENZ.starch	DEV.CompInt	-0.118522	0.31117	0.66198
ENZ.suc_p_syn	DEV.CompInt	0.00869446	0.940579	0.98182
ENZ.suc_syn	DEV.CompInt	-0.0588927	0.613317	0.857582
ENZ.succ_co_l	DEV.CompInt	0.00114155	0.992352	0.998098
ENZ.sucrose_e	DEV.CompInt	0.0532604	0.647712	0.873886
ENZ.tr_ph_iso	DEV.CompInt	-0.0488312	0.675293	0.886173
ENZ.udp_glu	DEV.CompInt	-0.0890499	0.444287	0.761649
MET.a_tocopherol	DEV.CompInt	-0.0240328	0.836736	0.946942
MET.aconitate	DEV.CompInt	-0.0405919	0.740525	0.913197
MET.alanine	DEV.CompInt	0.0291729	0.802462	0.934602
MET.arabinose	DEV.CompInt	0.0450648	0.703013	0.898641
MET.arginine	DEV.CompInt	-0.0939403	0.422751	0.747488
MET.asparagine	DEV.CompInt	-0.174272	0.13216	0.44873
MET.aspartate	DEV.CompInt	-0.0334108	0.774479	0.925189
MET.b_alanine	DEV.CompInt	0.0914559	0.432026	0.753178
MET.benzoate	DEV.CompInt	-0.0618208	0.598266	0.849683
MET.citramalate	DEV.CompInt	0.229364	0.0462539	0.255845
MET.citrate	DEV.CompInt	0.189337	0.101401	0.393494
MET.cysteine	DEV.CompInt	0.179459	0.123415	0.434469
MET.dehydroascorbate	DEV.CompInt	0.183677	0.112225	0.414706
MET.erythritol	DEV.CompInt	0.0815038	0.483975	0.785072
MET.fa16_0	DEV.CompInt	0.0532604	0.647712	0.873886
MET.fa18_0	DEV.CompInt	0.0534792	0.646362	0.873173
MET.fa18_2	DEV.CompInt	-0.0752166	0.524174	0.81041
MET.fructose	DEV.CompInt	0.268954	0.018809	0.14759
MET.fructose_6p	DEV.CompInt	0.19434	0.0925259	0.375992
MET.fucose	DEV.CompInt	0.151692	0.196992	0.542019
MET.fumarate	DEV.CompInt	-0.085064	0.468072	0.776262
MET.gaba	DEV.CompInt	0.127683	0.271693	0.622572
MET.galactose	DEV.CompInt	0.105537	0.364229	0.7056
MET.galacturonate	DEV.CompInt	0.0503623	0.665708	0.882136
MET.gluconate	DEV.CompInt	-0.0663295	0.569159	0.834651
MET.glucose	DEV.CompInt	0.295448	0.00956736	0.0935278
MET.glucose_6p	DEV.CompInt	0.179029	0.121765	0.432161
MET.glutamate	DEV.CompInt	-0.00665718	0.954796	0.985721
MET.glutamine	DEV.CompInt	-0.0388449	0.745965	0.915288
MET.glycerate	DEV.CompInt	-0.0517293	0.657195	0.877845
MET.glycerate_3p	DEV.CompInt	0.17289	0.155428	0.484743
MET.glycerol	DEV.CompInt	0.133121	0.258183	0.608364
MET.glycerol_1p	DEV.CompInt	0.251483	0.0284233	0.191628
MET.glycine	DEV.CompInt	-0.0644703	0.580058	0.840905
MET.homoserine	DEV.CompInt	-0.0100342	0.931444	0.978925
MET.inositol	DEV.CompInt	0.182584	0.114416	0.418307
MET.inositol_1p	DEV.CompInt	0.00694463	0.952523	0.985163
MET.isocitrate	DEV.CompInt	0.121258	0.296746	0.648732
MET.isoleucine	DEV.CompInt	-0.122871	0.290318	0.641923
MET.isomaltose	DEV.CompInt	-0.0208663	0.859931	0.953995
MET.l_ascorbate	DEV.CompInt	-0.144467	0.216235	0.564738
MET.leucine	DEV.CompInt	-0.144744	0.212209	0.559607
MET.lysine	DEV.CompInt	-0.0822966	0.479719	0.783085
MET.malate	DEV.CompInt	0.129733	0.264006	0.614483
MET.maleate	DEV.CompInt	-0.159624	0.183621	0.524475
MET.maltitol	DEV.CompInt	0.14067	0.225495	0.574536
MET.maltose	DEV.CompInt	0.144306	0.213608	0.561454
MET.mannitol	DEV.CompInt	-0.00486486	0.966958	0.989334
MET.mannose	DEV.CompInt	0.0312235	0.788888	0.930574
MET.methionine	DEV.CompInt	-0.0555571	0.633592	0.867942
MET.oxoproline_5	DEV.CompInt	-0.094958	0.437674	0.756559
MET.phenylalanine	DEV.CompInt	0.0143267	0.902239	0.96898
MET.phosphate	DEV.CompInt	-0.0436364	0.708191	0.901014
MET.proline	DEV.CompInt	0.161996	0.162084	0.494205
MET.putrescine	DEV.CompInt	-0.0843472	0.468803	0.776895
MET.quinate	DEV.CompInt	0.353301	0.00174458	0.026763
MET.rhamnose	DEV.CompInt	-0.0568968	0.625415	0.863321
MET.ribose	DEV.CompInt	0.091702	0.430783	0.752861
MET.s_me_cysteine	DEV.CompInt	-0.133684	0.252858	0.602824
MET.saccharate	DEV.CompInt	0.0189747	0.870762	0.957395
MET.serine	DEV.CompInt	0.00784689	0.946363	0.983683
MET.shikimate	DEV.CompInt	-0.012541	0.916728	0.974059
MET.sorbitol	DEV.CompInt	0.111437	0.341183	0.686491
MET.succinate	DEV.CompInt	0.0717977	0.53767	0.818178
MET.sucrose	DEV.CompInt	0.0860971	0.459596	0.770437
MET.t4_ho_proline	DEV.CompInt	0.0498272	0.675482	0.886255
MET.threonate	DEV.CompInt	0.0996856	0.39157	0.72651
MET.threonine	DEV.CompInt	-0.0096514	0.934053	0.979802
MET.trehalose	DEV.CompInt	-0.0813124	0.485006	0.785662
MET.tryptophan	DEV.CompInt	0.0144087	0.901682	0.968927
MET.tyrosine	DEV.CompInt	-0.0709501	0.542494	0.820607
MET.uracil	DEV.CompInt	-0.173741	0.136032	0.455327
MET.valine	DEV.CompInt	-0.193794	0.093465	0.378105
MOR.Anther_L_W	DEV.CompInt	0.122987	0.293163	0.644949
MOR.Anther_length	DEV.CompInt	0.0974111	0.405739	0.73537
MOR.Anther_width	DEV.CompInt	-0.0957041	0.414055	0.740991
MOR.BM	DEV.CompInt	0.361223	0.00145263	0.0232271
MOR.BX	DEV.CompInt	0.333087	0.00349984	0.0457794
MOR.BY	DEV.CompInt	0.291977	0.0110292	0.103123
MOR.EA	DEV.CompInt	-0.189707	0.103069	0.396483
MOR.flowers_inf	DEV.CompInt	-0.138494	0.263701	0.614402
MOR.flowers_plant	DEV.CompInt	0.148535	0.230294	0.579485
MOR.FN	DEV.CompInt	0.226145	0.0510649	0.27186
MOR.Fruit_L_Pt	DEV.CompInt	0.163869	0.160072	0.491284
MOR.Fruit_L_W	DEV.CompInt	0.220427	0.0573892	0.29165
MOR.Fruit_length	DEV.CompInt	0.184154	0.113743	0.417447
MOR.Fruit_locule	DEV.CompInt	-0.00318825	0.978342	0.992287
MOR.Fruit_peric_thick	DEV.CompInt	0.156842	0.179009	0.518791
MOR.Fruit_W_Pt	DEV.CompInt	-0.0940541	0.422187	0.74694
MOR.Fruit_width	DEV.CompInt	0.0391181	0.738976	0.912657
MOR.FW	DEV.CompInt	0.039175	0.73861	0.912586
MOR.HI	DEV.CompInt	-0.208649	0.0724263	0.331065
MOR.inf	DEV.CompInt	0.222546	0.0702788	0.32546
MOR.Ovary_L_W	DEV.CompInt	-0.0165861	0.887683	0.964298
MOR.Ovary_length	DEV.CompInt	0.0930299	0.42728	0.750444
MOR.Ovary_width	DEV.CompInt	0.087596	0.454882	0.768311
MOR.PW	DEV.CompInt	0.414367	0.000219148	0.00509451
MOR.RED	DEV.CompInt	0.186686	0.108775	0.407939
MOR.Seed_L_W	DEV.CompInt	-0.122361	0.295645	0.64767
MOR.Seed_Length	DEV.CompInt	-0.0425768	0.720598	0.905674
MOR.Seed_Width	DEV.CompInt	-0.0431579	0.713133	0.903032
MOR.Seed_Wt	DEV.CompInt	0.131892	0.259333	0.60925
MOR.SN_fruit	DEV.CompInt	0.0617354	0.598772	0.84981
MOR.SN_fruit_unit	DEV.CompInt	-0.0028165	0.980867	0.99349
MOR.SN_plant	DEV.CompInt	0.216302	0.0623364	0.306069
MOR.Style_L_W	DEV.CompInt	0.20037	0.0847737	0.358341
MOR.Style_length	DEV.CompInt	0.127795	0.274553	0.624398
MOR.Style_width	DEV.CompInt	-0.108137	0.355761	0.699332
MOR.SW_fruit	DEV.CompInt	0.0982077	0.401892	0.733158
MOR.SW_plant	DEV.CompInt	0.234083	0.0432443	0.246458
MOR.TY	DEV.CompInt	0.222646	0.0548632	0.284353
SED.Adenine_seeds	DEV.CompInt	0.0201932	0.870167	0.957245
SED.Alanine_seeds	DEV.CompInt	-0.142747	0.225024	0.574076
SED.Arginine_seeds	DEV.CompInt	-0.157793	0.179366	0.519209
SED.Asparagine_seeds	DEV.CompInt	-0.0232358	0.844214	0.950187
SED.Aspartate_seeds	DEV.CompInt	0.145057	0.217531	0.566589
SED.Benzoate_seeds	DEV.CompInt	0.116535	0.322773	0.671422
SED.Citrate_seeds	DEV.CompInt	0.0713069	0.546022	0.821819
SED.Erythritol_seeds	DEV.CompInt	0.270522	0.0197456	0.152165
SED.Fructose_seeds	DEV.CompInt	-0.038993	0.741517	0.913468
SED.Fumarate_seeds	DEV.CompInt	0.0829471	0.482304	0.783965
SED.GABA_seeds	DEV.CompInt	0.0556979	0.637398	0.869412
SED.Galactinol_seeds	DEV.CompInt	-0.156201	0.203369	0.54935
SED.Galactonic_acid_1_4_lactone_seeds	DEV.CompInt	-0.0742095	0.529759	0.814246
SED.Glutamate_seeds	DEV.CompInt	-0.00718253	0.95157	0.984968
SED.Glycerate_seeds	DEV.CompInt	0.318475	0.00568565	0.0646625
SED.Glycerol_1P_seeds	DEV.CompInt	0.0607627	0.607058	0.854201
SED.Glycerol_seeds	DEV.CompInt	0.0235616	0.842058	0.949573
SED.Glycine_seeds	DEV.CompInt	-0.0596372	0.613746	0.857752
SED.Glycolate_seeds	DEV.CompInt	-0.0601754	0.623308	0.862304
SED.Isoleucine_seeds	DEV.CompInt	-0.066331	0.574453	0.837818
SED.Lysine_seeds	DEV.CompInt	-0.0513143	0.664148	0.881052
SED.Malate_seeds	DEV.CompInt	0.176127	0.133337	0.450895
SED.Maltotriose_seeds	DEV.CompInt	-0.0081307	0.947533	0.983932
SED.Melezitose_seeds	DEV.CompInt	0.223014	0.0561455	0.287935
SED.Myo_Inositol_seeds	DEV.CompInt	-0.173965	0.138245	0.459329
SED.NA_sugar_seeds	DEV.CompInt	-0.032773	0.781627	0.92733
SED.Nicotinate_seeds	DEV.CompInt	0.0281695	0.818275	0.940638
SED.Nonanoate_seeds	DEV.CompInt	0.196053	0.109086	0.408613
SED.Octadecanoate_seeds	DEV.CompInt	-0.122814	0.297203	0.649146
SED.Phenylalanine_seeds	DEV.CompInt	0.095535	0.418121	0.74405
SED.Phosphate_seeds	DEV.CompInt	0.0874787	0.458614	0.769766
SED.Proline_seeds	DEV.CompInt	-0.0490633	0.678052	0.887296
SED.Putrescine_seeds	DEV.CompInt	-0.0172529	0.884001	0.962289
SED.Raffinose_seeds	DEV.CompInt	0.11997	0.308613	0.659626
SED.Salicylate_seeds	DEV.CompInt	0.0767568	0.515689	0.805414
SED.Serine_seeds	DEV.CompInt	-0.0453017	0.701525	0.898134
SED.Succinate_seeds	DEV.CompInt	0.00320647	0.979296	0.992894
SED.Threonine_seeds	DEV.CompInt	-0.128767	0.274219	0.624114
SED.Trehalose_alpha_alpha_seeds	DEV.CompInt	0.200767	0.0981031	0.387617
SED.Tyrosine_seeds	DEV.CompInt	-0.0509293	0.666518	0.882778
SED.Uracil_seeds	DEV.CompInt	0.0327137	0.791138	0.931115
SED.Urea_seeds	DEV.CompInt	0.0923658	0.433798	0.754409
SED.Valine_seeds	DEV.CompInt	-0.0623621	0.59761	0.849615
SED.X4_Hydroxy_Benzoate_seeds	DEV.CompInt	0.139726	0.235093	0.584931
WAX.anteiso_ACL	DEV.CompInt	0.18915	0.111541	0.413707
WAX.anteiso_CPI	DEV.CompInt	0.0167096	0.889202	0.965313
WAX.eps_iC31	DEV.CompInt	-0.00147919	0.990161	0.997239
WAX.eps_nC31	DEV.CompInt	-0.0757283	0.527231	0.812237
WAX.eps_iC33	DEV.CompInt	0.071548	0.550343	0.824586
WAX.eps_nC33	DEV.CompInt	-0.0578862	0.629103	0.865141
WAX.n31.i31	DEV.CompInt	0.132843	0.265956	0.616868
WAX.n33.i33	DEV.CompInt	-0.151846	0.202909	0.548827
WAX.iso_ACL	DEV.CompInt	-0.0782396	0.513583	0.804057
WAX.iso_CPI	DEV.CompInt	0.0651489	0.586641	0.84435
WAX.mindex	DEV.CompInt	0.131561	0.270638	0.621575
WAX.nalk_ACL	DEV.CompInt	-0.0214876	0.857813	0.953672
WAX.nalk_CPI	DEV.CompInt	-0.232909	0.0489672	0.265134
WAX.pct_iso	DEV.CompInt	0.202553	0.0879377	0.36531
WAX.pct_anteiso	DEV.CompInt	0.0687182	0.566261	0.833344
DEV.CompAll	DEV.CompPri	0.827642	0	0
DEV.CompInt	DEV.CompPri	0.762816	1.33227e-15	3.84105e-13
DEV.CompPri	DEV.CompPri	1	NA	NA
DEV.CompRachis	DEV.CompPri	0.825646	0	0
DEV.CompSec	DEV.CompPri	0.76257	1.33227e-15	3.84105e-13
DEV.CotPaveAR	DEV.CompPri	-0.135382	0.253451	0.603544
DEV.CotPaveArea	DEV.CompPri	0.141491	0.232458	0.582051
DEV.CotPaveCirc	DEV.CompPri	-0.0480995	0.686137	0.89126
DEV.CotPaveCnt	DEV.CompPri	-0.1476	0.212704	0.56031
DEV.CotPaveRound	DEV.CompPri	0.117025	0.324136	0.6723
DEV.CotPaveSolid	DEV.CompPri	0.00404171	0.972928	0.990948
DEV.CotStom	DEV.CompPri	-0.193359	0.101202	0.393284
DEV.CotStomInd	DEV.CompPri	-0.0409108	0.731107	0.910511
DEV.FlowTime	DEV.CompPri	0.314181	0.00807953	0.0831479
DEV.LatLfSize	DEV.CompPri	-0.2587	0.0271082	0.186401
DEV.LatPC1	DEV.CompPri	0.170386	0.149525	0.47639
DEV.LatPC2	DEV.CompPri	-0.238893	0.0418059	0.241559
DEV.LatPC3	DEV.CompPri	0.10021	0.398926	0.731373
DEV.LatPC4	DEV.CompPri	-0.203783	0.0837619	0.356543
DEV.LatPC5	DEV.CompPri	0.203628	0.0840014	0.357016
DEV.LfAbStom	DEV.CompPri	0.376743	0.00101879	0.0175765
DEV.LfAdStom	DEV.CompPri	0.145625	0.218955	0.567411
DEV.LfStomRatio	DEV.CompPri	0.0651919	0.583713	0.842746
DEV.LftAR	DEV.CompPri	0.0778724	0.512562	0.803402
DEV.LftCirc	DEV.CompPri	-0.332963	0.00399755	0.0505667
DEV.LftRound	DEV.CompPri	-0.0927434	0.435151	0.755466
DEV.LftSolid	DEV.CompPri	0.312755	0.00706008	0.0754583
DEV.TermLfSize	DEV.CompPri	-0.325034	0.00501955	0.0593309
DEV.TermPC1	DEV.CompPri	0.27243	0.0197133	0.15203
DEV.TermPC3	DEV.CompPri	0.270671	0.0205519	0.156
DEV.TermPC4	DEV.CompPri	-0.24059	0.0403309	0.236555
DEV.TermPC5	DEV.CompPri	0.356535	0.00196094	0.0292634
ENZ.aa_cont	DEV.CompPri	-0.179604	0.120554	0.429645
ENZ.ac_inv	DEV.CompPri	-0.0911552	0.433548	0.754065
ENZ.aconi	DEV.CompPri	0.0971702	0.40369	0.733971
ENZ.agpa	DEV.CompPri	-0.236671	0.0409188	0.238652
ENZ.ala_ami	DEV.CompPri	0.0919207	0.42968	0.752327
ENZ.asp_ami	DEV.CompPri	-0.00303486	0.979242	0.992875
ENZ.fbp_ald	DEV.CompPri	-0.18622	0.107257	0.404696
ENZ.fru_kin	DEV.CompPri	-0.015229	0.896115	0.96726
ENZ.fructose_e	DEV.CompPri	0.00702666	0.951963	0.985047
ENZ.fuma	DEV.CompPri	-0.0974964	0.405326	0.735106
ENZ.g6pdh	DEV.CompPri	-0.0915106	0.43175	0.753102
ENZ.gadph	DEV.CompPri	-0.125332	0.280692	0.631218
ENZ.gapdh_p	DEV.CompPri	-0.281094	0.0139046	0.120801
ENZ.gluc_kin	DEV.CompPri	0.0100342	0.931444	0.978925
ENZ.glucose_e	DEV.CompPri	0.439891	7.00717e-05	0.00199352
ENZ.gluta_dh	DEV.CompPri	-0.108872	0.349179	0.693548
ENZ.iso_ci_dh	DEV.CompPri	-0.00467532	0.968027	0.989647
ENZ.mal_dh	DEV.CompPri	0.188216	0.103478	0.396931
ENZ.pep_car	DEV.CompPri	-0.0664388	0.568521	0.834212
ENZ.ph_fru_kin	DEV.CompPri	-0.136022	0.241352	0.591897
ENZ.ph_fru_kin_a	DEV.CompPri	-0.127601	0.272004	0.622645
ENZ.ph_glu_is_c	DEV.CompPri	-0.0579631	0.618939	0.859482
ENZ.ph_glu_is_t	DEV.CompPri	-0.168886	0.144727	0.468834
ENZ.ph_glu_mut	DEV.CompPri	-0.144689	0.212383	0.559909
ENZ.ph_gly_kin	DEV.CompPri	0.0514559	0.658894	0.878614
ENZ.pro_con	DEV.CompPri	-0.0176897	0.879446	0.96059
ENZ.pyr_kin	DEV.CompPri	-0.170608	0.140615	0.46263
ENZ.shik_de	DEV.CompPri	-0.00120301	0.991771	0.997837
ENZ.starch	DEV.CompPri	-0.258299	0.0252547	0.178667
ENZ.suc_p_syn	DEV.CompPri	-0.0891866	0.443585	0.761155
ENZ.suc_syn	DEV.CompPri	-0.0689542	0.553937	0.827002
ENZ.succ_co_l	DEV.CompPri	0.0684623	0.564938	0.832581
ENZ.sucrose_e	DEV.CompPri	0.127054	0.274081	0.624114
ENZ.tr_ph_iso	DEV.CompPri	-0.133917	0.248782	0.598489
ENZ.udp_glu	DEV.CompPri	-0.0733561	0.528855	0.813832
MET.a_tocopherol	DEV.CompPri	-0.0407929	0.726432	0.908397
MET.aconitate	DEV.CompPri	-0.14293	0.241356	0.591897
MET.alanine	DEV.CompPri	0.10067	0.386888	0.722325
MET.arabinose	DEV.CompPri	-0.102792	0.383479	0.720821
MET.arginine	DEV.CompPri	-0.280569	0.0147615	0.125516
MET.asparagine	DEV.CompPri	-0.193548	0.0938901	0.379112
MET.aspartate	DEV.CompPri	-0.205386	0.0750975	0.337199
MET.b_alanine	DEV.CompPri	-0.00754614	0.948416	0.984348
MET.benzoate	DEV.CompPri	-0.217724	0.0605929	0.301477
MET.citramalate	DEV.CompPri	0.227697	0.0479082	0.261221
MET.citrate	DEV.CompPri	0.131975	0.25577	0.605662
MET.cysteine	DEV.CompPri	0.257354	0.0258134	0.181063
MET.dehydroascorbate	DEV.CompPri	0.148763	0.199653	0.54537
MET.erythritol	DEV.CompPri	0.140643	0.225586	0.574536
MET.fa16_0	DEV.CompPri	-0.0130417	0.91097	0.972039
MET.fa18_0	DEV.CompPri	-0.0302392	0.795396	0.932651
MET.fa18_2	DEV.CompPri	-0.15729	0.180775	0.520978
MET.fructose	DEV.CompPri	0.250882	0.0288172	0.193181
MET.fructose_6p	DEV.CompPri	0.135694	0.2425	0.592933
MET.fucose	DEV.CompPri	-0.0296631	0.801905	0.934513
MET.fumarate	DEV.CompPri	-0.144751	0.215322	0.563407
MET.gaba	DEV.CompPri	0.0171155	0.883331	0.962093
MET.galactose	DEV.CompPri	0.0182912	0.875379	0.959237
MET.galacturonate	DEV.CompPri	0.0336022	0.773222	0.925015
MET.gluconate	DEV.CompPri	-0.0839645	0.47083	0.778114
MET.glucose	DEV.CompPri	0.302119	0.00799095	0.0824935
MET.glucose_6p	DEV.CompPri	0.11218	0.334641	0.68058
MET.glutamate	DEV.CompPri	-0.0566999	0.62897	0.865128
MET.glutamine	DEV.CompPri	-0.0461123	0.70051	0.897467
MET.glycerate	DEV.CompPri	-0.133479	0.250345	0.600088
MET.glycerate_3p	DEV.CompPri	0.0426014	0.728166	0.908948
MET.glycerol	DEV.CompPri	0.0931063	0.430106	0.752665
MET.glycerol_1p	DEV.CompPri	0.109173	0.347842	0.69276
MET.glycine	DEV.CompPri	-0.0704033	0.545618	0.821734
MET.homoserine	DEV.CompPri	-0.0441285	0.70505	0.899612
MET.inositol	DEV.CompPri	0.180943	0.117765	0.424491
MET.inositol_1p	DEV.CompPri	-0.107642	0.354685	0.698524
MET.isocitrate	DEV.CompPri	0.128038	0.27035	0.621507
MET.isoleucine	DEV.CompPri	-0.164019	0.156835	0.486852
MET.isomaltose	DEV.CompPri	-0.109456	0.353233	0.697253
MET.l_ascorbate	DEV.CompPri	-0.145889	0.211698	0.559226
MET.leucine	DEV.CompPri	-0.213315	0.0642883	0.311808
MET.lysine	DEV.CompPri	-0.179357	0.121072	0.43072
MET.malate	DEV.CompPri	-0.0220916	0.849763	0.9513
MET.maleate	DEV.CompPri	-0.247753	0.0372377	0.225653
MET.maltitol	DEV.CompPri	0.0250444	0.829964	0.944219
MET.maltose	DEV.CompPri	0.13944	0.22962	0.578901
MET.mannitol	DEV.CompPri	-0.0755903	0.519213	0.807401
MET.mannose	DEV.CompPri	-0.0259193	0.824118	0.942359
MET.methionine	DEV.CompPri	-0.112973	0.331214	0.678612
MET.oxoproline_5	DEV.CompPri	-0.168688	0.165874	0.499713
MET.phenylalanine	DEV.CompPri	-0.0345044	0.767302	0.922763
MET.phosphate	DEV.CompPri	-0.063568	0.585382	0.843768
MET.proline	DEV.CompPri	0.0327546	0.778794	0.926011
MET.putrescine	DEV.CompPri	0.0130964	0.910598	0.971939
MET.quinate	DEV.CompPri	0.161887	0.162372	0.494575
MET.rhamnose	DEV.CompPri	-0.0361996	0.756217	0.918217
MET.ribose	DEV.CompPri	0.129624	0.264412	0.614879
MET.s_me_cysteine	DEV.CompPri	-0.0466572	0.691004	0.893459
MET.saccharate	DEV.CompPri	0.074231	0.523938	0.81028
MET.serine	DEV.CompPri	0.0136432	0.906882	0.970742
MET.shikimate	DEV.CompPri	0.142774	0.231533	0.580942
MET.sorbitol	DEV.CompPri	0.0890754	0.447272	0.763355
MET.succinate	DEV.CompPri	-0.0609706	0.60083	0.850861
MET.sucrose	DEV.CompPri	0.03311	0.776456	0.925847
MET.t4_ho_proline	DEV.CompPri	-0.0517092	0.663948	0.880958
MET.threonate	DEV.CompPri	-0.0594122	0.610185	0.855796
MET.threonine	DEV.CompPri	-0.0556664	0.632923	0.867621
MET.trehalose	DEV.CompPri	-0.0587833	0.613977	0.857752
MET.tryptophan	DEV.CompPri	-0.0195215	0.867071	0.956171
MET.tyrosine	DEV.CompPri	-0.136869	0.238405	0.588042
MET.uracil	DEV.CompPri	-0.239602	0.0384128	0.229538
MET.valine	DEV.CompPri	-0.169378	0.143543	0.466946
MOR.Anther_L_W	DEV.CompPri	0.136245	0.2438	0.593965
MOR.Anther_length	DEV.CompPri	0.0809104	0.490151	0.789652
MOR.Anther_width	DEV.CompPri	-0.095505	0.415032	0.741732
MOR.BM	DEV.CompPri	0.315733	0.00579145	0.0656521
MOR.BX	DEV.CompPri	0.247909	0.0319934	0.206874
MOR.BY	DEV.CompPri	0.31872	0.0053213	0.0617492
MOR.EA	DEV.CompPri	-0.0816239	0.48632	0.786663
MOR.flowers_inf	DEV.CompPri	-0.200254	0.104204	0.398442
MOR.flowers_plant	DEV.CompPri	0.132094	0.286622	0.637986
MOR.FN	DEV.CompPri	0.226117	0.0510949	0.271916
MOR.Fruit_L_Pt	DEV.CompPri	-0.0384068	0.743557	0.914645
MOR.Fruit_L_W	DEV.CompPri	-0.0131152	0.911079	0.972044
MOR.Fruit_length	DEV.CompPri	0.130043	0.266131	0.616979
MOR.Fruit_locule	DEV.CompPri	0.0913206	0.435858	0.75579
MOR.Fruit_peric_thick	DEV.CompPri	0.299659	0.00900545	0.0896569
MOR.Fruit_W_Pt	DEV.CompPri	0.0440967	0.707172	0.900565
MOR.Fruit_width	DEV.CompPri	0.246401	0.0330866	0.210478
MOR.FW	DEV.CompPri	0.174282	0.134799	0.45348
MOR.HI	DEV.CompPri	-0.0386913	0.741723	0.913468
MOR.inf	DEV.CompPri	0.22087	0.0724743	0.331125
MOR.Ovary_L_W	DEV.CompPri	-0.149018	0.201955	0.547806
MOR.Ovary_length	DEV.CompPri	0.0878236	0.453707	0.767364
MOR.Ovary_width	DEV.CompPri	0.147767	0.205813	0.55229
MOR.PW	DEV.CompPri	0.287084	0.0125154	0.112614
MOR.RED	DEV.CompPri	0.240085	0.0380117	0.228168
MOR.Seed_L_W	DEV.CompPri	0.106316	0.363966	0.705213
MOR.Seed_Length	DEV.CompPri	0.15556	0.188786	0.531681
MOR.Seed_Width	DEV.CompPri	0.0875676	0.455029	0.768315
MOR.Seed_Wt	DEV.CompPri	0.274339	0.0172269	0.139199
MOR.SN_fruit	DEV.CompPri	0.239772	0.0382708	0.229138
MOR.SN_fruit_unit	DEV.CompPri	0.13138	0.261204	0.611641
MOR.SN_plant	DEV.CompPri	0.284523	0.0133601	0.117892
MOR.Style_L_W	DEV.CompPri	0.211522	0.0684945	0.321914
MOR.Style_length	DEV.CompPri	0.171152	0.142054	0.464374
MOR.Style_width	DEV.CompPri	-0.151835	0.193465	0.537335
MOR.SW_fruit	DEV.CompPri	0.273684	0.0175052	0.140797
MOR.SW_plant	DEV.CompPri	0.314538	0.00598955	0.0672433
MOR.TY	DEV.CompPri	0.241593	0.0367836	0.224165
SED.Adenine_seeds	DEV.CompPri	-0.141543	0.249584	0.599309
SED.Alanine_seeds	DEV.CompPri	0.00907812	0.938811	0.981352
SED.Arginine_seeds	DEV.CompPri	-0.113514	0.335561	0.68115
SED.Asparagine_seeds	DEV.CompPri	-0.0735876	0.533224	0.816253
SED.Aspartate_seeds	DEV.CompPri	0.0769345	0.514714	0.804881
SED.Benzoate_seeds	DEV.CompPri	0.0405628	0.731497	0.910511
SED.Citrate_seeds	DEV.CompPri	0.137682	0.242079	0.592647
SED.Erythritol_seeds	DEV.CompPri	0.145413	0.216394	0.564842
SED.Fructose_seeds	DEV.CompPri	0.0154757	0.895879	0.96726
SED.Fumarate_seeds	DEV.CompPri	-0.0456275	0.69948	0.896831
SED.GABA_seeds	DEV.CompPri	-0.0574454	0.626859	0.864094
SED.Galactinol_seeds	DEV.CompPri	-0.0274841	0.823941	0.942359
SED.Galactonic_acid_1_4_lactone_seeds	DEV.CompPri	-0.00377638	0.974526	0.991119
SED.Glutamate_seeds	DEV.CompPri	-0.0484709	0.681729	0.88907
SED.Glycerate_seeds	DEV.CompPri	0.119082	0.312236	0.663121
SED.Glycerol_1P_seeds	DEV.CompPri	0.0528545	0.654699	0.876935
SED.Glycerol_seeds	DEV.CompPri	0.0386672	0.743602	0.914645
SED.Glycine_seeds	DEV.CompPri	-0.0482932	0.682833	0.889971
SED.Glycolate_seeds	DEV.CompPri	-0.155828	0.201045	0.5472
SED.Isoleucine_seeds	DEV.CompPri	-0.0224658	0.849316	0.951248
SED.Lysine_seeds	DEV.CompPri	-0.017786	0.880443	0.961026
SED.Malate_seeds	DEV.CompPri	0.295846	0.0104913	0.0996264
SED.Maltotriose_seeds	DEV.CompPri	-0.0295835	0.810732	0.937576
SED.Melezitose_seeds	DEV.CompPri	0.254498	0.0286571	0.192465
SED.Myo_Inositol_seeds	DEV.CompPri	-0.19458	0.0966609	0.3847
SED.NA_sugar_seeds	DEV.CompPri	-0.00356905	0.975924	0.991491
SED.Nicotinate_seeds	DEV.CompPri	0.0766898	0.531106	0.814865
SED.Nonanoate_seeds	DEV.CompPri	0.111196	0.366659	0.707218
SED.Octadecanoate_seeds	DEV.CompPri	-0.0460718	0.696696	0.895605
SED.Phenylalanine_seeds	DEV.CompPri	-0.0281229	0.811997	0.938289
SED.Phosphate_seeds	DEV.CompPri	-0.046605	0.69336	0.894277
SED.Proline_seeds	DEV.CompPri	-0.120207	0.307651	0.659121
SED.Putrescine_seeds	DEV.CompPri	-0.00582007	0.960749	0.987619
SED.Raffinose_seeds	DEV.CompPri	0.0793632	0.50149	0.796792
SED.Salicylate_seeds	DEV.CompPri	-0.0426657	0.718144	0.905025
SED.Serine_seeds	DEV.CompPri	0.0297519	0.801324	0.934318
SED.Succinate_seeds	DEV.CompPri	-0.248922	0.0406634	0.237757
SED.Threonine_seeds	DEV.CompPri	-0.0863828	0.464283	0.774118
SED.Trehalose_alpha_alpha_seeds	DEV.CompPri	0.280818	0.0194245	0.150771
SED.Tyrosine_seeds	DEV.CompPri	-0.0160977	0.891719	0.965865
SED.Uracil_seeds	DEV.CompPri	-0.211704	0.0830797	0.354773
SED.Urea_seeds	DEV.CompPri	0.167419	0.153937	0.482779
SED.Valine_seeds	DEV.CompPri	0.00543502	0.963344	0.988607
SED.X4_Hydroxy_Benzoate_seeds	DEV.CompPri	-0.0900259	0.445584	0.762542
WAX.anteiso_ACL	DEV.CompPri	0.0877592	0.463531	0.773623
WAX.anteiso_CPI	DEV.CompPri	0.0427469	0.721441	0.906182
WAX.eps_iC31	DEV.CompPri	0.0184256	0.877907	0.960045
WAX.eps_nC31	DEV.CompPri	-0.0856004	0.474643	0.780311
WAX.eps_iC33	DEV.CompPri	0.0898129	0.453093	0.767067
WAX.eps_nC33	DEV.CompPri	-0.0793202	0.507767	0.800824
WAX.n31.i31	DEV.CompPri	0.14708	0.217617	0.566602
WAX.n33.i33	DEV.CompPri	-0.18201	0.125971	0.439272
WAX.iso_ACL	DEV.CompPri	-0.0530233	0.658232	0.878257
WAX.iso_CPI	DEV.CompPri	-0.0164641	0.89082	0.965865
WAX.mindex	DEV.CompPri	0.177114	0.136657	0.456531
WAX.nalk_ACL	DEV.CompPri	-0.103099	0.388792	0.724219
WAX.nalk_CPI	DEV.CompPri	-0.236157	0.045811	0.254651
WAX.pct_iso	DEV.CompPri	0.179947	0.130392	0.446061
WAX.pct_anteiso	DEV.CompPri	0.120812	0.31207	0.663044
DEV.CompAll	DEV.CompRachis	0.918524	0	0
DEV.CompInt	DEV.CompRachis	0.991962	0	0
DEV.CompPri	DEV.CompRachis	0.825646	0	0
DEV.CompRachis	DEV.CompRachis	1	NA	NA
DEV.CompSec	DEV.CompRachis	0.731811	5.9508e-14	1.45982e-11
DEV.CotPaveAR	DEV.CompRachis	0.0239417	0.840654	0.94893
DEV.CotPaveArea	DEV.CompRachis	0.199803	0.0901163	0.370125
DEV.CotPaveCirc	DEV.CompRachis	-0.145995	0.217773	0.566693
DEV.CotPaveCnt	DEV.CompRachis	-0.208349	0.0769146	0.341278
DEV.CotPaveRound	DEV.CompRachis	-0.0360052	0.762334	0.92037
DEV.CotPaveSolid	DEV.CompRachis	0.0840429	0.479615	0.783053
DEV.CotStom	DEV.CompRachis	-0.14569	0.218747	0.567063
DEV.CotStomInd	DEV.CompRachis	0.0516784	0.664136	0.881052
DEV.FlowTime	DEV.CompRachis	0.346339	0.0033142	0.0437301
DEV.LatLfSize	DEV.CompRachis	-0.334136	0.0038633	0.0492438
DEV.LatPC1	DEV.CompRachis	0.23456	0.0457761	0.254558
DEV.LatPC2	DEV.CompRachis	-0.258299	0.0273554	0.187505
DEV.LatPC3	DEV.CompRachis	0.132667	0.263184	0.613667
DEV.LatPC4	DEV.CompRachis	-0.217759	0.0642132	0.311602
DEV.LatPC5	DEV.CompRachis	0.353634	0.00214683	0.0313515
DEV.LfAbStom	DEV.CompRachis	0.421171	0.0002068	0.00488873
DEV.LfAdStom	DEV.CompRachis	0.183481	0.120225	0.429114
DEV.LfStomRatio	DEV.CompRachis	0.0315624	0.790947	0.931115
DEV.LftAR	DEV.CompRachis	0.0725657	0.541792	0.820552
DEV.LftCirc	DEV.CompRachis	-0.3296	0.00440595	0.0541851
DEV.LftRound	DEV.CompRachis	-0.0866346	0.466123	0.775206
DEV.LftSolid	DEV.CompRachis	0.335339	0.00372969	0.0480223
DEV.TermLfSize	DEV.CompRachis	-0.388622	0.000679611	0.0127728
DEV.TermPC1	DEV.CompRachis	0.21924	0.0623783	0.306155
DEV.TermPC3	DEV.CompRachis	0.20298	0.0850132	0.358877
DEV.TermPC4	DEV.CompRachis	-0.271751	0.0200334	0.153645
DEV.TermPC5	DEV.CompRachis	0.446409	7.53823e-05	0.00210183
ENZ.aa_cont	DEV.CompRachis	-0.0916473	0.431059	0.752914
ENZ.ac_inv	DEV.CompRachis	-0.10026	0.388835	0.724219
ENZ.aconi	DEV.CompRachis	0.159617	0.16842	0.502673
ENZ.agpa	DEV.CompRachis	-0.285235	0.0131206	0.116486
ENZ.ala_ami	DEV.CompRachis	0.101107	0.384817	0.721203
ENZ.asp_ami	DEV.CompRachis	0.0617088	0.596421	0.849046
ENZ.fbp_ald	DEV.CompRachis	-0.108243	0.351987	0.696206
ENZ.fru_kin	DEV.CompRachis	0.059002	0.612657	0.857159
ENZ.fructose_e	DEV.CompRachis	-0.026056	0.823205	0.942221
ENZ.fuma	DEV.CompRachis	-0.0295875	0.801051	0.934303
ENZ.g6pdh	DEV.CompRachis	-0.0118387	0.919153	0.974636
ENZ.gadph	DEV.CompRachis	0.0194668	0.86744	0.956258
ENZ.gapdh_p	DEV.CompRachis	-0.176869	0.126405	0.440119
ENZ.gluc_kin	DEV.CompRachis	0.133835	0.249075	0.598884
ENZ.glucose_e	DEV.CompRachis	0.455448	3.5654e-05	0.00113565
ENZ.gluta_dh	DEV.CompRachis	-0.128859	0.267267	0.61826
ENZ.iso_ci_dh	DEV.CompRachis	0.0927956	0.425283	0.749059
ENZ.mal_dh	DEV.CompRachis	0.227341	0.048267	0.262665
ENZ.pep_car	DEV.CompRachis	0.0164593	0.887775	0.964325
ENZ.ph_fru_kin	DEV.CompRachis	-0.0208612	0.85804	0.953686
ENZ.ph_fru_kin_a	DEV.CompRachis	-0.0268216	0.818098	0.940638
ENZ.ph_glu_is_c	DEV.CompRachis	-0.036473	0.754434	0.917871
ENZ.ph_glu_is_t	DEV.CompRachis	-0.0432262	0.710812	0.902266
ENZ.ph_glu_mut	DEV.CompRachis	-0.127929	0.270763	0.62179
ENZ.ph_gly_kin	DEV.CompRachis	0.163336	0.158594	0.489309
ENZ.pro_con	DEV.CompRachis	0.0721804	0.535498	0.816821
ENZ.pyr_kin	DEV.CompRachis	-0.0118387	0.919153	0.974636
ENZ.shik_de	DEV.CompRachis	0.16	0.167389	0.501285
ENZ.starch	DEV.CompRachis	-0.12814	0.273251	0.62386
ENZ.suc_p_syn	DEV.CompRachis	0.00390977	0.97326	0.991008
ENZ.suc_syn	DEV.CompRachis	-0.0531511	0.648388	0.874405
ENZ.succ_co_l	DEV.CompRachis	0.00740466	0.950424	0.984705
ENZ.sucrose_e	DEV.CompRachis	0.0647984	0.578128	0.839896
ENZ.tr_ph_iso	DEV.CompRachis	-0.0582912	0.616952	0.85882
ENZ.udp_glu	DEV.CompRachis	-0.0757348	0.515542	0.805308
MET.a_tocopherol	DEV.CompRachis	-0.0291183	0.802825	0.934665
MET.aconitate	DEV.CompRachis	-0.0411399	0.737148	0.91225
MET.alanine	DEV.CompRachis	0.0545181	0.639964	0.871098
MET.arabinose	DEV.CompRachis	0.00504998	0.965939	0.988996
MET.arginine	DEV.CompRachis	-0.129218	0.269202	0.620444
MET.asparagine	DEV.CompRachis	-0.17974	0.120267	0.429114
MET.aspartate	DEV.CompRachis	-0.0537526	0.644676	0.872121
MET.b_alanine	DEV.CompRachis	0.0802461	0.490768	0.789782
MET.benzoate	DEV.CompRachis	-0.0962162	0.41155	0.739277
MET.citramalate	DEV.CompRachis	0.230294	0.0453525	0.253384
MET.citrate	DEV.CompRachis	0.192071	0.0964724	0.384378
MET.cysteine	DEV.CompRachis	0.200711	0.0842335	0.357285
MET.dehydroascorbate	DEV.CompRachis	0.183322	0.112934	0.415956
MET.erythritol	DEV.CompRachis	0.0969241	0.404887	0.73485
MET.fa16_0	DEV.CompRachis	0.0498701	0.668783	0.883409
MET.fa18_0	DEV.CompRachis	0.0450581	0.699131	0.896753
MET.fa18_2	DEV.CompRachis	-0.0902332	0.444532	0.761752
MET.fructose	DEV.CompRachis	0.275325	0.0160768	0.13272
MET.fructose_6p	DEV.CompRachis	0.192536	0.0956535	0.38297
MET.fucose	DEV.CompRachis	0.117068	0.320549	0.670302
MET.fumarate	DEV.CompRachis	-0.102304	0.382447	0.71965
MET.gaba	DEV.CompRachis	0.118578	0.307627	0.659121
MET.galactose	DEV.CompRachis	0.0883664	0.447805	0.763617
MET.galacturonate	DEV.CompRachis	0.0561859	0.629749	0.865319
MET.gluconate	DEV.CompRachis	-0.0681066	0.558831	0.829438
MET.glucose	DEV.CompRachis	0.304908	0.00740266	0.0780629
MET.glucose_6p	DEV.CompRachis	0.177006	0.126107	0.439465
MET.glutamate	DEV.CompRachis	-0.0107824	0.926847	0.977513
MET.glutamine	DEV.CompRachis	-0.0380089	0.751254	0.917042
MET.glycerate	DEV.CompRachis	-0.0819686	0.481477	0.783487
MET.glycerate_3p	DEV.CompRachis	0.158568	0.193138	0.53691
MET.glycerol	DEV.CompRachis	0.126694	0.282085	0.632825
MET.glycerol_1p	DEV.CompRachis	0.23691	0.0393468	0.233215
MET.glycine	DEV.CompRachis	-0.0699111	0.548436	0.823459
MET.homoserine	DEV.CompRachis	-0.0171155	0.883331	0.962093
MET.inositol	DEV.CompRachis	0.198004	0.0864237	0.362086
MET.inositol_1p	DEV.CompRachis	-0.0177717	0.878892	0.960302
MET.isocitrate	DEV.CompRachis	0.120711	0.298946	0.650558
MET.isoleucine	DEV.CompRachis	-0.135913	0.241735	0.592247
MET.isomaltose	DEV.CompRachis	-0.028508	0.809471	0.937312
MET.l_ascorbate	DEV.CompRachis	-0.148848	0.202478	0.548215
MET.leucine	DEV.CompRachis	-0.169487	0.143281	0.46639
MET.lysine	DEV.CompRachis	-0.111989	0.335471	0.681123
MET.malate	DEV.CompRachis	0.0956664	0.411039	0.738973
MET.maleate	DEV.CompRachis	-0.169584	0.157408	0.487772
MET.maltitol	DEV.CompRachis	0.136405	0.240018	0.590305
MET.maltose	DEV.CompRachis	0.145974	0.208307	0.554706
MET.mannitol	DEV.CompRachis	-0.0101849	0.93089	0.978887
MET.mannose	DEV.CompRachis	0.0206425	0.859513	0.953938
MET.methionine	DEV.CompRachis	-0.0577717	0.620099	0.860075
MET.oxoproline_5	DEV.CompRachis	-0.105809	0.386878	0.722325
MET.phenylalanine	DEV.CompRachis	0.00546822	0.962608	0.988372
MET.phosphate	DEV.CompRachis	-0.0491046	0.673577	0.885525
MET.proline	DEV.CompRachis	0.158059	0.172669	0.509211
MET.putrescine	DEV.CompRachis	-0.0677512	0.560889	0.830685
MET.quinate	DEV.CompRachis	0.326179	0.00403353	0.0509224
MET.rhamnose	DEV.CompRachis	-0.0503349	0.665879	0.882207
MET.ribose	DEV.CompRachis	0.110403	0.342403	0.687707
MET.s_me_cysteine	DEV.CompRachis	-0.123215	0.292264	0.644041
MET.saccharate	DEV.CompRachis	0.0325632	0.780054	0.926564
MET.serine	DEV.CompRachis	0.0111825	0.923621	0.976353
MET.shikimate	DEV.CompRachis	0.0114155	0.924178	0.976521
MET.sorbitol	DEV.CompRachis	0.110526	0.345167	0.690432
MET.succinate	DEV.CompRachis	0.0512372	0.660255	0.879227
MET.sucrose	DEV.CompRachis	0.0848941	0.465915	0.774983
MET.t4_ho_proline	DEV.CompRachis	0.0410959	0.729937	0.909928
MET.threonate	DEV.CompRachis	0.0710321	0.542026	0.820565
MET.threonine	DEV.CompRachis	-0.0114012	0.922131	0.975758
MET.trehalose	DEV.CompRachis	-0.0810116	0.486627	0.786801
MET.tryptophan	DEV.CompRachis	0.000273411	0.99813	0.999605
MET.tyrosine	DEV.CompRachis	-0.0866165	0.456882	0.769558
MET.uracil	DEV.CompRachis	-0.180512	0.121193	0.430988
MET.valine	DEV.CompRachis	-0.1892	0.101652	0.394069
MOR.Anther_L_W	DEV.CompRachis	0.124125	0.288685	0.640337
MOR.Anther_length	DEV.CompRachis	0.099431	0.396026	0.729451
MOR.Anther_width	DEV.CompRachis	-0.0940541	0.422187	0.74694
MOR.BM	DEV.CompRachis	0.36697	0.00120179	0.0200055
MOR.BX	DEV.CompRachis	0.327198	0.00416556	0.0520063
MOR.BY	DEV.CompRachis	0.304637	0.00787441	0.0815916
MOR.EA	DEV.CompRachis	-0.182651	0.116773	0.423016
MOR.flowers_inf	DEV.CompRachis	-0.156605	0.205668	0.552147
MOR.flowers_plant	DEV.CompRachis	0.144505	0.243332	0.593575
MOR.FN	DEV.CompRachis	0.233599	0.0436907	0.247891
MOR.Fruit_L_Pt	DEV.CompRachis	0.120626	0.302599	0.65398
MOR.Fruit_L_W	DEV.CompRachis	0.176984	0.128761	0.443832
MOR.Fruit_length	DEV.CompRachis	0.166913	0.152346	0.48049
MOR.Fruit_locule	DEV.CompRachis	0.00382875	0.973993	0.991008
MOR.Fruit_peric_thick	DEV.CompRachis	0.183841	0.114369	0.418307
MOR.Fruit_W_Pt	DEV.CompRachis	-0.0736273	0.530152	0.81427
MOR.Fruit_width	DEV.CompRachis	0.0750498	0.522213	0.808919
MOR.FW	DEV.CompRachis	0.0598009	0.610298	0.855823
MOR.HI	DEV.CompRachis	-0.190128	0.102292	0.394988
MOR.inf	DEV.CompRachis	0.224402	0.0679105	0.320321
MOR.Ovary_L_W	DEV.CompRachis	-0.0440683	0.707352	0.900565
MOR.Ovary_length	DEV.CompRachis	0.089303	0.446107	0.762823
MOR.Ovary_width	DEV.CompRachis	0.0987482	0.399293	0.731599
MOR.PW	DEV.CompRachis	0.409559	0.000263523	0.00591467
MOR.RED	DEV.CompRachis	0.197838	0.088866	0.367474
MOR.Seed_L_W	DEV.CompRachis	-0.0857468	0.464495	0.77414
MOR.Seed_Length	DEV.CompRachis	-0.00688017	0.953932	0.98561
MOR.Seed_Width	DEV.CompRachis	-0.0199716	0.864955	0.95578
MOR.Seed_Wt	DEV.CompRachis	0.156785	0.179169	0.518861
MOR.SN_fruit	DEV.CompRachis	0.0976387	0.404638	0.73485
MOR.SN_fruit_unit	DEV.CompRachis	0.0271693	0.817017	0.940198
MOR.SN_plant	DEV.CompRachis	0.237127	0.0405208	0.237262
MOR.Style_L_W	DEV.CompRachis	0.214339	0.064809	0.313031
MOR.Style_length	DEV.CompRachis	0.14165	0.225419	0.574454
MOR.Style_width	DEV.CompRachis	-0.122703	0.29429	0.646411
MOR.SW_fruit	DEV.CompRachis	0.135277	0.247196	0.597242
MOR.SW_plant	DEV.CompRachis	0.256728	0.026189	0.182446
MOR.TY	DEV.CompRachis	0.23138	0.0457877	0.254572
SED.Adenine_seeds	DEV.CompRachis	-0.0193534	0.875522	0.959237
SED.Alanine_seeds	DEV.CompRachis	-0.113632	0.335054	0.680989
SED.Arginine_seeds	DEV.CompRachis	-0.152551	0.194438	0.53866
SED.Asparagine_seeds	DEV.CompRachis	-0.0386375	0.743792	0.914686
SED.Aspartate_seeds	DEV.CompRachis	0.149352	0.204071	0.550351
SED.Benzoate_seeds	DEV.CompRachis	0.107323	0.362747	0.703898
SED.Citrate_seeds	DEV.CompRachis	0.0879526	0.456174	0.769118
SED.Erythritol_seeds	DEV.CompRachis	0.264569	0.0227317	0.166855
SED.Fructose_seeds	DEV.CompRachis	-0.0330396	0.779896	0.926453
SED.Fumarate_seeds	DEV.CompRachis	0.065087	0.581666	0.841844
SED.GABA_seeds	DEV.CompRachis	0.0386375	0.743792	0.914686
SED.Galactinol_seeds	DEV.CompRachis	-0.133756	0.276849	0.627233
SED.Galactonic_acid_1_4_lactone_seeds	DEV.CompRachis	-0.0691448	0.558292	0.829166
SED.Glutamate_seeds	DEV.CompRachis	-0.010174	0.931441	0.978925
SED.Glycerate_seeds	DEV.CompRachis	0.302599	0.00878054	0.0882028
SED.Glycerol_1P_seeds	DEV.CompRachis	0.0586894	0.619402	0.859666
SED.Glycerol_seeds	DEV.CompRachis	0.0413328	0.726598	0.908495
SED.Glycine_seeds	DEV.CompRachis	-0.0593706	0.615334	0.858276
SED.Glycolate_seeds	DEV.CompRachis	-0.0829741	0.49789	0.794683
SED.Isoleucine_seeds	DEV.CompRachis	-0.0612366	0.604252	0.852537
SED.Lysine_seeds	DEV.CompRachis	-0.0442355	0.708231	0.901014
SED.Malate_seeds	DEV.CompRachis	0.203495	0.0820394	0.352203
SED.Maltotriose_seeds	DEV.CompRachis	-0.00164141	0.989401	0.996978
SED.Melezitose_seeds	DEV.CompRachis	0.253373	0.0293937	0.195627
SED.Myo_Inositol_seeds	DEV.CompRachis	-0.186612	0.111387	0.413504
SED.NA_sugar_seeds	DEV.CompRachis	-0.0335431	0.776628	0.925847
SED.Nicotinate_seeds	DEV.CompRachis	0.0464742	0.704542	0.899362
SED.Nonanoate_seeds	DEV.CompRachis	0.195633	0.109862	0.4102
SED.Octadecanoate_seeds	DEV.CompRachis	-0.113899	0.333914	0.680408
SED.Phenylalanine_seeds	DEV.CompRachis	0.0825916	0.484189	0.785286
SED.Phosphate_seeds	DEV.CompRachis	0.0700037	0.553402	0.826351
SED.Proline_seeds	DEV.CompRachis	-0.0620659	0.599355	0.849897
SED.Putrescine_seeds	DEV.CompRachis	-0.0105294	0.929052	0.978526
SED.Raffinose_seeds	DEV.CompRachis	0.108834	0.355991	0.699332
SED.Salicylate_seeds	DEV.CompRachis	0.0570307	0.629353	0.865144
SED.Serine_seeds	DEV.CompRachis	-0.0361792	0.759584	0.9192
SED.Succinate_seeds	DEV.CompRachis	-0.0355766	0.773328	0.925057
SED.Threonine_seeds	DEV.CompRachis	-0.122695	0.297673	0.649354
SED.Trehalose_alpha_alpha_seeds	DEV.CompRachis	0.243296	0.0439652	0.248742
SED.Tyrosine_seeds	DEV.CompRachis	-0.047227	0.689475	0.892772
SED.Uracil_seeds	DEV.CompRachis	-0.00217582	0.98595	0.99567
SED.Urea_seeds	DEV.CompRachis	0.110996	0.346458	0.691434
SED.Valine_seeds	DEV.CompRachis	-0.0497445	0.673832	0.88563
SED.X4_Hydroxy_Benzoate_seeds	DEV.CompRachis	0.104421	0.375946	0.714123
WAX.anteiso_ACL	DEV.CompRachis	0.187764	0.114237	0.418283
WAX.anteiso_CPI	DEV.CompRachis	0.0233837	0.845415	0.950453
WAX.eps_iC31	DEV.CompRachis	-0.00713872	0.952542	0.985163
WAX.eps_nC31	DEV.CompRachis	-0.0849251	0.478148	0.782028
WAX.eps_iC33	DEV.CompRachis	0.0682037	0.569178	0.834651
WAX.eps_nC33	DEV.CompRachis	-0.0674696	0.573352	0.836998
WAX.n31.i31	DEV.CompRachis	0.131669	0.270243	0.621507
WAX.n33.i33	DEV.CompRachis	-0.154258	0.195743	0.540474
WAX.iso_ACL	DEV.CompRachis	-0.0700809	0.558569	0.829269
WAX.iso_CPI	DEV.CompRachis	0.0319313	0.79003	0.930961
WAX.mindex	DEV.CompRachis	0.135356	0.256937	0.607192
WAX.nalk_ACL	DEV.CompRachis	-0.0294084	0.806283	0.935873
WAX.nalk_CPI	DEV.CompRachis	-0.238408	0.0437235	0.248027
WAX.pct_iso	DEV.CompRachis	0.191781	0.106559	0.403416
WAX.pct_anteiso	DEV.CompRachis	0.0706798	0.555204	0.827524
DEV.CompAll	DEV.CompSec	0.924019	0	0
DEV.CompInt	DEV.CompSec	0.700123	1.948e-12	3.70597e-10
DEV.CompPri	DEV.CompSec	0.76257	1.33227e-15	3.84105e-13
DEV.CompRachis	DEV.CompSec	0.731811	5.9508e-14	1.45982e-11
DEV.CompSec	DEV.CompSec	1	NA	NA
DEV.CotPaveAR	DEV.CompSec	0.0337221	0.777001	0.925847
DEV.CotPaveArea	DEV.CompSec	0.198044	0.0930423	0.377378
DEV.CotPaveCirc	DEV.CompSec	-0.166883	0.158199	0.488668
DEV.CotPaveCnt	DEV.CompSec	-0.186814	0.113523	0.417124
DEV.CotPaveRound	DEV.CompSec	-0.0405714	0.733255	0.910992
DEV.CotPaveSolid	DEV.CompSec	0.132451	0.263969	0.614483
DEV.CotStom	DEV.CompSec	-0.214463	0.0684541	0.3218
DEV.CotStomInd	DEV.CompSec	-0.0510613	0.66791	0.883166
DEV.FlowTime	DEV.CompSec	0.240976	0.0444767	0.250521
DEV.LatLfSize	DEV.CompSec	-0.295076	0.0112667	0.104756
DEV.LatPC1	DEV.CompSec	0.103913	0.381639	0.71886
DEV.LatPC2	DEV.CompSec	-0.330341	0.00431298	0.0532995
DEV.LatPC3	DEV.CompSec	0.390411	0.000638556	0.0121235
DEV.LatPC4	DEV.CompSec	-0.528076	1.5756e-06	7.91082e-05
DEV.LatPC5	DEV.CompSec	0.352801	0.00220307	0.0319725
DEV.LfAbStom	DEV.CompSec	0.377885	0.000980555	0.01701
DEV.LfAdStom	DEV.CompSec	0.18524	0.116651	0.422737
DEV.LfStomRatio	DEV.CompSec	0.027243	0.819033	0.940763
DEV.LftAR	DEV.CompSec	-0.183111	0.120987	0.430563
DEV.LftCirc	DEV.CompSec	-0.468561	2.90528e-05	0.000953585
DEV.LftRound	DEV.CompSec	0.167068	0.157732	0.488281
DEV.LftSolid	DEV.CompSec	0.536437	9.9936e-07	5.27323e-05
DEV.TermLfSize	DEV.CompSec	-0.408799	0.000329729	0.00710417
DEV.TermPC1	DEV.CompSec	0.0486548	0.682705	0.889846
DEV.TermPC3	DEV.CompSec	0.487042	1.24503e-05	0.000472434
DEV.TermPC4	DEV.CompSec	-0.53872	8.80644e-07	4.71803e-05
DEV.TermPC5	DEV.CompSec	0.428576	0.000155061	0.00385119
ENZ.aa_cont	DEV.CompSec	-0.0640875	0.582314	0.84208
ENZ.ac_inv	DEV.CompSec	-0.0746685	0.521489	0.808378
ENZ.aconi	DEV.CompSec	0.0431442	0.711337	0.902266
ENZ.agpa	DEV.CompSec	-0.193485	0.0962637	0.383929
ENZ.ala_ami	DEV.CompSec	0.105619	0.363855	0.705118
ENZ.asp_ami	DEV.CompSec	0.04689	0.687519	0.891839
ENZ.fbp_ald	DEV.CompSec	-0.133999	0.24849	0.598455
ENZ.fru_kin	DEV.CompSec	-0.0190841	0.870023	0.957169
ENZ.fructose_e	DEV.CompSec	0.00374573	0.974382	0.991073
ENZ.fuma	DEV.CompSec	-0.0336273	0.774564	0.925189
ENZ.g6pdh	DEV.CompSec	-0.00571429	0.960927	0.987636
ENZ.gadph	DEV.CompSec	-0.0501435	0.667074	0.883048
ENZ.gapdh_p	DEV.CompSec	-0.120246	0.300824	0.652184
ENZ.gluc_kin	DEV.CompSec	0.0299932	0.797025	0.933278
ENZ.glucose_e	DEV.CompSec	0.551005	2.50075e-07	1.504e-05
ENZ.gluta_dh	DEV.CompSec	-0.27661	0.0155692	0.129984
ENZ.iso_ci_dh	DEV.CompSec	-0.0782228	0.501801	0.796897
ENZ.mal_dh	DEV.CompSec	0.225673	0.0499801	0.268332
ENZ.pep_car	DEV.CompSec	-0.115024	0.322455	0.671422
ENZ.ph_fru_kin	DEV.CompSec	-0.10674	0.358756	0.701277
ENZ.ph_fru_kin_a	DEV.CompSec	-0.0643609	0.580702	0.841272
ENZ.ph_glu_is_c	DEV.CompSec	-0.064853	0.577806	0.839826
ENZ.ph_glu_is_t	DEV.CompSec	-0.0857143	0.461602	0.772356
ENZ.ph_glu_mut	DEV.CompSec	-0.110841	0.340482	0.685819
ENZ.ph_gly_kin	DEV.CompSec	0.231634	0.0440789	0.249133
ENZ.pro_con	DEV.CompSec	0.0722625	0.535033	0.816662
ENZ.pyr_kin	DEV.CompSec	-0.00579631	0.960366	0.987484
ENZ.shik_de	DEV.CompSec	0.189036	0.101955	0.394641
ENZ.starch	DEV.CompSec	-0.195162	0.0933594	0.377897
ENZ.suc_p_syn	DEV.CompSec	-0.070622	0.544367	0.821244
ENZ.suc_syn	DEV.CompSec	-0.102283	0.379286	0.716775
ENZ.succ_co_l	DEV.CompSec	0.10925	0.357533	0.700857
ENZ.sucrose_e	DEV.CompSec	0.131511	0.257463	0.607848
ENZ.tr_ph_iso	DEV.CompSec	0.00929597	0.936477	0.980724
ENZ.udp_glu	DEV.CompSec	-0.0630759	0.588295	0.845222
MET.a_tocopherol	DEV.CompSec	0.104744	0.367864	0.708275
MET.aconitate	DEV.CompSec	-0.0787724	0.519978	0.807615
MET.alanine	DEV.CompSec	0.0583459	0.616621	0.858744
MET.arabinose	DEV.CompSec	0.0793928	0.50133	0.796724
MET.arginine	DEV.CompSec	-0.158065	0.1756	0.513405
MET.asparagine	DEV.CompSec	-0.298947	0.00870947	0.0878243
MET.aspartate	DEV.CompSec	-0.00524949	0.964103	0.988758
MET.b_alanine	DEV.CompSec	0.0738756	0.525933	0.811579
MET.benzoate	DEV.CompSec	-0.148734	0.202828	0.548735
MET.citramalate	DEV.CompSec	0.240574	0.0363162	0.222285
MET.citrate	DEV.CompSec	0.126562	0.275959	0.626062
MET.cysteine	DEV.CompSec	0.19192	0.0990379	0.389494
MET.dehydroascorbate	DEV.CompSec	0.2111	0.0671724	0.318667
MET.erythritol	DEV.CompSec	0.193876	0.0933237	0.377862
MET.fa16_0	DEV.CompSec	-0.00442926	0.969709	0.989921
MET.fa18_0	DEV.CompSec	-0.0315789	0.786542	0.929492
MET.fa18_2	DEV.CompSec	-0.224524	0.0544574	0.28313
MET.fructose	DEV.CompSec	0.333725	0.00321818	0.0427958
MET.fructose_6p	DEV.CompSec	0.239836	0.0369107	0.224743
MET.fucose	DEV.CompSec	0.123377	0.294978	0.647059
MET.fumarate	DEV.CompSec	0.0362731	0.757352	0.918544
MET.gaba	DEV.CompSec	0.12555	0.279846	0.630483
MET.galactose	DEV.CompSec	0.154149	0.183673	0.524518
MET.galacturonate	DEV.CompSec	0.215448	0.0616066	0.30391
MET.gluconate	DEV.CompSec	-0.0319344	0.784197	0.928408
MET.glucose	DEV.CompSec	0.37583	0.000820847	0.0147058
MET.glucose_6p	DEV.CompSec	0.195653	0.0903022	0.370673
MET.glutamate	DEV.CompSec	0.000455192	0.996908	0.999409
MET.glutamine	DEV.CompSec	-0.0870152	0.467344	0.775745
MET.glycerate	DEV.CompSec	-0.0509364	0.662127	0.88013
MET.glycerate_3p	DEV.CompSec	0.112422	0.357724	0.701109
MET.glycerol	DEV.CompSec	0.0177268	0.880838	0.961118
MET.glycerol_1p	DEV.CompSec	0.210772	0.0676084	0.319327
MET.glycine	DEV.CompSec	-0.0214081	0.854359	0.952862
MET.homoserine	DEV.CompSec	0.00177717	0.987844	0.99661
MET.inositol	DEV.CompSec	0.254327	0.0266221	0.184377
MET.inositol_1p	DEV.CompSec	-5.46822e-05	0.999626	0.999745
MET.isocitrate	DEV.CompSec	0.0966507	0.40622	0.735774
MET.isoleucine	DEV.CompSec	-0.0705126	0.544992	0.821495
MET.isomaltose	DEV.CompSec	-0.000547945	0.996303	0.999258
MET.l_ascorbate	DEV.CompSec	-0.00790896	0.946308	0.983683
MET.leucine	DEV.CompSec	-0.123363	0.288376	0.640159
MET.lysine	DEV.CompSec	-0.13419	0.247808	0.597792
MET.malate	DEV.CompSec	-0.00713602	0.951216	0.984882
MET.maleate	DEV.CompSec	-0.322166	0.00614579	0.0684334
MET.maltitol	DEV.CompSec	0.110704	0.341081	0.686433
MET.maltose	DEV.CompSec	0.275516	0.0160003	0.132269
MET.mannitol	DEV.CompSec	-0.00896159	0.939174	0.981369
MET.mannose	DEV.CompSec	0.195981	0.089753	0.369149
MET.methionine	DEV.CompSec	-0.0891046	0.444006	0.76153
MET.oxoproline_5	DEV.CompSec	-0.05327	0.663766	0.880843
MET.phenylalanine	DEV.CompSec	0.116446	0.31647	0.667216
MET.phosphate	DEV.CompSec	0.0498154	0.669125	0.883601
MET.proline	DEV.CompSec	0.25028	0.0292157	0.194767
MET.putrescine	DEV.CompSec	-0.153602	0.185252	0.527196
MET.quinate	DEV.CompSec	0.189993	0.100201	0.391534
MET.rhamnose	DEV.CompSec	-0.0669036	0.565812	0.83286
MET.ribose	DEV.CompSec	0.00883117	0.939647	0.981425
MET.s_me_cysteine	DEV.CompSec	-0.144097	0.217425	0.566488
MET.saccharate	DEV.CompSec	0.0434997	0.709064	0.901473
MET.serine	DEV.CompSec	0.095393	0.412384	0.739894
MET.shikimate	DEV.CompSec	0.109718	0.358899	0.701298
MET.sorbitol	DEV.CompSec	0.0247226	0.833246	0.945476
MET.succinate	DEV.CompSec	0.0628298	0.589754	0.846073
MET.sucrose	DEV.CompSec	0.151716	0.190774	0.534052
MET.t4_ho_proline	DEV.CompSec	0.0252376	0.832152	0.945093
MET.threonate	DEV.CompSec	0.0485031	0.677354	0.886832
MET.threonine	DEV.CompSec	-0.0847574	0.466636	0.775398
MET.trehalose	DEV.CompSec	0.00131237	0.991023	0.997551
MET.tryptophan	DEV.CompSec	-0.0154477	0.894632	0.966879
MET.tyrosine	DEV.CompSec	-0.0631852	0.587647	0.844856
MET.uracil	DEV.CompSec	-0.124125	0.288685	0.640337
MET.valine	DEV.CompSec	-0.156637	0.176613	0.514934
MOR.Anther_L_W	DEV.CompSec	0.232148	0.0450526	0.252405
MOR.Anther_length	DEV.CompSec	0.0802276	0.493833	0.792206
MOR.Anther_width	DEV.CompSec	-0.203784	0.079494	0.347418
MOR.BM	DEV.CompSec	0.472575	1.86107e-05	0.000656327
MOR.BX	DEV.CompSec	0.402105	0.000348829	0.00746392
MOR.BY	DEV.CompSec	0.408734	0.000271919	0.00607873
MOR.EA	DEV.CompSec	-0.257504	0.0257243	0.180764
MOR.flowers_inf	DEV.CompSec	-0.145383	0.240449	0.590774
MOR.flowers_plant	DEV.CompSec	0.267619	0.0285651	0.19217
MOR.FN	DEV.CompSec	0.348933	0.00215391	0.0313894
MOR.Fruit_L_Pt	DEV.CompSec	-0.0595164	0.612001	0.85682
MOR.Fruit_L_W	DEV.CompSec	0.162304	0.164155	0.49705
MOR.Fruit_length	DEV.CompSec	0.0593457	0.613023	0.857405
MOR.Fruit_locule	DEV.CompSec	-0.11351	0.332218	0.679154
MOR.Fruit_peric_thick	DEV.CompSec	0.218151	0.0600776	0.300023
MOR.Fruit_W_Pt	DEV.CompSec	-0.210754	0.0695283	0.32418
MOR.Fruit_width	DEV.CompSec	-0.0211664	0.856958	0.953441
MOR.FW	DEV.CompSec	-0.022276	0.849545	0.951248
MOR.HI	DEV.CompSec	-0.20495	0.0777513	0.343018
MOR.inf	DEV.CompSec	0.349464	0.00374774	0.048166
MOR.Ovary_L_W	DEV.CompSec	0.0831579	0.478137	0.782028
MOR.Ovary_length	DEV.CompSec	0.139687	0.231979	0.58137
MOR.Ovary_width	DEV.CompSec	0.0223044	0.849355	0.951248
MOR.PW	DEV.CompSec	0.513485	2.46353e-06	0.000115985
MOR.RED	DEV.CompSec	0.301935	0.00847189	0.0860214
MOR.Seed_L_W	DEV.CompSec	-0.0416785	0.722561	0.906934
MOR.Seed_Length	DEV.CompSec	-0.0185425	0.876265	0.959537
MOR.Seed_Width	DEV.CompSec	-0.0178094	0.879459	0.96059
MOR.Seed_Wt	DEV.CompSec	0.17596	0.131024	0.447125
MOR.SN_fruit	DEV.CompSec	0.116529	0.319435	0.669575
MOR.SN_fruit_unit	DEV.CompSec	0.0883926	0.450775	0.765372
MOR.SN_plant	DEV.CompSec	0.276529	0.0163225	0.13406
MOR.Style_L_W	DEV.CompSec	0.215306	0.0635809	0.309558
MOR.Style_length	DEV.CompSec	0.198293	0.088119	0.365807
MOR.Style_width	DEV.CompSec	-0.124609	0.286796	0.638192
MOR.SW_fruit	DEV.CompSec	0.145633	0.21251	0.560034
MOR.SW_plant	DEV.CompSec	0.304467	0.00791102	0.0818799
MOR.TY	DEV.CompSec	0.31431	0.00602795	0.067458
SED.Adenine_seeds	DEV.CompSec	-0.0839409	0.496147	0.794052
SED.Alanine_seeds	DEV.CompSec	-0.0705072	0.550545	0.824637
SED.Arginine_seeds	DEV.CompSec	-0.132084	0.261942	0.612525
SED.Asparagine_seeds	DEV.CompSec	0.0260792	0.825435	0.942589
SED.Aspartate_seeds	DEV.CompSec	0.0670715	0.570179	0.835243
SED.Benzoate_seeds	DEV.CompSec	0.119852	0.309094	0.66001
SED.Citrate_seeds	DEV.CompSec	0.0561718	0.634532	0.868401
SED.Erythritol_seeds	DEV.CompSec	0.298038	0.00990672	0.095502
SED.Fructose_seeds	DEV.CompSec	-0.0207479	0.860718	0.953995
SED.Fumarate_seeds	DEV.CompSec	-0.0490929	0.677868	0.88714
SED.GABA_seeds	DEV.CompSec	0.0800444	0.497813	0.794683
SED.Galactinol_seeds	DEV.CompSec	-0.19842	0.104793	0.399543
SED.Galactonic_acid_1_4_lactone_seeds	DEV.CompSec	0.0285672	0.809082	0.937118
SED.Glutamate_seeds	DEV.CompSec	-0.000162903	0.998901	0.999723
SED.Glycerate_seeds	DEV.CompSec	0.222125	0.0571583	0.290795
SED.Glycerol_1P_seeds	DEV.CompSec	0.0764902	0.517152	0.80617
SED.Glycerol_seeds	DEV.CompSec	-0.0812588	0.491293	0.790072
SED.Glycine_seeds	DEV.CompSec	-0.0320622	0.78625	0.929488
SED.Glycolate_seeds	DEV.CompSec	-0.0591158	0.629448	0.865232
SED.Isoleucine_seeds	DEV.CompSec	-0.06796	0.56507	0.832596
SED.Lysine_seeds	DEV.CompSec	-0.0171344	0.884792	0.962827
SED.Malate_seeds	DEV.CompSec	0.235246	0.0436305	0.247774
SED.Maltotriose_seeds	DEV.CompSec	-0.101767	0.408927	0.738213
SED.Melezitose_seeds	DEV.CompSec	0.236046	0.0429	0.245202
SED.Myo_Inositol_seeds	DEV.CompSec	-0.19304	0.0993818	0.390061
SED.NA_sugar_seeds	DEV.CompSec	0.0344613	0.770679	0.923978
SED.Nicotinate_seeds	DEV.CompSec	-0.0927293	0.448553	0.763901
SED.Nonanoate_seeds	DEV.CompSec	0.129862	0.291199	0.642752
SED.Octadecanoate_seeds	DEV.CompSec	-0.138541	0.239126	0.589146
SED.Phenylalanine_seeds	DEV.CompSec	0.0290707	0.805783	0.935873
SED.Phosphate_seeds	DEV.CompSec	0.0622732	0.598133	0.849683
SED.Proline_seeds	DEV.CompSec	-0.171803	0.143289	0.46639
SED.Putrescine_seeds	DEV.CompSec	-0.0205998	0.861702	0.954453
SED.Raffinose_seeds	DEV.CompSec	0.120948	0.304659	0.655619
SED.Salicylate_seeds	DEV.CompSec	-0.0179045	0.879652	0.960689
SED.Serine_seeds	DEV.CompSec	-0.0862347	0.465053	0.774423
SED.Succinate_seeds	DEV.CompSec	-0.105165	0.393381	0.727918
SED.Threonine_seeds	DEV.CompSec	-0.116179	0.324261	0.672322
SED.Trehalose_alpha_alpha_seeds	DEV.CompSec	0.142382	0.243184	0.593574
SED.Tyrosine_seeds	DEV.CompSec	-0.117216	0.319933	0.669954
SED.Uracil_seeds	DEV.CompSec	-0.0976448	0.428263	0.75112
SED.Urea_seeds	DEV.CompSec	0.018793	0.873728	0.958674
SED.Valine_seeds	DEV.CompSec	-0.0900555	0.445433	0.762455
SED.X4_Hydroxy_Benzoate_seeds	DEV.CompSec	0.018171	0.877874	0.960045
WAX.anteiso_ACL	DEV.CompSec	0.0934174	0.435092	0.755466
WAX.anteiso_CPI	DEV.CompSec	0.137311	0.250066	0.599784
WAX.eps_iC31	DEV.CompSec	-0.0132484	0.912049	0.972273
WAX.eps_nC31	DEV.CompSec	-0.0310631	0.795613	0.932765
WAX.eps_iC33	DEV.CompSec	0.0533796	0.65608	0.877264
WAX.eps_nC33	DEV.CompSec	-0.0445563	0.710161	0.902046
WAX.n31.i31	DEV.CompSec	0.00537293	0.964272	0.988758
WAX.n33.i33	DEV.CompSec	-0.0886413	0.459032	0.770083
WAX.iso_ACL	DEV.CompSec	0.0429014	0.720475	0.905674
WAX.iso_CPI	DEV.CompSec	-0.0644093	0.590905	0.846352
WAX.mindex	DEV.CompSec	0.0208228	0.862169	0.954629
WAX.nalk_ACL	DEV.CompSec	0.041959	0.726371	0.908397
WAX.nalk_CPI	DEV.CompSec	-0.213422	0.0718522	0.329846
WAX.pct_iso	DEV.CompSec	0.119139	0.318864	0.669108
WAX.pct_anteiso	DEV.CompSec	-0.0244389	0.838532	0.947835
DEV.CompAll	DEV.CotPaveAR	0.0286314	0.809979	0.93732
DEV.CompInt	DEV.CotPaveAR	0.037517	0.752668	0.917107
DEV.CompPri	DEV.CotPaveAR	-0.135382	0.253451	0.603544
DEV.CompRachis	DEV.CotPaveAR	0.0239417	0.840654	0.94893
DEV.CompSec	DEV.CotPaveAR	0.0337221	0.777001	0.925847
DEV.CotPaveAR	DEV.CotPaveAR	1	NA	NA
DEV.CotPaveArea	DEV.CotPaveAR	0.0431322	0.717106	0.904677
DEV.CotPaveCirc	DEV.CotPaveAR	-0.144298	0.223227	0.57189
DEV.CotPaveCnt	DEV.CotPaveAR	0.00802172	0.946299	0.983683
DEV.CotPaveRound	DEV.CotPaveAR	-0.97939	0	0
DEV.CotPaveSolid	DEV.CotPaveAR	0.122393	0.302278	0.653587
DEV.CotStom	DEV.CotPaveAR	0.100073	0.399572	0.731856
DEV.CotStomInd	DEV.CotPaveAR	0.113075	0.340843	0.686349
DEV.FlowTime	DEV.CotPaveAR	-0.0144465	0.907629	0.970742
DEV.LatLfSize	DEV.CotPaveAR	0.0214118	0.857305	0.953622
DEV.LatPC1	DEV.CotPaveAR	-0.137358	0.246525	0.596292
DEV.LatPC2	DEV.CotPaveAR	0.0964149	0.417111	0.743365
DEV.LatPC3	DEV.CotPaveAR	0.0508762	0.669044	0.883601
DEV.LatPC4	DEV.CotPaveAR	0.0276441	0.816415	0.94002
DEV.LatPC5	DEV.CotPaveAR	0.0713933	0.548357	0.823459
DEV.LfAbStom	DEV.CotPaveAR	-0.115544	0.330339	0.677988
DEV.LfAdStom	DEV.CotPaveAR	-0.126805	0.28505	0.63627
DEV.LfStomRatio	DEV.CotPaveAR	0.079847	0.501895	0.796956
DEV.LftAR	DEV.CotPaveAR	-0.0816673	0.492164	0.790843
DEV.LftCirc	DEV.CotPaveAR	0.0627545	0.597887	0.849623
DEV.LftRound	DEV.CotPaveAR	0.0942552	0.42767	0.750772
DEV.LftSolid	DEV.CotPaveAR	-0.00166605	0.988839	0.996789
DEV.TermLfSize	DEV.CotPaveAR	0.00388745	0.973961	0.991008
DEV.TermPC1	DEV.CotPaveAR	-0.188449	0.110342	0.411059
DEV.TermPC3	DEV.CotPaveAR	-0.175645	0.137176	0.457515
DEV.TermPC4	DEV.CotPaveAR	0.0315624	0.790947	0.931115
DEV.TermPC5	DEV.CotPaveAR	-0.0240652	0.839844	0.948506
ENZ.aa_cont	DEV.CotPaveAR	0.212175	0.0715282	0.32879
ENZ.ac_inv	DEV.CotPaveAR	-0.034586	0.771442	0.924303
ENZ.aconi	DEV.CotPaveAR	0.145718	0.218659	0.567027
ENZ.agpa	DEV.CotPaveAR	0.251624	0.0329931	0.210396
ENZ.ala_ami	DEV.CotPaveAR	0.0176478	0.882191	0.961692
ENZ.asp_ami	DEV.CotPaveAR	0.193231	0.101433	0.393544
ENZ.fbp_ald	DEV.CotPaveAR	0.311706	0.00726423	0.0771266
ENZ.fru_kin	DEV.CotPaveAR	0.113569	0.338726	0.684105
ENZ.fructose_e	DEV.CotPaveAR	-0.0997779	0.400972	0.732579
ENZ.fuma	DEV.CotPaveAR	0.166249	0.162801	0.495069
ENZ.g6pdh	DEV.CotPaveAR	0.055535	0.640742	0.871227
ENZ.gadph	DEV.CotPaveAR	0.324602	0.00508134	0.059858
ENZ.gapdh_p	DEV.CotPaveAR	0.0842589	0.478483	0.782053
ENZ.gluc_kin	DEV.CotPaveAR	0.117611	0.321701	0.671045
ENZ.glucose_e	DEV.CotPaveAR	0.16716	0.157498	0.487882
ENZ.gluta_dh	DEV.CotPaveAR	-0.176077	0.136197	0.455772
ENZ.iso_ci_dh	DEV.CotPaveAR	0.218715	0.0630232	0.307947
ENZ.mal_dh	DEV.CotPaveAR	0.284247	0.014802	0.125822
ENZ.pep_car	DEV.CotPaveAR	0.314698	0.00669509	0.0728824
ENZ.ph_fru_kin	DEV.CotPaveAR	0.306121	0.00844067	0.0858058
ENZ.ph_fru_kin_a	DEV.CotPaveAR	0.232877	0.0474	0.259715
ENZ.ph_glu_is_c	DEV.CotPaveAR	0.324016	0.00516626	0.0604785
ENZ.ph_glu_is_t	DEV.CotPaveAR	0.250524	0.0325366	0.208888
ENZ.ph_glu_mut	DEV.CotPaveAR	0.273602	0.0191707	0.149381
ENZ.ph_gly_kin	DEV.CotPaveAR	0.318771	0.00598374	0.0672053
ENZ.pro_con	DEV.CotPaveAR	0.187276	0.112616	0.415447
ENZ.pyr_kin	DEV.CotPaveAR	0.194496	0.0991724	0.389749
ENZ.shik_de	DEV.CotPaveAR	0.227107	0.0533294	0.279552
ENZ.starch	DEV.CotPaveAR	0.166624	0.161841	0.493864
ENZ.suc_p_syn	DEV.CotPaveAR	0.327533	0.00467497	0.0567202
ENZ.suc_syn	DEV.CotPaveAR	-0.0527582	0.657552	0.877845
ENZ.succ_co_l	DEV.CotPaveAR	0.0693028	0.568627	0.834281
ENZ.sucrose_e	DEV.CotPaveAR	0.169659	0.151294	0.479062
ENZ.tr_ph_iso	DEV.CotPaveAR	0.234944	0.0454123	0.253594
ENZ.udp_glu	DEV.CotPaveAR	0.166204	0.159922	0.490986
MET.a_tocopherol	DEV.CotPaveAR	0.131926	0.265882	0.61681
MET.aconitate	DEV.CotPaveAR	0.206388	0.0963889	0.384264
MET.alanine	DEV.CotPaveAR	-0.0387202	0.745001	0.91498
MET.arabinose	DEV.CotPaveAR	0.236385	0.0471795	0.259168
MET.arginine	DEV.CotPaveAR	0.213711	0.0714586	0.32874
MET.asparagine	DEV.CotPaveAR	0.153678	0.194258	0.538415
MET.aspartate	DEV.CotPaveAR	0.222356	0.0586559	0.295269
MET.b_alanine	DEV.CotPaveAR	0.207454	0.0782199	0.344217
MET.benzoate	DEV.CotPaveAR	-0.0940253	0.432095	0.753178
MET.citramalate	DEV.CotPaveAR	-0.0791991	0.505382	0.798984
MET.citrate	DEV.CotPaveAR	0.00792916	0.946917	0.98382
MET.cysteine	DEV.CotPaveAR	-0.00453405	0.969847	0.989926
MET.dehydroascorbate	DEV.CotPaveAR	0.127977	0.280583	0.631162
MET.erythritol	DEV.CotPaveAR	-0.116932	0.324522	0.67246
MET.fa16_0	DEV.CotPaveAR	0.109712	0.355487	0.699264
MET.fa18_0	DEV.CotPaveAR	0.148649	0.209435	0.556121
MET.fa18_2	DEV.CotPaveAR	0.108149	0.369324	0.70962
MET.fructose	DEV.CotPaveAR	-0.0298346	0.802152	0.934541
MET.fructose_6p	DEV.CotPaveAR	0.0854313	0.472361	0.779032
MET.fucose	DEV.CotPaveAR	0.0266935	0.825116	0.942589
MET.fumarate	DEV.CotPaveAR	0.00588462	0.960872	0.987636
MET.gaba	DEV.CotPaveAR	0.205942	0.0804655	0.349748
MET.galactose	DEV.CotPaveAR	-0.040232	0.735404	0.911416
MET.galacturonate	DEV.CotPaveAR	-0.213594	0.0696087	0.324286
MET.gluconate	DEV.CotPaveAR	-0.0488708	0.681373	0.888855
MET.glucose	DEV.CotPaveAR	0.0170616	0.886078	0.963455
MET.glucose_6p	DEV.CotPaveAR	0.0288782	0.808372	0.936725
MET.glutamate	DEV.CotPaveAR	0.17403	0.143731	0.467102
MET.glutamine	DEV.CotPaveAR	0.213993	0.0774623	0.342229
MET.glycerate	DEV.CotPaveAR	-0.0309145	0.795144	0.932504
MET.glycerate_3p	DEV.CotPaveAR	0.0929966	0.457673	0.769558
MET.glycerol	DEV.CotPaveAR	-0.00754527	0.950205	0.984705
MET.glycerol_1p	DEV.CotPaveAR	0.127237	0.283399	0.634397
MET.glycine	DEV.CotPaveAR	0.13421	0.257624	0.60793
MET.homoserine	DEV.CotPaveAR	0.0650068	0.584784	0.843384
MET.inositol	DEV.CotPaveAR	0.0256078	0.829727	0.944179
MET.inositol_1p	DEV.CotPaveAR	0.168734	0.15357	0.482184
MET.isocitrate	DEV.CotPaveAR	0.0506294	0.670556	0.884148
MET.isoleucine	DEV.CotPaveAR	0.119431	0.314216	0.664684
MET.isomaltose	DEV.CotPaveAR	0.0895708	0.457582	0.769558
MET.l_ascorbate	DEV.CotPaveAR	0.0558235	0.641393	0.871232
MET.leucine	DEV.CotPaveAR	0.0384734	0.746572	0.915497
MET.lysine	DEV.CotPaveAR	0.119462	0.31409	0.664684
MET.malate	DEV.CotPaveAR	-0.124152	0.295331	0.647173
MET.maleate	DEV.CotPaveAR	0.297859	0.0136273	0.119369
MET.maltitol	DEV.CotPaveAR	0.129612	0.274432	0.62435
MET.maltose	DEV.CotPaveAR	-0.0244354	0.837413	0.947106
MET.mannitol	DEV.CotPaveAR	-0.0271079	0.821175	0.941581
MET.mannose	DEV.CotPaveAR	-0.0868814	0.464848	0.774356
MET.methionine	DEV.CotPaveAR	0.069357	0.559852	0.830237
MET.oxoproline_5	DEV.CotPaveAR	0.385116	0.00140779	0.0227312
MET.phenylalanine	DEV.CotPaveAR	0.118937	0.316235	0.666965
MET.phosphate	DEV.CotPaveAR	0.115173	0.331901	0.679051
MET.proline	DEV.CotPaveAR	0.190763	0.105958	0.4023
MET.putrescine	DEV.CotPaveAR	-0.0943169	0.427366	0.750453
MET.quinate	DEV.CotPaveAR	-0.100025	0.399802	0.7321
MET.rhamnose	DEV.CotPaveAR	-0.0737073	0.535436	0.816789
MET.ribose	DEV.CotPaveAR	0.10203	0.390371	0.725405
MET.s_me_cysteine	DEV.CotPaveAR	-0.118625	0.320973	0.670349
MET.saccharate	DEV.CotPaveAR	-0.117086	0.323879	0.672047
MET.serine	DEV.CotPaveAR	0.022214	0.852018	0.951774
MET.shikimate	DEV.CotPaveAR	-0.240206	0.0451822	0.252845
MET.sorbitol	DEV.CotPaveAR	0.162872	0.171633	0.507441
MET.succinate	DEV.CotPaveAR	0.217111	0.0650296	0.313231
MET.sucrose	DEV.CotPaveAR	0.241701	0.039389	0.233281
MET.t4_ho_proline	DEV.CotPaveAR	0.141702	0.241946	0.592485
MET.threonate	DEV.CotPaveAR	-0.0578798	0.626685	0.863897
MET.threonine	DEV.CotPaveAR	0.0900592	0.448614	0.763901
MET.trehalose	DEV.CotPaveAR	-0.143465	0.225938	0.574702
MET.tryptophan	DEV.CotPaveAR	-0.0626928	0.598248	0.849683
MET.tyrosine	DEV.CotPaveAR	-0.0728742	0.54007	0.81929
MET.uracil	DEV.CotPaveAR	0.120651	0.312719	0.663695
MET.valine	DEV.CotPaveAR	0.0549488	0.644276	0.872061
MOR.Anther_L_W	DEV.CotPaveAR	0.0375265	0.754311	0.917815
MOR.Anther_length	DEV.CotPaveAR	-0.0601646	0.615643	0.858316
MOR.Anther_width	DEV.CotPaveAR	-0.176989	0.136939	0.457217
MOR.BM	DEV.CotPaveAR	0.12094	0.311551	0.662473
MOR.BX	DEV.CotPaveAR	0.223262	0.0594088	0.297619
MOR.BY	DEV.CotPaveAR	0.0578494	0.629322	0.865143
MOR.EA	DEV.CotPaveAR	-0.189665	0.110553	0.411462
MOR.flowers_inf	DEV.CotPaveAR	0.103508	0.411918	0.739542
MOR.flowers_plant	DEV.CotPaveAR	0.0560315	0.657532	0.877845
MOR.FN	DEV.CotPaveAR	0.0270757	0.821384	0.941581
MOR.Fruit_L_Pt	DEV.CotPaveAR	0.0790726	0.509096	0.80169
MOR.Fruit_L_W	DEV.CotPaveAR	0.0634124	0.596675	0.849234
MOR.Fruit_length	DEV.CotPaveAR	-0.00903595	0.93995	0.981578
MOR.Fruit_locule	DEV.CotPaveAR	-0.18515	0.119459	0.427812
MOR.Fruit_peric_thick	DEV.CotPaveAR	-0.174834	0.141861	0.464374
MOR.Fruit_W_Pt	DEV.CotPaveAR	0.0037623	0.974978	0.991227
MOR.Fruit_width	DEV.CotPaveAR	-0.119172	0.318732	0.668994
MOR.FW	DEV.CotPaveAR	-0.0943791	0.430358	0.752836
MOR.HI	DEV.CotPaveAR	-0.20802	0.0795246	0.347498
MOR.inf	DEV.CotPaveAR	0.0515354	0.683494	0.890293
MOR.Ovary_L_W	DEV.CotPaveAR	-0.00482346	0.967924	0.989647
MOR.Ovary_length	DEV.CotPaveAR	-0.0789761	0.509615	0.80174
MOR.Ovary_width	DEV.CotPaveAR	-0.0801981	0.503066	0.79791
MOR.PW	DEV.CotPaveAR	0.186411	0.116918	0.423333
MOR.RED	DEV.CotPaveAR	-0.0270757	0.821384	0.941581
MOR.Seed_L_W	DEV.CotPaveAR	-0.240498	0.041856	0.241698
MOR.Seed_Length	DEV.CotPaveAR	-0.0469819	0.697228	0.895852
MOR.Seed_Width	DEV.CotPaveAR	0.111583	0.350738	0.694542
MOR.Seed_Wt	DEV.CotPaveAR	0.0621905	0.603781	0.852537
MOR.SN_fruit	DEV.CotPaveAR	-0.0252106	0.833505	0.945516
MOR.SN_fruit_unit	DEV.CotPaveAR	0.00151135	0.989947	0.997152
MOR.SN_plant	DEV.CotPaveAR	0.0130233	0.913538	0.972866
MOR.Style_L_W	DEV.CotPaveAR	0.0923211	0.440524	0.759096
MOR.Style_length	DEV.CotPaveAR	0.0662422	0.580363	0.84111
MOR.Style_width	DEV.CotPaveAR	-0.106663	0.372515	0.711957
MOR.SW_fruit	DEV.CotPaveAR	0.0125088	0.916941	0.974106
MOR.SW_plant	DEV.CotPaveAR	0.0324137	0.786932	0.929588
MOR.TY	DEV.CotPaveAR	0.0327674	0.784663	0.928448
SED.Adenine_seeds	DEV.CotPaveAR	0.19799	0.113886	0.417604
SED.Alanine_seeds	DEV.CotPaveAR	-0.0932931	0.439027	0.757562
SED.Arginine_seeds	DEV.CotPaveAR	-0.207948	0.0818284	0.3521
SED.Asparagine_seeds	DEV.CotPaveAR	-0.0363179	0.763653	0.921166
SED.Aspartate_seeds	DEV.CotPaveAR	0.195808	0.101733	0.394328
SED.Benzoate_seeds	DEV.CotPaveAR	0.10778	0.370969	0.711194
SED.Citrate_seeds	DEV.CotPaveAR	-0.0469484	0.697434	0.895973
SED.Erythritol_seeds	DEV.CotPaveAR	0.132327	0.271304	0.622572
SED.Fructose_seeds	DEV.CotPaveAR	-0.0540912	0.65414	0.876644
SED.Fumarate_seeds	DEV.CotPaveAR	0.0692488	0.566081	0.833123
SED.GABA_seeds	DEV.CotPaveAR	0.101878	0.397885	0.730423
SED.Galactinol_seeds	DEV.CotPaveAR	-0.0310315	0.806156	0.935873
SED.Galactonic_acid_1_4_lactone_seeds	DEV.CotPaveAR	-0.198223	0.0975003	0.386491
SED.Glutamate_seeds	DEV.CotPaveAR	-0.164621	0.170101	0.505154
SED.Glycerate_seeds	DEV.CotPaveAR	0.1889	0.114637	0.418859
SED.Glycerol_1P_seeds	DEV.CotPaveAR	-0.270322	0.0226095	0.166219
SED.Glycerol_seeds	DEV.CotPaveAR	0.062609	0.603971	0.852537
SED.Glycine_seeds	DEV.CotPaveAR	-0.0576794	0.632802	0.867497
SED.Glycolate_seeds	DEV.CotPaveAR	0.0987997	0.429966	0.752514
SED.Isoleucine_seeds	DEV.CotPaveAR	-0.131288	0.275121	0.624921
SED.Lysine_seeds	DEV.CotPaveAR	-0.110094	0.360725	0.702657
SED.Malate_seeds	DEV.CotPaveAR	0.0705567	0.558751	0.829438
SED.Maltotriose_seeds	DEV.CotPaveAR	-0.0817308	0.517481	0.806322
SED.Melezitose_seeds	DEV.CotPaveAR	-0.18169	0.129412	0.444654
SED.Myo_Inositol_seeds	DEV.CotPaveAR	-0.17951	0.134151	0.452118
SED.NA_sugar_seeds	DEV.CotPaveAR	-0.0238431	0.84354	0.949909
SED.Nicotinate_seeds	DEV.CotPaveAR	-0.175827	0.157902	0.488484
SED.Nonanoate_seeds	DEV.CotPaveAR	0.16167	0.198229	0.544137
SED.Octadecanoate_seeds	DEV.CotPaveAR	0.09611	0.425271	0.749059
SED.Phenylalanine_seeds	DEV.CotPaveAR	-0.0493293	0.682887	0.89
SED.Phosphate_seeds	DEV.CotPaveAR	0.00362173	0.976086	0.991491
SED.Proline_seeds	DEV.CotPaveAR	-0.0884641	0.46318	0.773195
SED.Putrescine_seeds	DEV.CotPaveAR	-0.0699195	0.562316	0.831408
SED.Raffinose_seeds	DEV.CotPaveAR	-0.0414822	0.731238	0.910511
SED.Salicylate_seeds	DEV.CotPaveAR	0.0758551	0.529527	0.814115
SED.Serine_seeds	DEV.CotPaveAR	-0.136653	0.255805	0.605689
SED.Succinate_seeds	DEV.CotPaveAR	0.0837413	0.507196	0.800465
SED.Threonine_seeds	DEV.CotPaveAR	-0.170054	0.156245	0.485884
SED.Trehalose_alpha_alpha_seeds	DEV.CotPaveAR	0.0411857	0.742654	0.914132
SED.Tyrosine_seeds	DEV.CotPaveAR	-0.172535	0.150202	0.477539
SED.Uracil_seeds	DEV.CotPaveAR	0.110402	0.381302	0.718564
SED.Urea_seeds	DEV.CotPaveAR	-0.16338	0.173388	0.510256
SED.Valine_seeds	DEV.CotPaveAR	-0.119584	0.320555	0.670302
SED.X4_Hydroxy_Benzoate_seeds	DEV.CotPaveAR	0.0630785	0.601256	0.851077
WAX.anteiso_ACL	DEV.CotPaveAR	0.21351	0.0781498	0.344054
WAX.anteiso_CPI	DEV.CotPaveAR	-0.0376241	0.758898	0.919114
WAX.eps_iC31	DEV.CotPaveAR	-0.155572	0.201794	0.547797
WAX.eps_nC31	DEV.CotPaveAR	-0.150018	0.218564	0.567027
WAX.eps_iC33	DEV.CotPaveAR	-0.142528	0.242696	0.592978
WAX.eps_nC33	DEV.CotPaveAR	-0.114861	0.347322	0.692355
WAX.n31.i31	DEV.CotPaveAR	0.043849	0.720527	0.905674
WAX.n33.i33	DEV.CotPaveAR	-0.0856801	0.483928	0.785072
WAX.iso_ACL	DEV.CotPaveAR	0.0153956	0.900083	0.968461
WAX.iso_CPI	DEV.CotPaveAR	0.0624772	0.610057	0.855796
WAX.mindex	DEV.CotPaveAR	-0.0506239	0.679536	0.887907
WAX.nalk_ACL	DEV.CotPaveAR	0.0372417	0.761275	0.920044
WAX.nalk_CPI	DEV.CotPaveAR	-0.0414322	0.735348	0.911416
WAX.pct_iso	DEV.CotPaveAR	-0.0824991	0.500362	0.796238
WAX.pct_anteiso	DEV.CotPaveAR	-0.0240044	0.844782	0.950385
DEV.CompAll	DEV.CotPaveArea	0.227385	0.0530307	0.278411
DEV.CompInt	DEV.CotPaveArea	0.192799	0.102214	0.394988
DEV.CompPri	DEV.CotPaveArea	0.141491	0.232458	0.582051
DEV.CompRachis	DEV.CotPaveArea	0.199803	0.0901163	0.370125
DEV.CompSec	DEV.CotPaveArea	0.198044	0.0930423	0.377378
DEV.CotPaveAR	DEV.CotPaveArea	0.0431322	0.717106	0.904677
DEV.CotPaveArea	DEV.CotPaveArea	1	NA	NA
DEV.CotPaveCirc	DEV.CotPaveArea	-0.203166	0.0847231	0.358258
DEV.CotPaveCnt	DEV.CotPaveArea	-0.917037	0	0
DEV.CotPaveRound	DEV.CotPaveArea	-0.050506	0.671313	0.884519
DEV.CotPaveSolid	DEV.CotPaveArea	0.132204	0.264868	0.61548
DEV.CotStom	DEV.CotPaveArea	-0.493409	9.1914e-06	0.000359506
DEV.CotStomInd	DEV.CotPaveArea	0.298408	0.0103382	0.0985074
DEV.FlowTime	DEV.CotPaveArea	0.0307287	0.805024	0.935706
DEV.LatLfSize	DEV.CotPaveArea	0.0116006	0.922402	0.975881
DEV.LatPC1	DEV.CotPaveArea	0.175322	0.137911	0.458816
DEV.LatPC2	DEV.CotPaveArea	-0.11866	0.317374	0.667846
DEV.LatPC3	DEV.CotPaveArea	-0.0157966	0.894474	0.966879
DEV.LatPC4	DEV.CotPaveArea	-0.0266568	0.822863	0.942162
DEV.LatPC5	DEV.CotPaveArea	0.229483	0.0508183	0.271219
DEV.LfAbStom	DEV.CotPaveArea	-0.0101197	0.932283	0.979358
DEV.LfAdStom	DEV.CotPaveArea	-0.0883932	0.457086	0.769558
DEV.LfStomRatio	DEV.CotPaveArea	0.077749	0.513232	0.803951
DEV.LftAR	DEV.CotPaveArea	0.182278	0.122717	0.433597
DEV.LftCirc	DEV.CotPaveArea	-0.289738	0.012905	0.115156
DEV.LftRound	DEV.CotPaveArea	-0.179779	0.128021	0.442759
DEV.LftSolid	DEV.CotPaveArea	0.27749	0.0174619	0.14057
DEV.TermLfSize	DEV.CotPaveArea	-0.122424	0.302155	0.653423
DEV.TermPC1	DEV.CotPaveArea	0.132235	0.264756	0.615335
DEV.TermPC3	DEV.CotPaveArea	-0.0741084	0.533211	0.816253
DEV.TermPC4	DEV.CotPaveArea	-0.0489016	0.681182	0.88881
DEV.TermPC5	DEV.CotPaveArea	-0.0089473	0.940113	0.981672
ENZ.aa_cont	DEV.CotPaveArea	0.0136986	0.908424	0.971065
ENZ.ac_inv	DEV.CotPaveArea	-0.0724423	0.542481	0.820607
ENZ.aconi	DEV.CotPaveArea	0.0461249	0.698389	0.896295
ENZ.agpa	DEV.CotPaveArea	-0.0788475	0.510307	0.80224
ENZ.ala_ami	DEV.CotPaveArea	0.128008	0.280466	0.631066
ENZ.asp_ami	DEV.CotPaveArea	0.0824078	0.488234	0.787874
ENZ.fbp_ald	DEV.CotPaveArea	0.0198692	0.867489	0.956258
ENZ.fru_kin	DEV.CotPaveArea	-0.0881464	0.458348	0.769766
ENZ.fructose_e	DEV.CotPaveArea	0.23661	0.0438607	0.248275
ENZ.fuma	DEV.CotPaveArea	-0.184546	0.120691	0.429859
ENZ.g6pdh	DEV.CotPaveArea	0.0378255	0.7507	0.916746
ENZ.gadph	DEV.CotPaveArea	-0.0108602	0.927341	0.977679
ENZ.gapdh_p	DEV.CotPaveArea	-0.0199617	0.866877	0.956171
ENZ.gluc_kin	DEV.CotPaveArea	0.198445	0.0923685	0.375597
ENZ.glucose_e	DEV.CotPaveArea	0.164229	0.165014	0.498356
ENZ.gluta_dh	DEV.CotPaveArea	-0.168086	0.155179	0.48436
ENZ.iso_ci_dh	DEV.CotPaveArea	-0.0154572	0.896729	0.967512
ENZ.mal_dh	DEV.CotPaveArea	0.00669505	0.95517	0.985721
ENZ.pep_car	DEV.CotPaveArea	-0.0818215	0.491344	0.790072
ENZ.ph_fru_kin	DEV.CotPaveArea	0.117858	0.32068	0.670349
ENZ.ph_fru_kin_a	DEV.CotPaveArea	-0.00573862	0.961569	0.987942
ENZ.ph_glu_is_c	DEV.CotPaveArea	-0.0553807	0.641671	0.871284
ENZ.ph_glu_is_t	DEV.CotPaveArea	-0.0304825	0.797945	0.933501
ENZ.ph_glu_mut	DEV.CotPaveArea	0.00823769	0.944855	0.983546
ENZ.ph_gly_kin	DEV.CotPaveArea	-0.0193447	0.870957	0.957395
ENZ.pro_con	DEV.CotPaveArea	0.0650685	0.584427	0.843304
ENZ.pyr_kin	DEV.CotPaveArea	0.0983586	0.407737	0.737286
ENZ.shik_de	DEV.CotPaveArea	0.0652228	0.583534	0.842746
ENZ.starch	DEV.CotPaveArea	-0.0859008	0.473088	0.779392
ENZ.suc_p_syn	DEV.CotPaveArea	0.121406	0.306224	0.657544
ENZ.suc_syn	DEV.CotPaveArea	0.0311304	0.793745	0.932174
ENZ.succ_co_l	DEV.CotPaveArea	-0.0680081	0.575889	0.838775
ENZ.sucrose_e	DEV.CotPaveArea	0.118721	0.317121	0.667589
ENZ.tr_ph_iso	DEV.CotPaveArea	-0.00595458	0.960124	0.987308
ENZ.udp_glu	DEV.CotPaveArea	0.0780884	0.51139	0.802938
MET.a_tocopherol	DEV.CotPaveArea	0.0560286	0.637772	0.869644
MET.aconitate	DEV.CotPaveArea	0.195909	0.114916	0.419274
MET.alanine	DEV.CotPaveArea	-0.127607	0.281989	0.632825
MET.arabinose	DEV.CotPaveArea	-0.00912139	0.93982	0.981515
MET.arginine	DEV.CotPaveArea	0.0774648	0.517775	0.806496
MET.asparagine	DEV.CotPaveArea	-0.18342	0.120351	0.429173
MET.aspartate	DEV.CotPaveArea	0.112119	0.344969	0.690281
MET.b_alanine	DEV.CotPaveArea	0.142663	0.228571	0.577963
MET.benzoate	DEV.CotPaveArea	-0.0232812	0.846084	0.950542
MET.citramalate	DEV.CotPaveArea	-0.0265334	0.82367	0.942327
MET.citrate	DEV.CotPaveArea	0.22285	0.0580831	0.293734
MET.cysteine	DEV.CotPaveArea	-0.169336	0.155025	0.484189
MET.dehydroascorbate	DEV.CotPaveArea	0.0543009	0.648191	0.87428
MET.erythritol	DEV.CotPaveArea	0.00394915	0.973548	0.991008
MET.fa16_0	DEV.CotPaveArea	0.112119	0.344969	0.690281
MET.fa18_0	DEV.CotPaveArea	0.169011	0.152884	0.481374
MET.fa18_2	DEV.CotPaveArea	0.070389	0.559688	0.830237
MET.fructose	DEV.CotPaveArea	0.0903369	0.447211	0.763355
MET.fructose_6p	DEV.CotPaveArea	-0.215723	0.0668072	0.317473
MET.fucose	DEV.CotPaveArea	0.0322267	0.789626	0.930837
MET.fumarate	DEV.CotPaveArea	0.0541514	0.651428	0.875689
MET.gaba	DEV.CotPaveArea	0.103449	0.383778	0.720862
MET.galactose	DEV.CotPaveArea	0.0252376	0.832152	0.945093
MET.galacturonate	DEV.CotPaveArea	0.173855	0.141288	0.4636
MET.gluconate	DEV.CotPaveArea	-0.0857399	0.470757	0.778114
MET.glucose	DEV.CotPaveArea	0.144699	0.221929	0.570343
MET.glucose_6p	DEV.CotPaveArea	-0.211156	0.0729312	0.332019
MET.glutamate	DEV.CotPaveArea	0.00758891	0.949553	0.984631
MET.glutamine	DEV.CotPaveArea	0.083376	0.495803	0.793911
MET.glycerate	DEV.CotPaveArea	-0.232938	0.0473396	0.259715
MET.glycerate_3p	DEV.CotPaveArea	0.0429391	0.732101	0.910608
MET.glycerol	DEV.CotPaveArea	0.0569752	0.636967	0.86926
MET.glycerol_1p	DEV.CotPaveArea	-0.10709	0.367173	0.707701
MET.glycine	DEV.CotPaveArea	0.0222448	0.851815	0.951774
MET.homoserine	DEV.CotPaveArea	-0.0421449	0.723318	0.907014
MET.inositol	DEV.CotPaveArea	0.0405405	0.73345	0.910992
MET.inositol_1p	DEV.CotPaveArea	-0.184685	0.117771	0.424491
MET.isocitrate	DEV.CotPaveArea	0.127854	0.281051	0.63162
MET.isoleucine	DEV.CotPaveArea	-0.0138837	0.907192	0.970742
MET.isomaltose	DEV.CotPaveArea	-0.251844	0.0341166	0.21469
MET.l_ascorbate	DEV.CotPaveArea	0.156473	0.189324	0.532283
MET.leucine	DEV.CotPaveArea	-0.183265	0.120669	0.429859
MET.lysine	DEV.CotPaveArea	-0.103048	0.385635	0.721697
MET.malate	DEV.CotPaveArea	0.113816	0.33767	0.68323
MET.maleate	DEV.CotPaveArea	0.094362	0.444026	0.76153
MET.maltitol	DEV.CotPaveArea	-0.0762063	0.521651	0.808496
MET.maltose	DEV.CotPaveArea	-0.027243	0.819033	0.940763
MET.mannitol	DEV.CotPaveArea	-0.224838	0.0575894	0.292083
MET.mannose	DEV.CotPaveArea	0.118382	0.318516	0.668918
MET.methionine	DEV.CotPaveArea	-0.161113	0.17329	0.51013
MET.oxoproline_5	DEV.CotPaveArea	0.0721637	0.564743	0.832338
MET.phenylalanine	DEV.CotPaveArea	0.0412502	0.728963	0.909447
MET.phosphate	DEV.CotPaveArea	0.0494261	0.67795	0.887204
MET.proline	DEV.CotPaveArea	0.0757127	0.52436	0.810467
MET.putrescine	DEV.CotPaveArea	-0.0497347	0.676051	0.886586
MET.quinate	DEV.CotPaveArea	0.192336	0.103055	0.396483
MET.rhamnose	DEV.CotPaveArea	-0.14001	0.237433	0.586991
MET.ribose	DEV.CotPaveArea	-0.175151	0.138301	0.459409
MET.s_me_cysteine	DEV.CotPaveArea	-0.157245	0.187123	0.528807
MET.saccharate	DEV.CotPaveArea	-0.102555	0.387927	0.723154
MET.serine	DEV.CotPaveArea	0.0184808	0.876673	0.959704
MET.shikimate	DEV.CotPaveArea	0.0296912	0.807235	0.936182
MET.sorbitol	DEV.CotPaveArea	-0.073188	0.541218	0.820138
MET.succinate	DEV.CotPaveArea	-0.0356349	0.764707	0.921411
MET.sucrose	DEV.CotPaveArea	0.138714	0.241846	0.592402
MET.t4_ho_proline	DEV.CotPaveArea	-0.113778	0.348323	0.693126
MET.threonate	DEV.CotPaveArea	-0.178483	0.130839	0.446934
MET.threonine	DEV.CotPaveArea	0.047359	0.690722	0.893342
MET.trehalose	DEV.CotPaveArea	0.108447	0.361095	0.702887
MET.tryptophan	DEV.CotPaveArea	-0.0730902	0.538867	0.818752
MET.tyrosine	DEV.CotPaveArea	-0.0404171	0.734231	0.91102
MET.uracil	DEV.CotPaveArea	0.115442	0.334223	0.68058
MET.valine	DEV.CotPaveArea	-0.0902752	0.447523	0.76353
MOR.Anther_L_W	DEV.CotPaveArea	0.143225	0.23005	0.579333
MOR.Anther_length	DEV.CotPaveArea	0.110489	0.355508	0.699264
MOR.Anther_width	DEV.CotPaveArea	-0.100199	0.40234	0.733318
MOR.BM	DEV.CotPaveArea	0.188951	0.111925	0.413972
MOR.BX	DEV.CotPaveArea	0.0771111	0.519694	0.807488
MOR.BY	DEV.CotPaveArea	0.169207	0.155343	0.484641
MOR.EA	DEV.CotPaveArea	-0.145866	0.221479	0.570156
MOR.flowers_inf	DEV.CotPaveArea	-0.133556	0.288856	0.640455
MOR.flowers_plant	DEV.CotPaveArea	0.23785	0.0564073	0.288944
MOR.FN	DEV.CotPaveArea	0.216991	0.0671169	0.318566
MOR.Fruit_L_Pt	DEV.CotPaveArea	-0.0601646	0.615643	0.858316
MOR.Fruit_L_W	DEV.CotPaveArea	0.087369	0.465529	0.774676
MOR.Fruit_length	DEV.CotPaveArea	-0.108624	0.363736	0.705036
MOR.Fruit_locule	DEV.CotPaveArea	-0.222396	0.0604288	0.301186
MOR.Fruit_peric_thick	DEV.CotPaveArea	-0.100521	0.400823	0.732579
MOR.Fruit_W_Pt	DEV.CotPaveArea	-0.0622548	0.603406	0.852385
MOR.Fruit_width	DEV.CotPaveArea	-0.0810342	0.49861	0.795036
MOR.FW	DEV.CotPaveArea	-0.131295	0.271619	0.622572
MOR.HI	DEV.CotPaveArea	-0.0535083	0.655304	0.877145
MOR.inf	DEV.CotPaveArea	0.316359	0.0102469	0.0979335
MOR.Ovary_L_W	DEV.CotPaveArea	0.0996206	0.405077	0.73485
MOR.Ovary_length	DEV.CotPaveArea	0.118657	0.320841	0.670349
MOR.Ovary_width	DEV.CotPaveArea	0.0365618	0.760435	0.919585
MOR.PW	DEV.CotPaveArea	0.182938	0.124018	0.435825
MOR.RED	DEV.CotPaveArea	0.192102	0.105962	0.4023
MOR.Seed_L_W	DEV.CotPaveArea	-0.16284	0.171718	0.507587
MOR.Seed_Length	DEV.CotPaveArea	-0.0388665	0.747601	0.915748
MOR.Seed_Width	DEV.CotPaveArea	-0.0450511	0.707086	0.900565
MOR.Seed_Wt	DEV.CotPaveArea	0.0357258	0.765754	0.921961
MOR.SN_fruit	DEV.CotPaveArea	0.0239887	0.841467	0.949273
MOR.SN_fruit_unit	DEV.CotPaveArea	0.00520934	0.965359	0.988982
MOR.SN_plant	DEV.CotPaveArea	0.137179	0.250525	0.600088
MOR.Style_L_W	DEV.CotPaveArea	0.107917	0.366888	0.707418
MOR.Style_length	DEV.CotPaveArea	0.0830922	0.487731	0.787704
MOR.Style_width	DEV.CotPaveArea	-0.00926105	0.938457	0.981352
MOR.SW_fruit	DEV.CotPaveArea	0.0701974	0.557913	0.828911
MOR.SW_plant	DEV.CotPaveArea	0.150653	0.206524	0.553222
MOR.TY	DEV.CotPaveArea	0.206669	0.0815411	0.351802
SED.Adenine_seeds	DEV.CotPaveArea	-0.113986	0.36594	0.706596
SED.Alanine_seeds	DEV.CotPaveArea	-0.0159289	0.895107	0.966881
SED.Arginine_seeds	DEV.CotPaveArea	-0.120959	0.314982	0.665517
SED.Asparagine_seeds	DEV.CotPaveArea	-0.0239437	0.842888	0.949756
SED.Aspartate_seeds	DEV.CotPaveArea	-0.0293763	0.80786	0.936515
SED.Benzoate_seeds	DEV.CotPaveArea	0.0454058	0.706918	0.900545
SED.Citrate_seeds	DEV.CotPaveArea	-0.153286	0.201869	0.547806
SED.Erythritol_seeds	DEV.CotPaveArea	0.084943	0.481238	0.783487
SED.Fructose_seeds	DEV.CotPaveArea	-0.129678	0.2811	0.63168
SED.Fumarate_seeds	DEV.CotPaveArea	0.0140174	0.907635	0.970742
SED.GABA_seeds	DEV.CotPaveArea	0.0146881	0.903236	0.969376
SED.Galactinol_seeds	DEV.CotPaveArea	-0.291696	0.0183926	0.145425
SED.Galactonic_acid_1_4_lactone_seeds	DEV.CotPaveArea	-0.0855466	0.478116	0.782028
SED.Glutamate_seeds	DEV.CotPaveArea	0.158652	0.18634	0.528101
SED.Glycerate_seeds	DEV.CotPaveArea	0.149396	0.213689	0.5615
SED.Glycerol_1P_seeds	DEV.CotPaveArea	0.0571429	0.635974	0.868907
SED.Glycerol_seeds	DEV.CotPaveArea	0.0873575	0.468815	0.776895
SED.Glycine_seeds	DEV.CotPaveArea	-0.066063	0.584121	0.843037
SED.Glycolate_seeds	DEV.CotPaveArea	-0.122472	0.32726	0.67459
SED.Isoleucine_seeds	DEV.CotPaveArea	-0.112643	0.349646	0.693825
SED.Lysine_seeds	DEV.CotPaveArea	-0.141784	0.238216	0.58794
SED.Malate_seeds	DEV.CotPaveArea	0.0845406	0.483326	0.784486
SED.Maltotriose_seeds	DEV.CotPaveArea	0.189117	0.131355	0.447713
SED.Melezitose_seeds	DEV.CotPaveArea	-0.0267606	0.824683	0.942589
SED.Myo_Inositol_seeds	DEV.CotPaveArea	-0.110362	0.359549	0.701489
SED.NA_sugar_seeds	DEV.CotPaveArea	-0.0809188	0.502327	0.79737
SED.Nicotinate_seeds	DEV.CotPaveArea	0.121136	0.332605	0.679546
SED.Nonanoate_seeds	DEV.CotPaveArea	0.172159	0.170274	0.505496
SED.Octadecanoate_seeds	DEV.CotPaveArea	-0.124245	0.301915	0.653208
SED.Phenylalanine_seeds	DEV.CotPaveArea	-0.0799463	0.507494	0.800749
SED.Phosphate_seeds	DEV.CotPaveArea	-0.0423541	0.72581	0.90803
SED.Proline_seeds	DEV.CotPaveArea	-0.078169	0.517008	0.806034
SED.Putrescine_seeds	DEV.CotPaveArea	0.100503	0.404317	0.734632
SED.Raffinose_seeds	DEV.CotPaveArea	0.0240778	0.84202	0.949573
SED.Salicylate_seeds	DEV.CotPaveArea	0.00539906	0.964358	0.988758
SED.Serine_seeds	DEV.CotPaveArea	-0.146211	0.223728	0.57244
SED.Succinate_seeds	DEV.CotPaveArea	0.00323427	0.979601	0.992967
SED.Threonine_seeds	DEV.CotPaveArea	-0.0491281	0.684112	0.890393
SED.Trehalose_alpha_alpha_seeds	DEV.CotPaveArea	0.100678	0.421204	0.746097
SED.Tyrosine_seeds	DEV.CotPaveArea	-0.0375922	0.755614	0.918018
SED.Uracil_seeds	DEV.CotPaveArea	-0.0714598	0.571616	0.836297
SED.Urea_seeds	DEV.CotPaveArea	0.0168679	0.888962	0.965164
SED.Valine_seeds	DEV.CotPaveArea	-0.136486	0.256394	0.606389
SED.X4_Hydroxy_Benzoate_seeds	DEV.CotPaveArea	0.22894	0.054803	0.284219
WAX.anteiso_ACL	DEV.CotPaveArea	-0.111178	0.363105	0.704299
WAX.anteiso_CPI	DEV.CotPaveArea	0.186038	0.125891	0.439227
WAX.eps_iC31	DEV.CotPaveArea	-0.0545853	0.655981	0.877264
WAX.eps_nC31	DEV.CotPaveArea	-0.0421995	0.730632	0.910432
WAX.eps_iC33	DEV.CotPaveArea	-0.0660577	0.589692	0.846073
WAX.eps_nC33	DEV.CotPaveArea	-0.0222159	0.856218	0.953406
WAX.n31.i31	DEV.CotPaveArea	-0.0321328	0.793239	0.93209
WAX.n33.i33	DEV.CotPaveArea	0.0821542	0.502161	0.797243
WAX.iso_ACL	DEV.CotPaveArea	0.0933243	0.445633	0.762557
WAX.iso_CPI	DEV.CotPaveArea	-0.295908	0.0135625	0.118974
WAX.mindex	DEV.CotPaveArea	-0.0379999	0.756564	0.918493
WAX.nalk_ACL	DEV.CotPaveArea	0.0179699	0.883484	0.962093
WAX.nalk_CPI	DEV.CotPaveArea	-0.200621	0.098353	0.388165
WAX.pct_iso	DEV.CotPaveArea	-0.04673	0.702991	0.898641
WAX.pct_anteiso	DEV.CotPaveArea	-0.0746803	0.541954	0.820565
DEV.CompAll	DEV.CotPaveCirc	-0.175953	0.136476	0.456378
DEV.CompInt	DEV.CotPaveCirc	-0.161514	0.172208	0.508605
DEV.CompPri	DEV.CotPaveCirc	-0.0480995	0.686137	0.89126
DEV.CompRachis	DEV.CotPaveCirc	-0.145995	0.217773	0.566693
DEV.CompSec	DEV.CotPaveCirc	-0.166883	0.158199	0.488668
DEV.CotPaveAR	DEV.CotPaveCirc	-0.144298	0.223227	0.57189
DEV.CotPaveArea	DEV.CotPaveCirc	-0.203166	0.0847231	0.358258
DEV.CotPaveCirc	DEV.CotPaveCirc	1	NA	NA
DEV.CotPaveCnt	DEV.CotPaveCirc	0.217574	0.0644456	0.312138
DEV.CotPaveRound	DEV.CotPaveCirc	0.149451	0.206959	0.553753
DEV.CotPaveSolid	DEV.CotPaveCirc	-0.961743	0	0
DEV.CotStom	DEV.CotPaveCirc	0.116503	0.326313	0.67378
DEV.CotStomInd	DEV.CotPaveCirc	-0.13967	0.238583	0.588327
DEV.FlowTime	DEV.CotPaveCirc	-0.236012	0.0545117	0.283238
DEV.LatLfSize	DEV.CotPaveCirc	-0.0588979	0.620622	0.860544
DEV.LatPC1	DEV.CotPaveCirc	-0.121314	0.306592	0.657934
DEV.LatPC2	DEV.CotPaveCirc	0.0235715	0.843087	0.949756
DEV.LatPC3	DEV.CotPaveCirc	-0.0126188	0.915615	0.973656
DEV.LatPC4	DEV.CotPaveCirc	0.0579415	0.626317	0.863687
DEV.LatPC5	DEV.CotPaveCirc	-0.116747	0.325293	0.673126
DEV.LfAbStom	DEV.CotPaveCirc	-0.134302	0.257293	0.607672
DEV.LfAdStom	DEV.CotPaveCirc	-0.218962	0.0627191	0.307288
DEV.LfStomRatio	DEV.CotPaveCirc	0.216525	0.0657754	0.314763
DEV.LftAR	DEV.CotPaveCirc	-0.0285697	0.810381	0.937538
DEV.LftCirc	DEV.CotPaveCirc	0.166204	0.159922	0.490986
DEV.LftRound	DEV.CotPaveCirc	0.0252684	0.83195	0.945039
DEV.LftSolid	DEV.CotPaveCirc	-0.203135	0.0847714	0.358341
DEV.TermLfSize	DEV.CotPaveCirc	-0.0490251	0.680421	0.888567
DEV.TermPC1	DEV.CotPaveCirc	-0.0809268	0.49611	0.794052
DEV.TermPC3	DEV.CotPaveCirc	-0.0837961	0.480911	0.783487
DEV.TermPC4	DEV.CotPaveCirc	0.0841046	0.479291	0.782707
DEV.TermPC5	DEV.CotPaveCirc	-0.169937	0.150616	0.477998
ENZ.aa_cont	DEV.CotPaveCirc	-0.0660866	0.578548	0.840023
ENZ.ac_inv	DEV.CotPaveCirc	0.0659632	0.579259	0.840341
ENZ.aconi	DEV.CotPaveCirc	-0.0273047	0.81863	0.940666
ENZ.agpa	DEV.CotPaveCirc	-0.0810663	0.49844	0.794923
ENZ.ala_ami	DEV.CotPaveCirc	-0.0344008	0.772632	0.925015
ENZ.asp_ami	DEV.CotPaveCirc	-0.0940392	0.428734	0.751487
ENZ.fbp_ald	DEV.CotPaveCirc	-0.0995927	0.40185	0.73313
ENZ.fru_kin	DEV.CotPaveCirc	-0.0580032	0.625949	0.863632
ENZ.fructose_e	DEV.CotPaveCirc	-0.0729051	0.539898	0.81929
ENZ.fuma	DEV.CotPaveCirc	0.0901344	0.451471	0.765975
ENZ.g6pdh	DEV.CotPaveCirc	-0.0275824	0.816817	0.940052
ENZ.gadph	DEV.CotPaveCirc	-0.0965692	0.416362	0.742838
ENZ.gapdh_p	DEV.CotPaveCirc	-0.0581266	0.625213	0.863229
ENZ.gluc_kin	DEV.CotPaveCirc	-0.24784	0.0345063	0.215793
ENZ.glucose_e	DEV.CotPaveCirc	-0.130631	0.270647	0.621575
ENZ.gluta_dh	DEV.CotPaveCirc	0.0625694	0.59897	0.849897
ENZ.iso_ci_dh	DEV.CotPaveCirc	0.0922806	0.437456	0.756439
ENZ.mal_dh	DEV.CotPaveCirc	-0.106411	0.370235	0.710534
ENZ.pep_car	DEV.CotPaveCirc	-0.0883315	0.457401	0.769558
ENZ.ph_fru_kin	DEV.CotPaveCirc	-0.149297	0.207434	0.554227
ENZ.ph_fru_kin_a	DEV.CotPaveCirc	-0.0656238	0.581217	0.841582
ENZ.ph_glu_is_c	DEV.CotPaveCirc	-0.0903986	0.446899	0.763328
ENZ.ph_glu_is_t	DEV.CotPaveCirc	-0.0503209	0.672449	0.884767
ENZ.ph_glu_mut	DEV.CotPaveCirc	-0.170369	0.149565	0.476395
ENZ.ph_gly_kin	DEV.CotPaveCirc	-0.0530668	0.655676	0.877264
ENZ.pro_con	DEV.CotPaveCirc	-0.112304	0.344168	0.689803
ENZ.pyr_kin	DEV.CotPaveCirc	-0.192552	0.102662	0.395629
ENZ.shik_de	DEV.CotPaveCirc	-0.123658	0.29727	0.649146
ENZ.starch	DEV.CotPaveCirc	0.0582588	0.626893	0.864099
ENZ.suc_p_syn	DEV.CotPaveCirc	-0.00299272	0.979952	0.993019
ENZ.suc_syn	DEV.CotPaveCirc	0.137326	0.246636	0.596354
ENZ.succ_co_l	DEV.CotPaveCirc	0.0947774	0.435129	0.755466
ENZ.sucrose_e	DEV.CotPaveCirc	-0.206775	0.0792219	0.346771
ENZ.tr_ph_iso	DEV.CotPaveCirc	-0.0404788	0.73384	0.91102
ENZ.udp_glu	DEV.CotPaveCirc	-0.170801	0.148521	0.475123
MET.a_tocopherol	DEV.CotPaveCirc	0.012156	0.9187	0.974561
MET.aconitate	DEV.CotPaveCirc	0.035299	0.77842	0.925998
MET.alanine	DEV.CotPaveCirc	0.0495804	0.677	0.886825
MET.arabinose	DEV.CotPaveCirc	0.115526	0.337366	0.682888
MET.arginine	DEV.CotPaveCirc	-0.0454048	0.704892	0.899562
MET.asparagine	DEV.CotPaveCirc	0.144144	0.223727	0.57244
MET.aspartate	DEV.CotPaveCirc	-0.101475	0.39297	0.727697
MET.b_alanine	DEV.CotPaveCirc	0.0758978	0.523343	0.809906
MET.benzoate	DEV.CotPaveCirc	0.103093	0.388816	0.724219
MET.citramalate	DEV.CotPaveCirc	-0.101197	0.394272	0.727986
MET.citrate	DEV.CotPaveCirc	0.0884549	0.45677	0.769558
MET.cysteine	DEV.CotPaveCirc	0.00665638	0.955745	0.985721
MET.dehydroascorbate	DEV.CotPaveCirc	-0.179594	0.128421	0.443483
MET.erythritol	DEV.CotPaveCirc	0.083827	0.480749	0.78342
MET.fa16_0	DEV.CotPaveCirc	0.0135752	0.909246	0.971336
MET.fa18_0	DEV.CotPaveCirc	-0.0466185	0.695319	0.894779
MET.fa18_2	DEV.CotPaveCirc	-0.0366533	0.761535	0.920116
MET.fructose	DEV.CotPaveCirc	-0.0195915	0.869325	0.956787
MET.fructose_6p	DEV.CotPaveCirc	-0.00382574	0.974374	0.991073
MET.fucose	DEV.CotPaveCirc	0.0164655	0.891594	0.965865
MET.fumarate	DEV.CotPaveCirc	-0.0435076	0.716691	0.904601
MET.gaba	DEV.CotPaveCirc	0.0380723	0.749126	0.915969
MET.galactose	DEV.CotPaveCirc	-0.131649	0.266898	0.61793
MET.galacturonate	DEV.CotPaveCirc	0.00851536	0.942999	0.982812
MET.gluconate	DEV.CotPaveCirc	-0.00953351	0.936197	0.980724
MET.glucose	DEV.CotPaveCirc	-0.0152413	0.898164	0.967866
MET.glucose_6p	DEV.CotPaveCirc	0.028508	0.810782	0.937576
MET.glutamate	DEV.CotPaveCirc	-0.089845	0.452931	0.767067
MET.glutamine	DEV.CotPaveCirc	-0.0293752	0.810638	0.937549
MET.glycerate	DEV.CotPaveCirc	0.0382574	0.747947	0.915748
MET.glycerate_3p	DEV.CotPaveCirc	-0.0997182	0.425669	0.749265
MET.glycerol	DEV.CotPaveCirc	-0.0489604	0.685133	0.890775
MET.glycerol_1p	DEV.CotPaveCirc	-0.0789831	0.506547	0.799938
MET.glycine	DEV.CotPaveCirc	0.174102	0.140716	0.462644
MET.homoserine	DEV.CotPaveCirc	0.247069	0.0350905	0.21793
MET.inositol	DEV.CotPaveCirc	0.031007	0.794544	0.932336
MET.inositol_1p	DEV.CotPaveCirc	0.133562	0.259949	0.610173
MET.isocitrate	DEV.CotPaveCirc	-0.0577255	0.627606	0.864484
MET.isoleucine	DEV.CotPaveCirc	0.0682155	0.566345	0.833381
MET.isomaltose	DEV.CotPaveCirc	0.184675	0.123129	0.434229
MET.l_ascorbate	DEV.CotPaveCirc	0.0030227	0.979896	0.993019
MET.leucine	DEV.CotPaveCirc	0.0919721	0.438996	0.757562
MET.lysine	DEV.CotPaveCirc	-0.0453844	0.703004	0.898641
MET.malate	DEV.CotPaveCirc	-0.000123411	0.999173	0.999745
MET.maleate	DEV.CotPaveCirc	0.0592816	0.631079	0.866409
MET.maltitol	DEV.CotPaveCirc	-0.0129273	0.91356	0.972866
MET.maltose	DEV.CotPaveCirc	0.0316241	0.790548	0.930961
MET.mannitol	DEV.CotPaveCirc	0.0826098	0.49027	0.789705
MET.mannose	DEV.CotPaveCirc	-0.0461866	0.698005	0.896241
MET.methionine	DEV.CotPaveCirc	0.159169	0.178604	0.518155
MET.oxoproline_5	DEV.CotPaveCirc	-0.116919	0.349831	0.69395
MET.phenylalanine	DEV.CotPaveCirc	-0.216864	0.0653428	0.313713
MET.phosphate	DEV.CotPaveCirc	-0.029958	0.80135	0.934318
MET.proline	DEV.CotPaveCirc	-0.143897	0.224529	0.573337
MET.putrescine	DEV.CotPaveCirc	0.138899	0.241212	0.591783
MET.quinate	DEV.CotPaveCirc	0.0993151	0.403171	0.733672
MET.rhamnose	DEV.CotPaveCirc	0.212452	0.0711493	0.327913
MET.ribose	DEV.CotPaveCirc	0.0550413	0.643717	0.87205
MET.s_me_cysteine	DEV.CotPaveCirc	0.110715	0.354523	0.698357
MET.saccharate	DEV.CotPaveCirc	0.332223	0.00408447	0.0513789
MET.serine	DEV.CotPaveCirc	0.0729359	0.539726	0.81929
MET.shikimate	DEV.CotPaveCirc	0.112834	0.352366	0.696464
MET.sorbitol	DEV.CotPaveCirc	0.00578815	0.961513	0.987937
MET.succinate	DEV.CotPaveCirc	-0.160311	0.175469	0.513088
MET.sucrose	DEV.CotPaveCirc	-0.0468654	0.693785	0.894409
MET.t4_ho_proline	DEV.CotPaveCirc	0.139498	0.249424	0.599106
MET.threonate	DEV.CotPaveCirc	-0.0216586	0.855678	0.953406
MET.threonine	DEV.CotPaveCirc	0.0639269	0.59105	0.846352
MET.trehalose	DEV.CotPaveCirc	0.0995619	0.401997	0.733302
MET.tryptophan	DEV.CotPaveCirc	-0.0466494	0.695127	0.894779
MET.tyrosine	DEV.CotPaveCirc	0.00487474	0.967351	0.989532
MET.uracil	DEV.CotPaveCirc	-0.114252	0.339262	0.684693
MET.valine	DEV.CotPaveCirc	0.150376	0.204129	0.550351
MOR.Anther_L_W	DEV.CotPaveCirc	-0.0156923	0.895909	0.96726
MOR.Anther_length	DEV.CotPaveCirc	-0.0336678	0.778894	0.926011
MOR.Anther_width	DEV.CotPaveCirc	0.0263361	0.826186	0.942758
MOR.BM	DEV.CotPaveCirc	-0.211814	0.0740709	0.33481
MOR.BX	DEV.CotPaveCirc	-0.0487813	0.684066	0.890375
MOR.BY	DEV.CotPaveCirc	-0.222104	0.0607751	0.301943
MOR.EA	DEV.CotPaveCirc	0.0193266	0.871986	0.957992
MOR.flowers_inf	DEV.CotPaveCirc	-0.0145432	0.90846	0.971065
MOR.flowers_plant	DEV.CotPaveCirc	-0.174432	0.164618	0.497933
MOR.FN	DEV.CotPaveCirc	-0.175735	0.139788	0.461495
MOR.Fruit_L_Pt	DEV.CotPaveCirc	-0.0248247	0.836017	0.946791
MOR.Fruit_L_W	DEV.CotPaveCirc	0.101614	0.395694	0.729176
MOR.Fruit_length	DEV.CotPaveCirc	-0.118175	0.322826	0.671422
MOR.Fruit_locule	DEV.CotPaveCirc	0.0456118	0.703609	0.898992
MOR.Fruit_peric_thick	DEV.CotPaveCirc	-0.117725	0.324686	0.672541
MOR.Fruit_W_Pt	DEV.CotPaveCirc	-0.0499711	0.676782	0.886796
MOR.Fruit_width	DEV.CotPaveCirc	-0.0554055	0.643896	0.87205
MOR.FW	DEV.CotPaveCirc	-0.0606791	0.612621	0.857159
MOR.HI	DEV.CotPaveCirc	0.0409673	0.732593	0.910888
MOR.inf	DEV.CotPaveCirc	-0.199628	0.110864	0.412326
MOR.Ovary_L_W	DEV.CotPaveCirc	0.020355	0.865236	0.95578
MOR.Ovary_length	DEV.CotPaveCirc	-0.174738	0.142085	0.464374
MOR.Ovary_width	DEV.CotPaveCirc	-0.0982057	0.411814	0.739536
MOR.PW	DEV.CotPaveCirc	-0.126761	0.288662	0.640337
MOR.RED	DEV.CotPaveCirc	-0.201621	0.0894406	0.368527
MOR.Seed_L_W	DEV.CotPaveCirc	0.220014	0.0633063	0.30864
MOR.Seed_Length	DEV.CotPaveCirc	0.000167673	0.998893	0.999723
MOR.Seed_Width	DEV.CotPaveCirc	0.0590713	0.622087	0.861788
MOR.Seed_Wt	DEV.CotPaveCirc	-0.0557592	0.641778	0.871308
MOR.SN_fruit	DEV.CotPaveCirc	-0.0729629	0.542466	0.820607
MOR.SN_fruit_unit	DEV.CotPaveCirc	-0.0581709	0.627414	0.864405
MOR.SN_plant	DEV.CotPaveCirc	-0.167053	0.160749	0.492388
MOR.Style_L_W	DEV.CotPaveCirc	-0.135057	0.258	0.608364
MOR.Style_length	DEV.CotPaveCirc	-0.0331854	0.781983	0.927475
MOR.Style_width	DEV.CotPaveCirc	0.00672069	0.955318	0.985721
MOR.SW_fruit	DEV.CotPaveCirc	-0.0812914	0.497244	0.794351
MOR.SW_plant	DEV.CotPaveCirc	-0.140877	0.237857	0.587492
MOR.TY	DEV.CotPaveCirc	-0.205319	0.0835979	0.356205
SED.Adenine_seeds	DEV.CotPaveCirc	-0.00913462	0.942428	0.982522
SED.Alanine_seeds	DEV.CotPaveCirc	0.0444668	0.712713	0.903001
SED.Arginine_seeds	DEV.CotPaveCirc	-0.0128437	0.915339	0.973544
SED.Asparagine_seeds	DEV.CotPaveCirc	0.132763	0.269714	0.620729
SED.Aspartate_seeds	DEV.CotPaveCirc	-0.0361502	0.764712	0.921411
SED.Benzoate_seeds	DEV.CotPaveCirc	-0.163112	0.174105	0.511343
SED.Citrate_seeds	DEV.CotPaveCirc	0.0172703	0.88633	0.963616
SED.Erythritol_seeds	DEV.CotPaveCirc	0.0304494	0.800983	0.934303
SED.Fructose_seeds	DEV.CotPaveCirc	0.0263917	0.827062	0.943096
SED.Fumarate_seeds	DEV.CotPaveCirc	-0.0818578	0.497364	0.794498
SED.GABA_seeds	DEV.CotPaveCirc	-0.0161636	0.89357	0.966528
SED.Galactinol_seeds	DEV.CotPaveCirc	0.00961538	0.939404	0.981411
SED.Galactonic_acid_1_4_lactone_seeds	DEV.CotPaveCirc	0.0984909	0.413838	0.740839
SED.Glutamate_seeds	DEV.CotPaveCirc	-0.0557344	0.644333	0.872061
SED.Glycerate_seeds	DEV.CotPaveCirc	-0.0573441	0.634784	0.868458
SED.Glycerol_1P_seeds	DEV.CotPaveCirc	-0.0931925	0.439522	0.757904
SED.Glycerol_seeds	DEV.CotPaveCirc	-0.0355801	0.768318	0.922853
SED.Glycine_seeds	DEV.CotPaveCirc	0.0716968	0.552398	0.825932
SED.Glycolate_seeds	DEV.CotPaveCirc	0.0409769	0.743914	0.914705
SED.Isoleucine_seeds	DEV.CotPaveCirc	-0.00429242	0.97166	0.990683
SED.Lysine_seeds	DEV.CotPaveCirc	0.0128773	0.915119	0.973495
SED.Malate_seeds	DEV.CotPaveCirc	0.00523139	0.965464	0.988982
SED.Maltotriose_seeds	DEV.CotPaveCirc	-0.066215	0.600237	0.850452
SED.Melezitose_seeds	DEV.CotPaveCirc	-0.0704896	0.559126	0.829643
SED.Myo_Inositol_seeds	DEV.CotPaveCirc	-0.0136486	0.910055	0.971611
SED.NA_sugar_seeds	DEV.CotPaveCirc	-0.0540241	0.654541	0.87681
SED.Nicotinate_seeds	DEV.CotPaveCirc	-0.0972967	0.437049	0.756334
SED.Nonanoate_seeds	DEV.CotPaveCirc	-0.101049	0.423173	0.747691
SED.Octadecanoate_seeds	DEV.CotPaveCirc	0.195372	0.102513	0.395376
SED.Phenylalanine_seeds	DEV.CotPaveCirc	-0.0218645	0.856379	0.953406
SED.Phosphate_seeds	DEV.CotPaveCirc	-0.0248491	0.837027	0.946942
SED.Proline_seeds	DEV.CotPaveCirc	-0.0530181	0.660576	0.87928
SED.Putrescine_seeds	DEV.CotPaveCirc	-0.0404427	0.737728	0.912358
SED.Raffinose_seeds	DEV.CotPaveCirc	-0.157478	0.189661	0.532888
SED.Salicylate_seeds	DEV.CotPaveCirc	0.0245137	0.839197	0.948357
SED.Serine_seeds	DEV.CotPaveCirc	0.072334	0.548863	0.823825
SED.Succinate_seeds	DEV.CotPaveCirc	-0.282867	0.0224219	0.165362
SED.Threonine_seeds	DEV.CotPaveCirc	0.0171026	0.887426	0.964096
SED.Trehalose_alpha_alpha_seeds	DEV.CotPaveCirc	0.0170963	0.891626	0.965865
SED.Tyrosine_seeds	DEV.CotPaveCirc	0.0101274	0.933197	0.979429
SED.Uracil_seeds	DEV.CotPaveCirc	-0.123033	0.328869	0.676609
SED.Urea_seeds	DEV.CotPaveCirc	-0.0381623	0.752026	0.917042
SED.Valine_seeds	DEV.CotPaveCirc	0.00871898	0.942471	0.982522
SED.X4_Hydroxy_Benzoate_seeds	DEV.CotPaveCirc	-0.104728	0.384745	0.721165
WAX.anteiso_ACL	DEV.CotPaveCirc	-0.1411	0.247496	0.597555
WAX.anteiso_CPI	DEV.CotPaveCirc	-0.039488	0.747343	0.915729
WAX.eps_iC31	DEV.CotPaveCirc	-0.0275119	0.822447	0.942099
WAX.eps_nC31	DEV.CotPaveCirc	-0.0723054	0.554912	0.827405
WAX.eps_iC33	DEV.CotPaveCirc	-0.0424187	0.729286	0.909729
WAX.eps_nC33	DEV.CotPaveCirc	-0.0735355	0.548182	0.823354
WAX.n31.i31	DEV.CotPaveCirc	0.0834575	0.495381	0.793642
WAX.n33.i33	DEV.CotPaveCirc	-0.0950702	0.437131	0.756334
WAX.iso_ACL	DEV.CotPaveCirc	-0.0616189	0.614983	0.858001
WAX.iso_CPI	DEV.CotPaveCirc	0.0440263	0.719443	0.905248
WAX.mindex	DEV.CotPaveCirc	0.028573	0.815717	0.939761
WAX.nalk_ACL	DEV.CotPaveCirc	-0.155366	0.202398	0.548103
WAX.nalk_CPI	DEV.CotPaveCirc	0.0814395	0.5059	0.799198
WAX.pct_iso	DEV.CotPaveCirc	-0.0660577	0.589692	0.846073
WAX.pct_anteiso	DEV.CotPaveCirc	0.146365	0.230116	0.579333
DEV.CompAll	DEV.CotPaveCnt	-0.223282	0.0575856	0.292083
DEV.CompInt	DEV.CotPaveCnt	-0.196872	0.0950341	0.3812
DEV.CompPri	DEV.CotPaveCnt	-0.1476	0.212704	0.56031
DEV.CompRachis	DEV.CotPaveCnt	-0.208349	0.0769146	0.341278
DEV.CompSec	DEV.CotPaveCnt	-0.186814	0.113523	0.417124
DEV.CotPaveAR	DEV.CotPaveCnt	0.00802172	0.946299	0.983683
DEV.CotPaveArea	DEV.CotPaveCnt	-0.917037	0	0
DEV.CotPaveCirc	DEV.CotPaveCnt	0.217574	0.0644456	0.312138
DEV.CotPaveCnt	DEV.CotPaveCnt	1	NA	NA
DEV.CotPaveRound	DEV.CotPaveCnt	0.00691102	0.953725	0.98561
DEV.CotPaveSolid	DEV.CotPaveCnt	-0.166636	0.158824	0.489711
DEV.CotStom	DEV.CotPaveCnt	0.552586	4.00325e-07	2.3015e-05
DEV.CotStomInd	DEV.CotPaveCnt	-0.291867	0.0122283	0.110924
DEV.FlowTime	DEV.CotPaveCnt	-0.104318	0.400849	0.732579
DEV.LatLfSize	DEV.CotPaveCnt	-0.0401086	0.736186	0.911667
DEV.LatPC1	DEV.CotPaveCnt	-0.120404	0.310262	0.660988
DEV.LatPC2	DEV.CotPaveCnt	0.0931754	0.433006	0.753544
DEV.LatPC3	DEV.CotPaveCnt	-0.0323646	0.785759	0.929328
DEV.LatPC4	DEV.CotPaveCnt	0.0448908	0.706086	0.900032
DEV.LatPC5	DEV.CotPaveCnt	-0.225194	0.0554242	0.286135
DEV.LfAbStom	DEV.CotPaveCnt	-0.00657164	0.955995	0.985781
DEV.LfAdStom	DEV.CotPaveCnt	0.0670739	0.572874	0.836824
DEV.LfStomRatio	DEV.CotPaveCnt	-0.0900284	0.44877	0.763958
DEV.LftAR	DEV.CotPaveCnt	-0.14038	0.236182	0.586257
DEV.LftCirc	DEV.CotPaveCnt	0.260397	0.0260831	0.182149
DEV.LftRound	DEV.CotPaveCnt	0.137048	0.247602	0.597684
DEV.LftSolid	DEV.CotPaveCnt	-0.26049	0.0260282	0.181976
DEV.TermLfSize	DEV.CotPaveCnt	0.148093	0.211161	0.558261
DEV.TermPC1	DEV.CotPaveCnt	-0.141738	0.231636	0.580942
DEV.TermPC3	DEV.CotPaveCnt	0.0864495	0.467079	0.775674
DEV.TermPC4	DEV.CotPaveCnt	0.013822	0.907603	0.970742
DEV.TermPC5	DEV.CotPaveCnt	0.0411884	0.729352	0.909771
ENZ.aa_cont	DEV.CotPaveCnt	0.023047	0.846535	0.950542
ENZ.ac_inv	DEV.CotPaveCnt	0.0657164	0.580683	0.841272
ENZ.aconi	DEV.CotPaveCnt	-0.00564606	0.962188	0.98817
ENZ.agpa	DEV.CotPaveCnt	0.0856968	0.474143	0.779978
ENZ.ala_ami	DEV.CotPaveCnt	-0.0736147	0.53595	0.81696
ENZ.asp_ami	DEV.CotPaveCnt	-0.0585277	0.622824	0.86209
ENZ.fbp_ald	DEV.CotPaveCnt	0.034586	0.771442	0.924303
ENZ.fru_kin	DEV.CotPaveCnt	0.103449	0.383778	0.720862
ENZ.fructose_e	DEV.CotPaveCnt	-0.172837	0.143669	0.467102
ENZ.fuma	DEV.CotPaveCnt	0.283394	0.0158533	0.13154
ENZ.g6pdh	DEV.CotPaveCnt	-0.116099	0.328004	0.675426
ENZ.gadph	DEV.CotPaveCnt	-0.0133592	0.910684	0.971956
ENZ.gapdh_p	DEV.CotPaveCnt	0.0364371	0.759569	0.9192
ENZ.gluc_kin	DEV.CotPaveCnt	-0.227663	0.0527335	0.277416
ENZ.glucose_e	DEV.CotPaveCnt	-0.123966	0.296057	0.648218
ENZ.gluta_dh	DEV.CotPaveCnt	0.160897	0.173875	0.510993
ENZ.iso_ci_dh	DEV.CotPaveCnt	0.0614279	0.605666	0.853464
ENZ.mal_dh	DEV.CotPaveCnt	-0.0669197	0.573759	0.837242
ENZ.pep_car	DEV.CotPaveCnt	0.0239109	0.840857	0.948967
ENZ.ph_fru_kin	DEV.CotPaveCnt	-0.147229	0.213866	0.561614
ENZ.ph_fru_kin_a	DEV.CotPaveCnt	0.0408182	0.731693	0.910511
ENZ.ph_glu_is_c	DEV.CotPaveCnt	0.0747871	0.529458	0.814115
ENZ.ph_glu_is_t	DEV.CotPaveCnt	0.0436567	0.713813	0.903158
ENZ.ph_glu_mut	DEV.CotPaveCnt	-0.0290325	0.807368	0.936182
ENZ.ph_gly_kin	DEV.CotPaveCnt	-0.045045	0.705123	0.899612
ENZ.pro_con	DEV.CotPaveCnt	-0.0557201	0.639627	0.871004
ENZ.pyr_kin	DEV.CotPaveCnt	-0.0755276	0.525377	0.811214
ENZ.shik_de	DEV.CotPaveCnt	-0.0505677	0.670935	0.884272
ENZ.starch	DEV.CotPaveCnt	0.096562	0.419722	0.745124
ENZ.suc_p_syn	DEV.CotPaveCnt	-0.134919	0.255093	0.604914
ENZ.suc_syn	DEV.CotPaveCnt	0.00876219	0.94135	0.982049
ENZ.succ_co_l	DEV.CotPaveCnt	0.0288164	0.812809	0.938376
ENZ.sucrose_e	DEV.CotPaveCnt	-0.109003	0.358626	0.701277
ENZ.tr_ph_iso	DEV.CotPaveCnt	-0.0159817	0.893245	0.966525
ENZ.udp_glu	DEV.CotPaveCnt	-0.117549	0.321957	0.671278
MET.a_tocopherol	DEV.CotPaveCnt	-0.0702209	0.554962	0.827427
MET.aconitate	DEV.CotPaveCnt	-0.265379	0.0312766	0.203746
MET.alanine	DEV.CotPaveCnt	0.111132	0.34926	0.693659
MET.arabinose	DEV.CotPaveCnt	0.0785044	0.515206	0.805084
MET.arginine	DEV.CotPaveCnt	-0.051611	0.666791	0.882971
MET.asparagine	DEV.CotPaveCnt	0.188449	0.110342	0.411059
MET.aspartate	DEV.CotPaveCnt	-0.0730902	0.538867	0.818752
MET.b_alanine	DEV.CotPaveCnt	-0.128594	0.278251	0.628611
MET.benzoate	DEV.CotPaveCnt	0.0145669	0.903337	0.969406
MET.citramalate	DEV.CotPaveCnt	0.0447982	0.706665	0.900346
MET.citrate	DEV.CotPaveCnt	-0.246113	0.0358262	0.220272
MET.cysteine	DEV.CotPaveCnt	0.194096	0.102319	0.394988
MET.dehydroascorbate	DEV.CotPaveCnt	-0.0588671	0.620806	0.860628
MET.erythritol	DEV.CotPaveCnt	0.0108602	0.927341	0.977679
MET.fa16_0	DEV.CotPaveCnt	-0.07272	0.540931	0.819802
MET.fa18_0	DEV.CotPaveCnt	-0.103172	0.385063	0.721328
MET.fa18_2	DEV.CotPaveCnt	-0.091281	0.449003	0.764012
MET.fructose	DEV.CotPaveCnt	-0.0787054	0.508048	0.800895
MET.fructose_6p	DEV.CotPaveCnt	0.182093	0.123105	0.434229
MET.fucose	DEV.CotPaveCnt	-0.0495641	0.681459	0.888873
MET.fumarate	DEV.CotPaveCnt	-0.0774326	0.517949	0.806585
MET.gaba	DEV.CotPaveCnt	-0.121961	0.304	0.65515
MET.galactose	DEV.CotPaveCnt	-0.0131124	0.912327	0.972301
MET.galacturonate	DEV.CotPaveCnt	-0.150932	0.202444	0.548174
MET.gluconate	DEV.CotPaveCnt	0.124152	0.295331	0.647173
MET.glucose	DEV.CotPaveCnt	-0.11505	0.332423	0.679522
MET.glucose_6p	DEV.CotPaveCnt	0.175583	0.137316	0.457714
MET.glutamate	DEV.CotPaveCnt	-0.00948614	0.936965	0.981042
MET.glutamine	DEV.CotPaveCnt	-0.0856778	0.48394	0.785072
MET.glycerate	DEV.CotPaveCnt	0.231704	0.0485588	0.26374
MET.glycerate_3p	DEV.CotPaveCnt	0.00841248	0.946551	0.983695
MET.glycerol	DEV.CotPaveCnt	-0.054326	0.652735	0.876232
MET.glycerol_1p	DEV.CotPaveCnt	0.0956744	0.420714	0.745796
MET.glycine	DEV.CotPaveCnt	-0.0201777	0.86545	0.955892
MET.homoserine	DEV.CotPaveCnt	0.0700049	0.556182	0.828188
MET.inositol	DEV.CotPaveCnt	-0.0343391	0.773029	0.925015
[truncated: 54,170 more rows]
