# Supplementary material
Source: Frontiers journal article supplement (https://www.frontiersin.org/articles/260772)
Supplement: Table_1.XLSX [file Table_1.XLSX]

## Sheet: Sheet1
Trait	QTL	Chromosome number	p-value	Average trait value	Transgressive (M82 or Sp)
Methylation index	IL_1.1.2	1	0.00747146	0.18
	IL_1.1.3	1	0.00565264	0.2
	IL_1.4	1	0.0177168	0.16
	IL_3.1	3	0.0479839	0.17
	IL_3.2	3	1.4145e-07	0.26
	IL_4.3	4	0.0255622	0.17
	IL_6.4	6	0.0452752	0.17
	IL_7.4	7	0.0157234	0.18
	IL_9.3.2	9	0.0217185	0.18
	IL_10.3	10	0.0305565	0.17
Percent anteiso-alkanes	IL_1.1.2	1	0.0458332	9.3	Sp
	IL_2.6.5	2	0.0281893	9.4	Sp
	IL_3.2	3	2.81556e-05	11.3	Sp
	IL_4.3	4	0.00158295	11.8	Sp
	IL_5.2	5	0.0401496	8.4	Sp
	IL_6.2	6	0.0284724	9	Sp
	IL_6.4	6	0.0475445	9.4	Sp
	IL_7.4	7	0.0195023	9.7	Sp
	IL_7.5.5	7	0.0424276	4	M82
	IL_9.3.2	9	0.00351453	10.9	Sp
	IL_10.3	10	0.0141197	9.5	Sp
Percent iso-alkanes	IL_1.1.2	1	0.0187343	8.9
	IL_1.1.3	1	0.00273766	10.5
	IL_1.3	1	0.000229616	11.8
	IL_1.4	1	0.0138886	8.7
	IL_1.4.18	1	0.00709058	10.1
	IL_3.2	3	1.92624e-05	10.2
	IL_5.5	5	0.0322337	9.1
	IL_8.1	8	0.0192933	4.9	M82
	IL_9.1.3	9	0.0251478	9
n-alkane CPI	IL_1.2	1	0.00493094	14.4	M82
	IL_1.3	1	0.00615362	14.45	M82
	IL_7.5.5	7	0.0456529	13.53	M82
	IL_8.1	8	0.0400479	13.6	M82
	IL_10.2	10	7.25472e-06	16.2	M82
	IL_10.2.2	10	0.0026813	14.566	M82
	IL_12.3	12	0.0489558	13.466	M82
anteiso-alkane CPI	IL_2.1.1	2	0.011	0.09
	IL_2.6	2	0.028	0.09
	IL_3.4	3	0.028	0.14
	IL_4.2	4	0.039	0.125
	IL_4.3.2	4	0.007	0.09
	IL_8.1.3	8	0.014	0.07
	IL_9.1.3	9	0.003	0.13
iso-alkane CPI	IL_1.1	1	0.0171905	15.466
	IL_1.1.2	1	0.00140417	17.6
	IL_1.3	1	0.034941	15.45
	IL_1.4.18	1	5.12421e-05	16.75
	IL_2.1	2	0.0259347	14.9
	IL_2.3	2	0.0142249	14.9
	IL_2.6	2	0.000438029	18.8
	IL_3.1	3	0.0128958	15.1
	IL_3.2	3	0.00160014	13.933
	IL_3.5	3	0.0406438	15.1
	IL_4.1.1	4	0.0397037	16.6
	IL_4.2	4	0.0141219	15
	IL_6.2	6	0.0245489	15.633
	IL_6.2.2	6	0.000293348	18.2
	IL_7.4	7	0.00603712	13.3
	IL_8.3	8	0.0498511	14.4
	IL_9.1.3	9	0.034849	13.6
	IL_10.2	10	0.000588256	16.33
	IL_10.2.2	10	0.00267199	17.366
n-alkane ACL	IL_2.5	2	9.39786e-05	31.63	Sp
	IL_4.1.1	4	0.0102982	31.1	M82
	IL_4.2	4	0.0130649	31.2	M82
	IL_4.3.2	4	0.0461253	31.2	M82
	IL_6.1	6	0.0460136	31.46
	IL_9.1.3	9	0.0460136	31.46
	IL_9.3.1	9	0.0130649	31.166	M82
anteiso-alkane ACL	IL_1.1	1	0.00567671	32	M82
	IL_1.1.3	1	0.0313723	32	M82
	IL_1.2	1	0.00567671	32	M82
	IL_3.4	3	0.0367932	32	M82
	IL_4.1.1	4	0.0293873	32	M82
	IL_4.2	4	0.0367932	32	M82
	IL_4.3	4	0.0367932	32	M82
	IL_4.3.2	4	0.0367932	32.2
	IL_5.1	5	0.0367932	32.1
	IL_5.5	5	0.0293873	32	M82
	IL_6.2.2	6	0.00567671	32.1
	IL_6.4	6	0.00567671	32.1
	IL_8.1.1	8	0.0367932	32.1
	IL_8.1.3	8	0.0293873	32	M82
	IL_9.3	9	0.00567671	32.1
	IL_9.1.3	9	0.0367932	32.1
	IL_10.3	10	0.0367932	32.1
iso-alkane ACL	IL_1.1	1	0.0220428	31.733	Sp
	IL_1.2	1	0.00245346	31.66	Sp
	IL_1.3	1	0.0137709	31.6	Sp
	IL_2.6.5	2	0.0472599	31.8
	IL_3.1	3	0.0220352	31.7	Sp
	IL_4.1.1	4	0.00306525	31.6	Sp
	IL_4.2	4	0.0024545	31.633	Sp
	IL_4.3	4	0.0220581	31.7	Sp
	IL_4.3.2	4	4.13151e-05	31.66	Sp
	IL_5.4	5	0.00778383	31.633	Sp
	IL_6.2.2	6	0.0220658	31.666	Sp
	IL_8.2.1	8	0.0220428	31.666	Sp
	IL_9.3.1	9	0.00778383	31.666	Sp
	IL_10.2.2	10	0.0220428	31.7	Sp
	IL_12.1	12	0.0129385	31.6	Sp
13ε i-C31 (‰)	IL_1.1	1	0.007052	-19.4
	IL_1.3	1	0.0426539	-19.2
	IL_1.4.18	1	0.0139746	-19.1
	IL_2.1	2	0.00176394	-20.3	Sp
	IL_3.2	3	0.0193318	-19
	IL_3.5	3	0.022652	-18.9
	IL_4.2	4	0.0384145	-18.7
	IL_4.3	4	0.0324959	-19
	IL_6.2	6	0.0384789	-18.7
	IL_8.3.1	8	0.0118227	-19.2
	IL_9.1.3	9	0.0076801	-19.4
	IL_9.3	9	0.0224689	-18.9
	IL_9.3.1	9	0.00841475	-19.3
	IL_10.2.2	10	0.0244832	-18.9
	IL_12.3.1	12	0.040997	-18.7
	IL_12.4.1	12	0.0331794	-18.8
13ε i-C33 (‰)	IL_1.1	1	0.0364681	-18.7
	IL_1.4.18	1	0.0202686	-19
	IL_2.1	2	0.00246297	-20.3	Sp
	IL_3.2	3	0.0328288	-18.7
	IL_3.5	3	0.0265447	-18.8
	IL_8.3.1	8	0.0453428	-18.6
	IL_9.1.3	9	0.00894678	-19.4
	IL_9.3	9	0.0326399	-18.8
	IL_9.3.1	9	0.0150818	-19.1
	IL_10.2.2	10	0.0145805	-19.1
	IL_12.4.1	12	0.041842	-18.6
13ε n-C31 (‰)	IL_1.1	1	0.00525112	-21.7	Sp
	IL_2.1	2	0.00679022	-21.9	Sp
	IL_2.4	2	0.0164016	-21.3
	IL_3.5	3	0.0341453	-20.8
	IL_6.1	6	0.030011	-20.9
	IL_8.3.1	8	0.00776931	-21.5
	IL_9.1.3	9	0.00523454	-21.7	Sp
	IL_9.3	9	0.0409895	-20.7
	IL_9.3.1	9	0.00719871	-21.5
	IL_12.4.1	12	0.0468452	-20.6
13ε n-C33 (‰)	IL_1.1	1	0.00747819	-21
	IL_1.4.18	1	0.0376962	-20.2
	IL_2.1	2	0.00406439	-21.6	Sp
	IL_2.4	2	0.0447751	-20.3
	IL_3.5	3	0.0331358	-20.3
	IL_6.1	6	0.0331358	-20.3
	IL_8.3.1	8	0.00870776	-20.9
	IL_9.1.3	9	0.00747819	-21
	IL_9.3	9	0.0271933	-20.4
	IL_9.3.1	9	0.00692452	-21
	IL_12.4.1	12	0.0427873	-20.1
δn – δiso (C31) (‰)	IL_2.4	2	0.000954688	-3.1	M82
	IL_2.5	2	0.00780953	-2.7	M82
	IL_4.3	4	0.00272632	-0.6	Sp
	IL_8.1.1	8	0.0338889	-2.8	M82
	IL_9.3.2	9	0.016762	-0.7	Sp
	IL_12.2	12	0.0345864	-2.1	M82
